# Supplementary material for: Solvent and catalyst-free bromofunctionalization of olefins using a mechanochemical approach
Source: Royal Society of Chemistry journal article supplement (doi:10.1039/d1ra01816g), 2021-01-01
Supplement: d1ra01816g1.pdf [file d1ra01816g1.pdf]

## Electronic Supplementary Information

# Solvent and Catalyst-Free Bromofunctionalization of Olefins Using a Mechanochemical Approach

Jonathan Wong, Ying-Yeung Yeung\*

Department of Chemistry and State Key Laboratory of Synthetic Chemistry, The Chinese  
University of Hong Kong, Shatin, NT, Hong Kong, China

E-mail: [yeyeung@cuhk.edu.hk](mailto:yeyeung@cuhk.edu.hk); Tel: +852-3943-6377

| Page     | Content                                      |
|----------|----------------------------------------------|
| S2       | General Information                          |
| S3-S27   | Experimental procedures and physical data    |
| S28-S121 | $^1\text{H}$ and $^{13}\text{C}$ NMR spectra |

## (A) General Information

Unless otherwise specified, commercially available reagents were used directly without further purification. All reactions requiring anhydrous conditions were conducted by standard procedures under nitrogen atmosphere. The solvents were dried over a solvent purification system from Innovative Technology. Melting points were determined on a Buchi B-540b melting point apparatus.  $^1\text{H}$  NMR and  $^{13}\text{C}\{^1\text{H}\}$  NMR spectra were recorded on a Bruker AMX500 (500 MHz) spectrometer or a Bruker AMX400 (400 MHz) spectrometer. Proton and carbon chemical shifts are reported in parts per million (ppm) values downfield from TMS ( $\delta$  0.00) and referenced to residual protons in NMR solvents ( $\text{CDCl}_3$  at  $\delta$  7.26,  $\text{CD}_2\text{Cl}_2$  at  $\delta$  5.36) or carbon signals in NMR solvent ( $\text{CDCl}_3$  at  $\delta$  77.16,  $\text{CD}_2\text{Cl}_2$  at  $\delta$  55.42).  $^1\text{H}$  NMR data were reported as follows: chemical shift, multiplicity, coupling constants (Hz), and integration. High resolution mass spectra were obtained on a Thermo Finnigan MAT95XL Magnetic Sector mass spectrometer (ionization mode: EI) or a Thermo Q Exactive Hybrid Quadrupole-Orbitrap mass spectrometer (ESI). Analytical thin layer chromatography (TLC) was performed with Merck precoated TLC plates, silica gel 60F-254, layer thickness 0.25 mm. Flash chromatography separations were performed on Merck 60 (0.040–0.063 mm) mesh silica gel.

## (B) Mechanochemical Bromolactonization Reactions

**General Procedure.** Alkenoic acid **1** (0.2 mmol) and NBS (39.2 mg, 0.22 mmol) were added into a 10 mL zirconium oxide chamber. The milling chamber was then securely fastened into a Retsch mixer mill (MM 400) and set to oscillate at 30 Hz for 1 hour. On completion of reaction, the mill chamber was extracted with hexane or cyclohexane and the solution was filtered through a thin plug of celite. The filtrate was concentrated under reduced pressure to give the desired product **2** with high purity. No column chromatography was necessary.

### 5-(bromomethyl)-5-phenyldihydrofuran-2(3H)-one (**2a**)

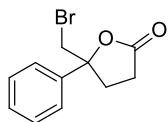

Yield: 97% (49.5 mg, colorless oil)

$^1\text{H}$  NMR (500 MHz,  $\text{CDCl}_3$ ):  $\delta$  7.41 (d,  $J = 4.3$  Hz, 4H), 7.33-7.39 (m, 1H), 3.74 (d,  $J = 11.4$  Hz, 1H), 3.69 (d,  $J = 11.4$ , 1H), 2.77-2.86 (m, 2H), 2.49-2.61 (m, 2H).

$^{13}\text{C}\{^1\text{H}\}$  NMR (125 MHz,  $\text{CDCl}_3$ ):  $\delta$  175.7, 140.8, 129.0, 128.8, 125.0, 86.6, 41.2, 32.5, 29.2.

HRMS (ESI-Q-orbitrap)  $m/z$ :  $[\text{M} + \text{Na}]^+$  calcd for  $\text{C}_{11}\text{H}_{11}\text{BrO}_2$  276.98346, found 276.98365.

The data are in full accordance with the literature (Chen, T.; Foo, T. J. Y.; Yeung, Y.-Y. *ACS Catal.* **2015**, *5* (8), 4751–4755).

### 5-(bromomethyl)-5-(p-tolyl)dihydrofuran-2(3H)-one (**2b**)

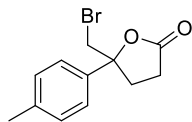

Yield: 98% (52.7 mg, colorless oil)

$^1\text{H}$  NMR (500 MHz,  $\text{CDCl}_3$ ):  $\delta$  7.29 (d,  $J = 7.5$  Hz, 2H), 7.21 (d,  $J = 7.5$  Hz, 2H), 3.73 (d,  $J = 11.1$  Hz, 1H), 3.67 (d,  $J = 11.1$ , 1H), 2.74-2.84 (m, 2H), 2.48-2.58 (m, 2H), 2.36 (s, 3H).

$^{13}\text{C}\{^1\text{H}\}$  NMR (125 MHz,  $\text{CDCl}_3$ ):  $\delta$  175.8, 138.7, 137.8, 129.6, 125.0, 86.6, 41.2, 32.4, 29.2, 21.2.

HRMS (ESI-Q-orbitrap)  $m/z$ :  $[\text{M} + \text{Na}]^+$  calcd for  $\text{C}_{12}\text{H}_{13}\text{BrO}_2$  290.99911, found 290.99917.

The data are in full accordance with the literature (Chen, T.; Foo, T. J. Y.; Yeung, Y.-Y. *ACS Catal.* **2015**, 5 (8), 4751–4755).

5-(bromomethyl)-5-(4-methoxyphenyl)dihydrofuran-2(3H)-one (**2c**)

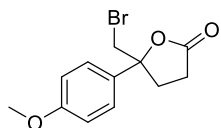

Yield: 87% (49.6 mg, colorless oil)

$^1\text{H}$  NMR (500 MHz,  $\text{CDCl}_3$ ):  $\delta$  7.33 (d,  $J = 8.9$  Hz, 2H), 6.91 (d,  $J = 8.9$  Hz, 2H), 3.81 (s, 3H), 3.71 (d,  $J = 11.3$  Hz, 1H), 3.65 (d,  $J = 11.3$  Hz, 1H), 2.75-2.83 (m, 2H), 2.50-2.58 (m, 2H).

$^{13}\text{C}\{^1\text{H}\}$  NMR (125 MHz,  $\text{CDCl}_3$ ):  $\delta$  175.8, 159.8, 132.6, 126.4, 114.3, 86.5, 55.5, 41.3, 32.3, 29.3.

HRMS (ESI-Q-orbitrap)  $m/z$ :  $[\text{M} + \text{Na}]^+$  calcd for  $\text{C}_{12}\text{H}_{13}\text{BrO}_3$  306.99403, found 306.99378.

The data are in full accordance with the literature (Zhou, L.; Tan, C. K.; Jiang, X.; Chen, F.; Yeung, Y.-Y. *J. Am. Chem. Soc.* **2010**, 132 (44), 15474–15476.).

5-(bromomethyl)-5-(4-chlorophenyl)dihydrofuran-2(3H)-one (**2d**)

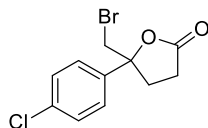

Yield: 98% (56.7 mg, colorless oil)

$^1\text{H}$  NMR (500 MHz,  $\text{CDCl}_3$ ):  $\delta$  7.39 (d,  $J = 8.6$  Hz, 2H), 7.35 (d,  $J = 8.6$  Hz, 2H), 3.70 (d,  $J = 11.3$  Hz, 1H), 3.65 (d,  $J = 11.3$  Hz, 1H), 2.75-2.86 (m, 2H), 2.48-2.59 (m, 2H).

$^{13}\text{C}\{^1\text{H}\}$  NMR (125 MHz,  $\text{CDCl}_3$ ):  $\delta$  175.3, 139.4, 134.9, 129.2, 126.6, 86.1, 40.7, 32.5, 29.1.

HRMS (ESI-Q-orbitrap)  $m/z$ :  $[\text{M} + \text{Na}]^+$  calcd for  $\text{C}_{11}\text{H}_{10}\text{BrClO}_2$  312.94236, found 312.94231.

The data are in full accordance with the literature (Chen, T.; Foo, T. J. Y.; Yeung, Y.-Y. *ACS Catal.* **2015**, *5* (8), 4751–4755).

5-(bromomethyl)-5-(4-fluorophenyl)dihydrofuran-2(3H)-one (**2e**)

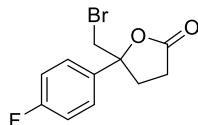

Yield: 90% (49.2 mg, colorless oil)

$^1\text{H}$  NMR (500 MHz,  $\text{CDCl}_3$ ):  $\delta$  7.40 (d,  $J = 8.7$  Hz, 1H), 7.39 (d,  $J = 8.7$  Hz, 1H), 7.10 (t,  $J = 8.7$  Hz, 2H), 3.70 (d,  $J = 11.3$  Hz, 1H), 3.65 (d,  $J = 11.3$  Hz, 1H), 2.76–2.87 (m, 2H), 2.49–2.60 (m, 2H).

$^{13}\text{C}\{^1\text{H}\}$  NMR (125 MHz,  $\text{CDCl}_3$ ):  $\delta$  175.4, 163.8, 161.8, 136.7, 136.6, 127.1, 127.0, 116.0, 115.9, 86.2, 41.0, 32.5, 29.2.

HRMS (ESI-Q-orbitrap)  $m/z$ :  $[\text{M} + \text{Na}]^+$  calcd for  $\text{C}_{11}\text{H}_{10}\text{BrFO}_2$  294.97404, found 294.97435.

The data are in full accordance with the literature (Zhou, L.; Tan, C. K.; Jiang, X.; Chen, F.; Yeung, Y.-Y. *J. Am. Chem. Soc.* **2010**, *132* (44), 15474–15476.).

5-(bromomethyl)-5-(4-(trifluoromethyl)phenyl)dihydrofuran-2(3H)-one (**2f**)

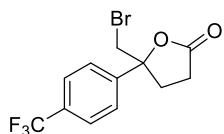

Yield: 98% (63.3 mg, colorless oil)

$^1\text{H}$  NMR (500 MHz,  $\text{CDCl}_3$ ):  $\delta$  7.67 (d,  $J = 8.2$  Hz, 2H), 7.55 (d,  $J = 8.2$  Hz, 2H), 3.72 (d,  $J = 11.5$  Hz, 1H), 3.70 (d,  $J = 11.5$  Hz, 1H), 2.78–2.88 (m, 2H), 2.50–2.60 (m, 2H).

$^{13}\text{C}\{^1\text{H}\}$  NMR (125 MHz,  $\text{CDCl}_3$ ):  $\delta$  175.1, 144.8, 131.0 (q,  $J = 33$  Hz), 126.0 (q,  $J = 4$  Hz), 125.6, 123.9 (q,  $J = 272$  Hz), 86.0, 40.4, 32.6, 29.0.

HRMS (ESI-Q-orbitrap)  $m/z$ :  $[\text{M} + \text{Na}]^+$  calcd for  $\text{C}_{12}\text{H}_{10}\text{BrF}_3\text{O}_2$  344.97085, found 344.97095.

The data are in full accordance with the literature (Zhou, L.; Tan, C. K.; Jiang, X.; Chen, F.; Yeung, Y.-Y. *J. Am. Chem. Soc.* **2010**, *132* (44), 15474–15476.).

5-(4-acetylphenyl)-5-(bromomethyl)dihydrofuran-2(3H)-one (**2g**)

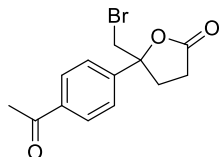

Yield: 81% (48.1 mg, white solid).

IR (KBr): 3020, 1785, 1737, 1685, 1270, 1216, 1162, 760, 668  $\text{cm}^{-1}$ .

$^1\text{H}$  NMR (500 MHz,  $\text{CDCl}_3$ ):  $\delta$  8.00 (d,  $J = 8.6$  Hz, 2H), 7.52 (d,  $J = 8.6$  Hz, 2H), 3.73 (d,  $J = 11.4$  Hz, 1H), 3.70 (d,  $J = 11.4$  Hz, 1H), 2.76-2.89 (m, 2H), 2.62 (s, 3H), 2.50-2.60 (m, 2H).

$^{13}\text{C}\{^1\text{H}\}$  NMR (125 MHz,  $\text{CDCl}_3$ ):  $\delta$  197.4, 175.2, 145.8, 137.4, 129.0, 125.4, 86.3, 40.5, 32.6, 29.1, 26.8.

HRMS (ESI-Q-orbitrap)  $m/z$ :  $[\text{M} + \text{Na}]^+$  calcd for  $\text{C}_{13}\text{H}_{13}\text{BrO}_3$  318.99403, found 318.99413.

5-bromo-6-phenyltetrahydro-2H-pyran-2-one **2h**

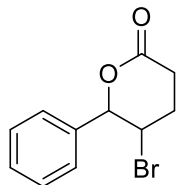

Yield: 78%, d.r. > 99:1 (39.7 mg, white solid)

$^1\text{H}$  NMR (500 MHz,  $\text{CDCl}_3$ ):  $\delta$  7.36-7.43 (m, 3H), 7.32 (d,  $J = 6.9$  Hz, 2H), 5.56 (d,  $J = 6.4$  Hz, 1H), 4.39 (dd,  $J = 11.0, 6.4$  Hz, 1H), 2.95 (dt,  $J = 18.2, 8.2$  Hz, 1H), 2.72 (dt,  $J = 18.2, 6.2$  Hz, 1H), 2.38-2.46 (m, 1H), 2.23-2.31 (m, 1H).

$^{13}\text{C}\{^1\text{H}\}$  NMR (125 MHz,  $\text{CDCl}_3$ ):  $\delta$  169.2, 137.4, 129.2, 128.9, 126.5, 85.7, 47.3, 28.5, 27.7.

HRMS (ESI-Q-orbitrap)  $m/z$ :  $[\text{M} + \text{Na}]^+$  calcd for  $\text{C}_{11}\text{H}_{11}\text{BrO}_2$  276.98346, found 276.98327.

The data are in full accordance with the literature (Zhou, L.; Tan, C. K.; Jiang, X.; Chen, F.; Yeung, Y.-Y. *J. Am. Chem. Soc.* **2010**, *132* (44), 15474–15476.).

### (C) Mechanochemical Bromocycloetherification Reactions

**General Procedure.** Olefinic mono-alcohol **5** (0.2 mmol) and NBS (39.2 mg, 0.22 mmol) were added into a 10 mL zirconium oxide chamber. The milling chamber was then securely fastened into a Retsch mixer mill (MM 400) and set to oscillate at 30 Hz, for 1 hour. On completion of reaction, the ball mill chamber was extracted with hexane and the solution was filtered through a thin plug of celite. The filtrate was concentrated under reduced pressure to give the desired product **6** in high purity. No column chromatography was necessary.

#### 2-(bromomethyl)-2-phenyltetrahydrofuran (**6a**)

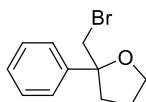

Yield: 98% (47.2 mg, colorless oil).

$^1\text{H}$  NMR (500 MHz,  $\text{CDCl}_3$ ):  $\delta$  7.40-7.44 (m, 2H), 7.38-7.38 (m, 2H), 7.26-7.30 (m, 1H), 4.06-4.12 (m, 1H), 3.92-3.97 (m, 1H), 3.66 (s, 2H), 2.40-2.46 (m, 1H), 2.23-2.30 (m, 1H), 2.02-2.10 (m, 1H), 1.80-1.89 (m, 1H).

$^{13}\text{C}\{^1\text{H}\}$  NMR (125 MHz,  $\text{CDCl}_3$ ):  $\delta$  144.1, 128.4, 127.5, 125.7, 85.4, 68.8, 42.3, 36.6, 26.3.

The data are in full accordance with the literature (Greb, M.; Hartung, J.; Köhler, F.; Špehar, K.; Kluge, R.; Csuk, R. *European J. Org. Chem.* **2004**, 2004 (18), 3799–3812.).

#### 2-(bromomethyl)-2-(p-tolyl)tetrahydrofuran (**6b**)

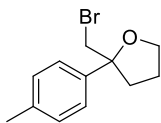

Yield: 99% (50.5 mg, colorless oil).

IR (KBr): 3017, 1216, 750  $\text{cm}^{-1}$ .

$^1\text{H}$  NMR (500 MHz,  $\text{CDCl}_3$ ):  $\delta$  7.31 (d,  $J = 7.5$  Hz, 2H), 7.17 (d,  $J = 7.5$  Hz, 2H), 4.08 (dd,  $J = 14.5, 7.3$  Hz, 1H), 3.93 (dd,  $J = 14.5, 7.3$  Hz, 1H), 3.64 (s, 2H), 2.37-2.44 (m, 1H), 2.35 (s, 3H), 2.21-2.28 (m, 1H), 2.00-2.09 (m, 1H), 1.80-1.89 (m, 1H).

$^{13}\text{C}\{^1\text{H}\}$  NMR (125 MHz,  $\text{CDCl}_3$ ):  $\delta$  141.1, 137.2, 129.1, 125.6, 85.3, 68.7, 42.4, 36.5, 26.3, 21.2.

HRMS (ESI-Q-orbitrap)  $m/z$ :  $[\text{M}-\text{H}_2\text{O}+\text{H}]^+$  calcd for  $\text{C}_{12}\text{H}_{15}\text{BrO}$  237.02734, found 237.02724.

#### 2-(bromomethyl)-2-(4-methoxyphenyl)tetrahydrofuran (**6c**)

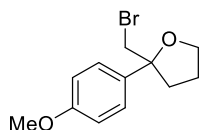

Yield: 76% (41.2 mg, colorless oil).

IR (KBr): 3019, 1510, 1249, 1216, 763, 669  $\text{cm}^{-1}$ .

$^1\text{H}$  NMR (500 MHz,  $\text{CDCl}_3$ ):  $\delta$  7.33 (d,  $J = 8.7$  Hz, 2H), 6.88 (d,  $J = 8.7$  Hz, 2H), 4.07 (dd,  $J = 14.7, 7.4$  Hz, 1H), 3.92 (dd,  $J = 14.7, 7.4$  Hz, 1H), 3.81 (s, 3H), 3.62 (s, 2H), 2.36-2.43 (m, 1H), 2.20-2.67 (m, 1H), 2.00-2.09 (m, 1H), 1.809-1.89 (m, 1H).

$^{13}\text{C}\{^1\text{H}\}$  NMR (125 MHz,  $\text{CDCl}_3$ ):  $\delta$  159.0, 136.0, 126.9, 113.7, 85.1, 68.7, 55.4, 42.5, 36.4, 26.3.

HRMS (ESI-Q-orbitrap)  $m/z$ :  $[\text{M}-\text{H}_2\text{O}+\text{H}]^+$  calcd for  $\text{C}_{12}\text{H}_{15}\text{BrO}_2$  253.02225, found 253.02216.

#### 2-(bromomethyl)-2-(4-chlorophenyl)tetrahydrofuran (**6d**)

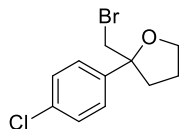

Yield: 90% (49.6 mg, colorless oil).

IR (KBr): 3018, 1490, 1216, 1052, 752  $\text{cm}^{-1}$ .

$^1\text{H}$  NMR (500 MHz,  $\text{CDCl}_3$ ):  $\delta$  7.35 (d,  $J = 8.0$  Hz, 2H), 7.32 (d,  $J = 8.0$  Hz, 2H), 4.08 (dd,  $J = 14.5, 7.2$  Hz, 1H), 3.92 (dd,  $J = 14.5, 7.2$  Hz, 1H), 3.60 (s, 2H), 2.36-2.43 (m, 1H), 2.16-2.25 (m, 1H), 2.01-2.10 (m, 1H), 1.79-1.89 (m, 1H).



$^{13}\text{C}\{^1\text{H}\}$  NMR (125 MHz,  $\text{CDCl}_3$ ):  $\delta$  142.6, 133.4, 128.5, 127.2, 85.1, 68.9, 41.9, 36.7, 26.2.

HRMS (ESI-Q-orbitrap)  $m/z$ :  $[\text{M}+\text{H}]^+$  calcd for  $\text{C}_{11}\text{H}_{12}\text{BrClO}$  276.98107, found 276.98107.

2-(bromomethyl)-2-(4-fluorophenyl)tetrahydrofuran (**6e**)

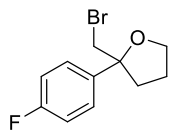

Yield: 93% (48.2 mg, colorless oil).

IR (KBr): 3017, 2981, 1604, 1508, 1210, 1052, 838, 756  $\text{cm}^{-1}$ .

$^1\text{H}$  NMR (500 MHz,  $\text{CDCl}_3$ ):  $\delta$  7.38 (m, 2H), 7.03 (t,  $J = 8.3$  Hz, 2H), 4.08 (dd,  $J = 14.5, 7.4$  Hz, 1H), 3.92 (dd,  $J = 14.5, 7.4$  Hz, 1H), 3.61 (s, 2H), 2.37-2.44 (m, 1H), 2.19-2.26 (m, 1H), 2.01-2.10 (m, 1H), 1.80-1.89 (m, 1H).

$^{13}\text{C}\{^1\text{H}\}$  NMR (125 MHz,  $\text{CDCl}_3$ ):  $\delta$  163.2, 161.2, 139.8, 139.7, 127.5, 127.4, 115.3, 115.1, 85.1, 68.8, 42.1, 36.7, 26.2.

HRMS (ESI-Q-orbitrap)  $m/z$ :  $[\text{M}+\text{H}]^+$  calcd for  $\text{C}_{11}\text{H}_{12}\text{BrFO}$  259.01283, found 259.01287.

2-(bromomethyl)-2-(4-(trifluoromethyl)phenyl)tetrahydrofuran (**6f**)

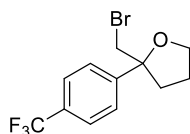

Yield: 98% (60.6 mg, colorless oil).

$^1\text{H}$  NMR (500 MHz,  $\text{CDCl}_3$ ):  $\delta$  7.61 (d,  $J = 8.3$  Hz, 2H), 7.54 (d,  $J = 8.3$  Hz, 2H), 4.08-4.13 (m, 1H), 3.92-3.97 (m, 1H), 3.63 (d,  $J = 0.9$  Hz, 2H), 2.41-2.47 (m, 1H), 2.21-2.28 (m, 1H), 2.04-2.12 (m, 1H), 1.80-1.90 (m, 1H).

$^{13}\text{C}\{^1\text{H}\}$  NMR (125 MHz,  $\text{CDCl}_3$ ):  $\delta$  148.2, 129.8 (q,  $J = 32$  Hz), 126.2, 125.4 (q,  $J = 4$  Hz), 124.4 (q,  $J = 271$  Hz), 85.3, 69.0, 41.6, 36.9, 26.2.

The data are in full accordance with the literature (Greb, M.; Hartung, J.; Köhler, F.; Špehar, K.; Kluge, R.; Csuk, R. *European J. Org. Chem.* **2004**, 2004 (18), 3799–3812.).

2-(3,5-bis(trifluoromethyl)phenyl)-2-(bromomethyl)tetrahydrofuran (**6g**)

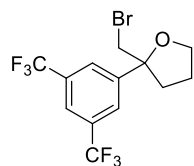

Yield: 98% (73.9 mg, colorless oil).

IR (KBr): 3019, 1377, 1280, 1216, 1180, 1139, 1055, 900, 844, 757, 669  $\text{cm}^{-1}$ .

$^1\text{H}$  NMR (500 MHz,  $\text{CDCl}_3$ ):  $\delta$  7.89 (s, 2H), 7.81 (s, 1H), 4.11-4.16 (m, 1H), 3.95-4.00 (m, 1H), 3.63 (d,  $J = 10.8$  Hz, 1H), 3.59 (d,  $J = 10.8$ , 1H), 2.47-2.54 (m, 1H), 2.24-2.30 (m, 1H), 2.08-2.17 (m, 1H), 1.84-1.93 (m, 1H).

$^{13}\text{C}\{^1\text{H}\}$  NMR (125 MHz,  $\text{CDCl}_3$ ):  $\delta$  147.0, 131.7 (q,  $J = 33$  Hz), 126.2, 123.4 (q,  $J = 273$  Hz), 121.6-121.8 (m), 85.0, 69.2, 41.0, 37.1, 26.3.

## (D) Mechanochemical Intermolecular Bromoesterification Reactions

**General Procedure.** Carboxylic acid **7** (0.2 mmol), alkene **8** (0.22 mmol) and DBDMH (62.9 mg, 0.22 mmol) were added into a 10 mL zirconium oxide chamber. The milling chamber was then securely fastened into a Retsch mixer mill (MM 400) and set to oscillate at 30 Hz, for 1 hour. On completion of reaction, the ball mill chamber was extracted with hexane and the solution was filtered through a thin plug of celite. The filtrate was concentrated under reduced pressure to give the desired product **9**. Purification using flash chromatography through silica gel (hexane/ethyl acetate 40:1) was used to obtain the final product.

### 2-bromo-1-phenylethyl benzoate (**9aa**)

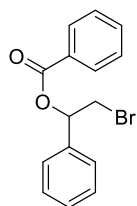

Yield: 92% (56.2 mg, colorless oil,  $R_f = 0.47$ , hexane/ethyl acetate = 10:1).

$^1\text{H}$  NMR (500 MHz,  $\text{CDCl}_3$ ):  $\delta$  8.12-8.16 (m, 2H), 7.60 (tt,  $J = 7.4, 1.2$  Hz, 1H), 7.44-7.51 (m, 4H), 7.34-7.43 (m, 3H), 6.24 (dd,  $J = 8.0, 4.5$  Hz, 1H), 3.83 (dd,  $J = 10.9, 8.0$  Hz, 1H), 3.75 (dd,  $J = 10.9, 4.5$  Hz, 1H).

$^{13}\text{C}\{^1\text{H}\}$  NMR (125 MHz,  $\text{CDCl}_3$ ):  $\delta$  165.5, 137.9, 133.4, 129.9, 129.8, 128.6, 126.6, 75.4, 34.6.

HRMS (ESI-Q-orbitrap)  $m/z$ :  $[\text{M} + \text{Na}]^+$  calcd for  $\text{C}_{15}\text{H}_{13}\text{BrO}_2$  326.99911, found 326.99884.

The data are in full accordance with the literature (Ng, W.-H.; Hu, R.-B.; Lam, Y.-P.; Yeung, Y.-Y. *Org. Lett.* **2020**, 22 (14), 5572–5576.).

### 2-bromo-1-(p-tolyl)ethyl benzoate (**9ab**)

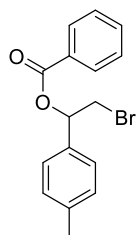

Yield: 93% (59.3 mg, colorless oil,  $R_f = 0.30$ , hexane/dichloromethane = 2:1).

$^1\text{H}$  NMR (500 MHz,  $\text{CDCl}_3$ ):  $\delta$  8.11 (d,  $J = 7.5$  Hz, 2H), 7.58 (t,  $J = 7.6$  Hz, 1H), 7.46 (t,  $J = 7.6$  Hz, 2H), 7.34 (d,  $J = 7.8$  Hz, 2H), 7.20 (d,  $J = 7.8$  Hz, 2H), 6.18 (dd,  $J = 8.0, 4.5$  Hz, 1H), 3.81 (dd,  $J = 10.8, 8.3$  Hz, 1H), 3.71 (dd,  $J = 10.8, 4.5$  Hz, 1H), 2.35 (s, 1H).

$^{13}\text{C}\{^1\text{H}\}$  NMR (125 MHz,  $\text{CDCl}_3$ ):  $\delta$  165.6, 138.9, 134.9, 133.4, 130.0, 129.6, 128.6, 126.6, 75.5, 34.6, 21.4.

HRMS (ESI-Q-orbitrap)  $m/z$ :  $[\text{M} + \text{Na}]^+$  calcd for  $\text{C}_{16}\text{H}_{15}\text{BrO}_2$  341.01476, found 341.01511.

The data are in full accordance with the literature (Ng, W.-H.; Hu, R.-B.; Lam, Y.-P.; Yeung, Y.-Y. *Org. Lett.* **2020**, 22 (14), 5572–5576.).

2-bromo-1-mesitylethyl benzoate (**9ac**)

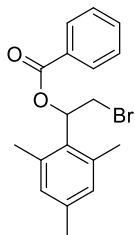

Yield: 99% (68.5 mg, colorless oil,  $R_f = 0.40$ , hexane/ethyl acetate = 20:1).

$^1\text{H}$  NMR (500 MHz,  $\text{CDCl}_3$ ):  $\delta$  8.11–8.14 (m, 2H), 7.57–7.61 (m, 1H), 7.46–7.50 (m, 2H), 6.87 (s, 2H), 6.62 (dd,  $J = 10.1, 4.6$  Hz, 1H), 4.07 (dd,  $J = 11.0, 10.1$  Hz, 1H), 3.69 (dd,  $J = 11.0, 4.6$  Hz, 1H), 2.55 (s, 6H), 2.27 (s, 3H).

$^{13}\text{C}\{^1\text{H}\}$  NMR (125 MHz,  $\text{CDCl}_3$ ):  $\delta$  165.6, 138.4, 136.8, 133.2, 130.6, 130.4, 129.9, 129.8, 128.6, 73.5, 32.0, 21.0, 20.8.

HRMS (ESI-Q-orbitrap)  $m/z$ :  $[\text{M} + \text{Na}]^+$  calcd for  $\text{C}_{18}\text{H}_{19}\text{BrO}_2$  369.04606, found 369.04625.

The data are in full accordance with the literature (Ng, W.-H.; Hu, R.-B.; Lam, Y.-P.; Yeung, Y.-Y. *Org. Lett.* **2020**, 22 (14), 5572–5576.).

2-bromo-1-(4-(tert-butyl)phenyl)ethyl benzoate (**9ad**)

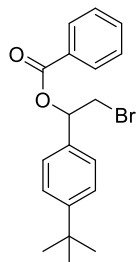

Yield: 90% (65.0 mg, colorless oil,  $R_f = 0.37$ , hexane/dichloromethane = 2:1).

$^1\text{H}$  NMR (500 MHz,  $\text{CDCl}_3$ ):  $\delta$  8.13 (d,  $J = 7.6$  Hz, 2H), 7.58 (t,  $J = 7.4$  Hz, 1H), 7.47 (t,  $J = 7.6$  Hz, 2H), 7.36-7.43 (m, 4H), 6.21 (dd,  $J = 8.3, 4.3$  Hz, 1H), 3.82 (dd,  $J = 10.9, 8.6$  Hz, 1H), 3.73 (dd,  $J = 10.9, 4.4$  Hz, 1H), 1.31 (s, 9H).

$^{13}\text{C}\{^1\text{H}\}$  NMR (125 MHz,  $\text{CDCl}_3$ ):  $\delta$  165.6, 152.0, 134.8, 133.4, 130.0, 128.6, 126.4, 125.8, 75.4, 34.8, 34.6, 31.4.

HRMS (ESI-Q-orbitrap)  $m/z$ :  $[\text{M} + \text{Na}]^+$  calcd for  $\text{C}_{19}\text{H}_{21}\text{BrO}_2$  383.06171, found 383.06263.

The data are in full accordance with the literature (Ng, W.-H.; Hu, R.-B.; Lam, Y.-P.; Yeung, Y.-Y. *Org. Lett.* **2020**, 22 (14), 5572–5576.).

2-bromo-1-(4-bromophenyl)ethyl benzoate (**9ae**)

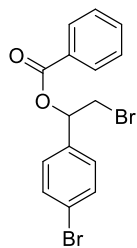

Yield: 89% (68.3 mg, colorless oil,  $R_f = 0.30$ , hexane/dichloromethane = 2:1).

$^1\text{H}$  NMR (500 MHz,  $\text{CDCl}_3$ ):  $\delta$  8.09-8.13 (m, 2H), 7.58-7.62 (m, 1H), 7.51-7.54 (m, 2H), 7.46-7.50 (m, 2H), 7.31-7.35 (m, 2H), 6.16 (dd,  $J = 7.5, 4.9$  Hz, 1H), 3.78 (dd,  $J = 10.9, 7.5$  Hz, 1H), 3.71 (dd,  $J = 10.9, 4.9$  Hz, 1H).

$^{13}\text{C}\{^1\text{H}\}$  NMR (125 MHz,  $\text{CDCl}_3$ ):  $\delta$  165.4, 136.9, 133.6, 132.1, 129.9, 129.6, 128.7, 128.4, 123.0, 74.7, 34.1.

HRMS (ESI-Q-orbitrap)  $m/z$ :  $[M + Na]^+$  calcd for  $C_{15}H_{12}Br_2O_2$  406.90765, found 406.90751.

The data are in full accordance with the literature (Ng, W.-H.; Hu, R.-B.; Lam, Y.-P.; Yeung, Y.-Y. *Org. Lett.* **2020**, 22 (14), 5572–5576.).

2-bromo-1-(4-chlorophenyl)ethyl benzoate (**9af**)

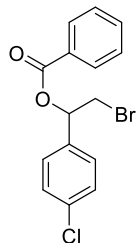

Yield: 88% (59.8 mg, colorless oil,  $R_f$  = 0.27, hexane/dichloromethane = 2:1).

$^1H$  NMR (500 MHz,  $CDCl_3$ ):  $\delta$  8.10–8.14 (m, 2H), 7.58–7.62 (m, 1H), 7.46–7.50 (m, 2H), 7.35–7.41 (m, 4H), 6.19 (dd,  $J$  = 7.5, 4.9 Hz, 1H), 3.79 (dd,  $J$  = 10.9, 7.5 Hz, 1H), 3.72 (dd,  $J$  = 10.9, 4.9 Hz, 1H).

$^{13}C\{^1H\}$  NMR (125 MHz,  $CDCl_3$ ):  $\delta$  165.4, 136.3, 134.8, 133.6, 129.9, 129.6, 129.1, 128.6, 128.1, 74.7, 34.2.

HRMS (ESI-Q-orbitrap)  $m/z$ :  $[M + Na]^+$  calcd for  $C_{15}H_{12}BrClO_2$  362.95798, found 362.95726.

The data are in full accordance with the literature (Ng, W.-H.; Hu, R.-B.; Lam, Y.-P.; Yeung, Y.-Y. *Org. Lett.* **2020**, 22 (14), 5572–5576.).

2-bromo-1-(4-fluorophenyl)ethyl benzoate (**9ag**)

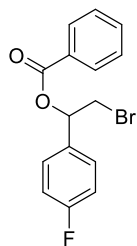

Yield: 93% (60.1 mg, colorless oil,  $R_f$  = 0.24, hexane/dichloromethane = 2:1).

IR (KBr): 3020, 1722, 1511, 1268, 1216, 1109, 757, 669  $cm^{-1}$ .

$^1\text{H}$  NMR (500 MHz,  $\text{CDCl}_3$ ):  $\delta$  8.09-8.12 (m, 2H), 7.58-7.62 (m, 1H), 7.41-7.50 (m, 4H), 7.05-7.11 (m, 2H), 6.19 (dd,  $J = 7.6, 4.8$  Hz, 1H), 3.79 (dd,  $J = 10.9, 7.6$  Hz, 1H), 3.71 (dd,  $J = 10.9, 4.8$  Hz, 1H).

$^{13}\text{C}\{^1\text{H}\}$  NMR (125 MHz,  $\text{CDCl}_3$ ):  $\delta$  165.5, 164.0, 162.0, 133.8, 133.7, 133.6, 130.0, 129.7, 128.7, 128.6, 128.5, 116.0, 115.8, 74.8, 34.4.

HRMS (ESI-Q-orbitrap)  $m/z$ :  $[\text{M} + \text{Na}]^+$  calcd for  $\text{C}_{15}\text{H}_{12}\text{BrFO}_2$  344.98969, found 344.98986.

#### 2-bromocyclohexyl benzoate (**9ah**)

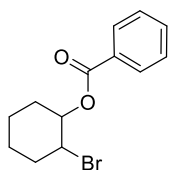

Yield: 86% (48.6 mg, colorless oil,  $R_f = 0.17$ , pure hexane).

$^1\text{H}$  NMR (500 MHz,  $\text{CDCl}_3$ ):  $\delta$  8.07 (d,  $J = 7.5$  Hz, 2H), 7.57 (t,  $J = 7.4$  Hz, 1H), 7.45 (t,  $J = 7.7$  Hz, 2H), 5.10-5.16 (m, 1H), 4.13-4.19 (m, 1H), 2.38-2.45 (m, 1H), 2.24-2.33 (m, 1H), 1.90-2.00 (m, 1H), 1.74-1.87 (m, 2H), 1.47-1.57 (m, 2H), 1.35-1.45 (m, 1H).

$^{13}\text{C}\{^1\text{H}\}$  NMR (125 MHz,  $\text{CDCl}_3$ ):  $\delta$  165.7, 133.2, 130.3, 129.9, 128.5, 76.5, 52.8, 35.7, 31.2, 25.6, 23.4.

HRMS (ESI-Q-orbitrap)  $m/z$ :  $[\text{M} + \text{Na}]^+$  calcd for  $\text{C}_{13}\text{H}_{15}\text{BrO}_2$  305.01476, found 305.01457.

The data are in full accordance with the literature (Ng, W.-H.; Hu, R.-B.; Lam, Y.-P.; Yeung, Y.-Y. *Org. Lett.* **2020**, 22 (14), 5572–5576.).

#### 2-bromo-1-phenylethyl 2,4-dimethylbenzoate (**9ba**)

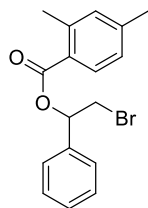

Yield: 82% (54.6 mg, colorless oil,  $R_f = 0.57$ , hexane/dichloromethane = 1:1).

IR (KBr): 3019, 1717, 1615, 1256, 1216, 756  $\text{cm}^{-1}$ .

$^1\text{H}$  NMR (500 MHz,  $\text{CDCl}_3$ ):  $\delta$  7.99 (d,  $J = 7.8$  Hz, 1H), 7.33-7.47 (m, 5H), 7.10 (d,  $J = 8.8$  Hz, 2H), 6.20 (dd,  $J = 8.0, 4.6$  Hz, 1H), 3.80 (dd,  $J = 10.9, 8.0$  Hz, 1H), 3.73 (dd,  $J = 10.9, 4.6$  Hz, 1H), 2.60 (s, 3H), 2.38 (s, 3H).

$^{13}\text{C}\{^1\text{H}\}$  NMR (125 MHz,  $\text{CDCl}_3$ ):  $\delta$  166.2, 143.1, 141.0, 138.1, 132.7, 131.2, 128.9, 126.7, 126.2, 75.2, 34.8, 22.1, 21.6.

HRMS (ESI-Q-orbitrap)  $m/z$ :  $[\text{M} + \text{Na}]^+$  calcd for  $\text{C}_{17}\text{H}_{17}\text{BrO}_2$  355.03041, found 355.03042.

#### 2-bromo-1-phenylethyl 2,4,6-trimethylbenzoate (**9ca**)

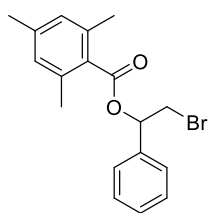

Yield: 90% (62.5 mg, colorless oil,  $R_f = 0.43$ , hexane/ethyl acetate = 20:1).

IR (KBr): 3020, 1726, 1612, 1262, 1216, 1167, 1079, 756, 669  $\text{cm}^{-1}$ .

$^1\text{H}$  NMR (500 MHz,  $\text{CDCl}_3$ ):  $\delta$  7.42-7.46 (m, 2H), 7.35-7.42 (m, 3H), 6.86 (s, 2H), 6.25 (dd,  $J = 8.7, 4.2$  Hz, 1H), 3.78 (dd,  $J = 11.0, 8.7$  Hz, 1H), 3.67 (dd,  $J = 11.0, 4.2$  Hz, 1H), 2.29 (s, 3H), 2.24 (s, 6H).

$^{13}\text{C}\{^1\text{H}\}$  NMR (125 MHz,  $\text{CDCl}_3$ ):  $\delta$  169.2, 139.6, 137.7, 135.3, 130.6, 129.1, 128.9, 128.5, 127.1, 76.1, 34.0, 21.3, 19.9.

HRMS (ESI-Q-orbitrap)  $m/z$ :  $[\text{M} + \text{Na}]^+$  calcd for  $\text{C}_{18}\text{H}_{19}\text{BrO}_2$  369.04606, found 369.04633.

#### 2-bromo-1-phenylethyl 2-bromobenzoate (**9da**)

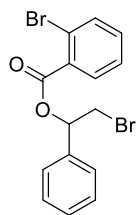

Yield: 90% (69.1 mg, colorless oil,  $R_f = 0.32$ , hexane/dichloromethane = 2:1).

IR (KBr): 3019, 1735, 1249, 1215, 755, 669  $\text{cm}^{-1}$ .



$^1\text{H}$  NMR (500 MHz,  $\text{CDCl}_3$ ):  $\delta$  7.92 (dd,  $J = 7.6, 1.6$  Hz, 1H), 7.68 (d,  $J = 7.9$  Hz, 1H), 7.46 (d,  $J = 7.6$  Hz, 2H), 7.33-7.43 (m, 5H), 6.23 (dd,  $J = 8.0, 4.6$  Hz, 1H), 3.82 (dd,  $J = 11.0, 8.0$  Hz, 1H), 3.73 (dd,  $J = 11.0, 4.6$  Hz, 1H).

$^{13}\text{C}\{^1\text{H}\}$  NMR (125 MHz,  $\text{CDCl}_3$ ):  $\delta$  164.9, 137.4, 134.7, 133.0, 131.8, 131.6, 129.1, 128.9, 127.4, 126.9, 122.1, 76.3, 34.3.

HRMS (ESI-Q-orbitrap)  $m/z$ :  $[\text{M} + \text{Na}]^+$  calcd for  $\text{C}_{15}\text{H}_{12}\text{Br}_2\text{O}_2$  406.90765, found 406.90749.

#### 2-bromo-1-phenylethyl 2-fluorobenzoate (**9ea**)

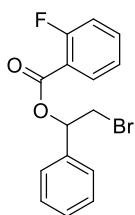

Yield: 99% (63.9 mg, colorless oil,  $R_f = 0.24$ , hexane/dichloromethane = 2:1).

IR (KBr): 3020, 1718, 1615, 1216, 756  $\text{cm}^{-1}$ .

$^1\text{H}$  NMR (500 MHz,  $\text{CDCl}_3$ ):  $\delta$  8.02 (td,  $J = 7.6, 1.8$  Hz, 1H), 7.52-7.57 (m, 1H), 7.45-7.49 (m, 2H), 7.34-7.42 (m, 3H), 7.23 (td,  $J = 7.8, 1.1$  Hz, 1H), 7.16 (ddd,  $J = 10.8, 8.4, 0.9$  Hz, 1H), 6.25 (dd,  $J = 8.1, 4.5$  Hz, 1H), 3.81 (dd,  $J = 10.9, 8.1$  Hz, 1H), 3.72 (dd,  $J = 10.9, 4.5$  Hz, 1H).

$^{13}\text{C}\{^1\text{H}\}$  NMR (125 MHz,  $\text{CDCl}_3$ ):  $\delta$  163.3, 163.3, 163.2, 161.2, 137.6, 135.0, 134.9, 132.4, 129.0, 128.9, 128.9, 126.8, 124.2, 124.1, 118.4, 118.3, 117.3, 117.1, 75.9, 34.5.

HRMS (ESI-Q-orbitrap)  $m/z$ :  $[\text{M} + \text{Na}]^+$  calcd for  $\text{C}_{15}\text{H}_{12}\text{BrFO}_2$  344.98969, found 344.98977.

#### 2-bromo-1-phenylethyl 4-nitrobenzoate (**9fa**)

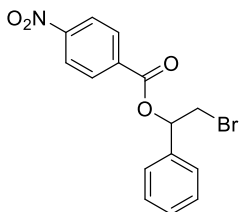

Yield: 69% (48.3 mg, colorless oil,  $R_f = 0.20$ , hexane/dichloromethane = 2:1).

$^1\text{H}$  NMR (500 MHz,  $\text{CDCl}_3$ ):  $\delta$  8.26-8.33 (m, 4H), 7.36-7.46 (m, 5H), 6.24 (dd,  $J = 8.4, 4.3$  Hz, 1H), 3.84 (dd,  $J = 11.1, 8.4$  Hz, 1H), 3.75 (dd,  $J = 11.1, 4.3$  Hz, 1H).

$^{13}\text{C}\{^1\text{H}\}$  NMR (125 MHz,  $\text{CDCl}_3$ ):  $\delta$  163.7, 150.9, 137.2, 135.2, 131.1, 129.4, 129.1, 126.7, 123.8, 76.6, 34.1.

HRMS (ESI-Q-orbitrap)  $m/z$ :  $[\text{M} + \text{Na}]^+$  calcd for  $\text{C}_{15}\text{H}_{12}\text{BrNO}_4$  371.98419, found 371.98425.

The data are in full accordance with the literature (Ng, W.-H.; Hu, R.-B.; Lam, Y.-P.; Yeung, Y.-Y. *Org. Lett.* **2020**, 22 (14), 5572–5576.).

2-bromo-1-phenylethyl 3-phenylpropanoate (**9ga**)

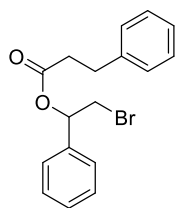

Yield: 96% (64.0 mg, yellow oil,  $R_f = 0.33$ , hexane/ethyl acetate = 20:1).

$^1\text{H}$  NMR (500 MHz,  $\text{CDCl}_3$ ):  $\delta$  7.36-7.41 (m, 3H), 7.28-7.35 (m, 4H), 7.20-7.25 (m, 3H), 6.03 (dd,  $J = 8.2, 4.7$  Hz, 1H), 3.65 (dd,  $J = 10.8, 8.2$  Hz, 1H), 3.59 (dd,  $J = 10.8, 4.7$  Hz, 1H), 2.97-3.07 (m, 2H), 2.70-2.83 (m, 2H).

$^{13}\text{C}\{^1\text{H}\}$  NMR (125 MHz,  $\text{CDCl}_3$ ):  $\delta$  171.8, 140.3, 137.7, 128.9, 128.8, 128.6, 128.4, 126.6, 126.4, 75.0, 35.9, 34.3, 30.9.

HRMS (ESI-Q-orbitrap)  $m/z$ :  $[\text{M} + \text{Na}]^+$  calcd for  $\text{C}_{17}\text{H}_{17}\text{BrO}_2$  355.03041, found 355.03031.

The data are in full accordance with the literature (Shi, Y.; Wong, J.; Ke, Z.; Yeung, Y.-Y. *J. Org. Chem.* **2019**, 84 (7), 4017–4024.).

## (E) Synthesis of olefinic acid substrates **1**

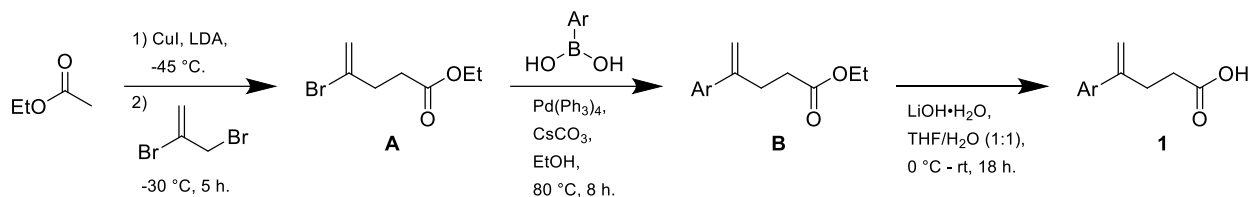

### General procedure.

**1. Preparation of LDA solution:** n-Butyllithium solution 1.58 M in hexanes (47.5 mL, 75.0 mmol) was added to a solution of diisopropylamine (10.5 mL, 75.0 mmol) in THF (25.0 mL) at  $-78\text{ }^{\circ}\text{C}$ . The resultant mixture was allowed to warm to room temperature over 2 hours.

**2. Enolate alkylation:** The LDA solution was added to a suspension of ethyl acetate (7.3 mL, 75.0 mmol) and copper (I) iodide (28.6 g, 150.0 mmol) in THF (75.0 mL) at  $-45\text{ }^{\circ}\text{C}$ . The resultant solution was warmed to  $-30\text{ }^{\circ}\text{C}$ . A solution of 2,3-dibromopropene (3.7 mL, 37.5 mmol) in THF (37.5 mL) was then added dropwise. The resultant mixture was stirred for an additional 5 hours at  $-30\text{ }^{\circ}\text{C}$ . The reaction was then quenched using a saturated aqueous ammonium chloride solution (20.0 mL), acidified to pH 2 with 1 M aqueous hydrogen chloride solution, and extracted with diethyl ether (3 x 20.0 mL). The organic extracts were then washed with 28% aqueous ammonia solution (3 x 10.0 mL), dried over anhydrous sodium sulfate, filtered, and concentrated *in vacuo* to give the intermediate **A**; which was used in the next step without further purification.

**3. Suzuki coupling:** A mixture of intermediate **A** (2.1 g, 10.0 mmol), aryl boronic acid (11.0 mmol), tetrakis(triphenylphosphine)-palladium(0) (0.6 g, 0.5 mmol), cesium carbonate (4.9 g, 15.0 mmol), in ethanol (50 mL) was degassed with nitrogen in a resealable tube. The sealed system was then heated to  $80\text{ }^{\circ}\text{C}$  for 8 hours. The resultant reaction mixture was filtered, concentrated *in vacuo* and purification by flash column chromatography in silica gel (hexane/ethyl acetate, 20:1) to give the intermediate **B**.

**4. Ester hydrolysis:** To a suspension of intermediate **B** (6.0 mmol), in a 1:1 mixture of THF and water (60.0 mL) at  $0\text{ }^{\circ}\text{C}$ , lithium hydroxide monohydrate (1.3 g, 30.0 mmol) was added in portions. The resultant mixture was warmed to room temperature and stirred for 18 hours. The product mixture was then acidified to pH < 4 with a 1 M hydrogen chloride aqueous solution, extracted with diethyl ether (3 x 10.0 mL) and washed with brine (3 x 5.0 mL). The organic fractions were concentrated *in vacuo* and recrystallized from a mixture of diethyl ether and hexane to give the alkenoic acid **1**.

4-phenylpent-4-enoic acid (**1a**)

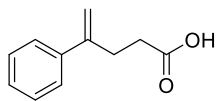

White solid.

$^1\text{H}$  NMR (500 MHz,  $\text{CDCl}_3$ ):  $\delta$  10.50 (br. s, 1H), 7.41 (d,  $J = 7.3$  Hz, 2H), 7.34 (t,  $J = 7.3$  Hz, 2H), 7.27-7.31 (m, 1H), 5.33 (s, 1H), 5.12 (s, 1H), 2.86 (t,  $J = 7.7$  Hz, 2H), 2.54 (t,  $J = 7.7$  Hz, 2H).

$^{13}\text{C}\{^1\text{H}\}$  NMR (125 MHz,  $\text{CDCl}_3$ ):  $\delta$  179.4, 146.6, 140.5, 128.6, 127.8, 126.2, 113.1, 33.1, 30.3.

HRMS (ESI-Q-orbitrap)  $m/z$ :  $[\text{M} - \text{H}]^-$  calcd for  $\text{C}_{11}\text{H}_{12}\text{O}_2$  175.07645, found 175.07630.

The data are in full accordance with the literature (Zhou, L.; Tan, C. K.; Jiang, X.; Chen, F.; Yeung, Y.-Y. *J. Am. Chem. Soc.* **2010**, *132* (44), 15474–15476.).

4-(p-tolyl)pent-4-enoic acid (**1b**)

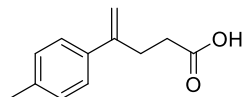

White solid.

$^1\text{H}$  NMR (500 MHz,  $\text{CDCl}_3$ ):  $\delta$  10.91 (br. s, 1H), 7.32 (d,  $J = 7.4$  Hz, 2H), 7.16 (d,  $J = 7.4$  Hz, 2H), 5.31 (s, 1H), 5.08 (s, 1H), 2.85 (t,  $J = 7.5$  Hz, 2H), 2.55 (t,  $J = 7.5$  Hz, 2H), 2.36 (s, 3H).

$^{13}\text{C}\{^1\text{H}\}$  NMR (125 MHz,  $\text{CDCl}_3$ ):  $\delta$  179.8, 146.4, 137.6, 137.5, 129.2, 126.1, 112.3, 33.2, 30.2, 21.2.

HRMS (ESI-Q-orbitrap)  $m/z$ :  $[\text{M} - \text{H}]^-$  calcd for  $\text{C}_{12}\text{H}_{14}\text{O}_2$  189.09210, found 189.09202.

The data are in full accordance with the literature (Zhou, L.; Tan, C. K.; Jiang, X.; Chen, F.; Yeung, Y.-Y. *J. Am. Chem. Soc.* **2010**, *132* (44), 15474–15476.).

4-(4-methoxyphenyl)pent-4-enoic acid (**1c**)

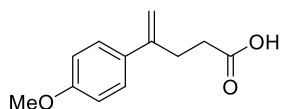

White solid.

$^1\text{H}$  NMR (500 MHz,  $\text{CDCl}_3$ ):  $\delta$  7.34 (d,  $J = 7.6$  Hz, 2H), 6.87 (d,  $J = 7.6$  Hz, 2H), 5.25 (s, 1H), 5.02 (s, 1H), 3.81 (s, 3H), 2.82 (t,  $J = 7.7$  Hz, 2H), 2.52 (t,  $J = 7.7$  Hz, 2H).

$^{13}\text{C}\{^1\text{H}\}$  NMR (125 MHz,  $(\text{CD}_3)_2\text{SO}$ ):  $\delta$  174.1, 159.0, 145.8, 132.4, 127.1, 114.0, 110.8, 55.3, 32.9, 29.8.

HRMS (ESI-Q-orbitrap)  $m/z$ :  $[\text{M}+\text{Na}]^+$  calcd for  $\text{C}_{12}\text{H}_{14}\text{O}_3$  229.08352, found 229.08351.

The data are in full accordance with the literature (Zhou, L.; Tan, C. K.; Jiang, X.; Chen, F.; Yeung, Y.-Y. *J. Am. Chem. Soc.* **2010**, *132* (44), 15474–15476.).

#### 4-(4-chlorophenyl)pent-4-enoic acid (**1d**)

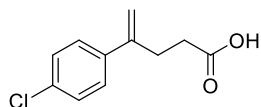

White solid.

$^1\text{H}$  NMR (500 MHz,  $\text{CDCl}_3$ ):  $\delta$  9.25 (br. s, 1H), 7.28–7.35 (m, 4H), 5.31 (s, 1H), 5.12 (m, 1H), 2.81 (t,  $J = 7.5$  Hz, 2H), 2.52 (t,  $J = 7.5$  Hz, 2H).

$^{13}\text{C}\{^1\text{H}\}$  NMR (125 MHz,  $\text{CDCl}_3$ ):  $\delta$  179.1, 145.5, 139.0, 133.6, 128.7, 127.5, 113.7, 32.9, 30.1.

HRMS (ESI-Q-orbitrap)  $m/z$ :  $[\text{M} - \text{H}]^-$  calcd for  $\text{C}_{11}\text{H}_{11}\text{ClO}_2$  209.03748, found 209.03744.

The data are in full accordance with the literature (Zhou, L.; Tan, C. K.; Jiang, X.; Chen, F.; Yeung, Y.-Y. *J. Am. Chem. Soc.* **2010**, *132* (44), 15474–15476.).

#### 4-(4-fluorophenyl)pent-4-enoic acid (**1e**)

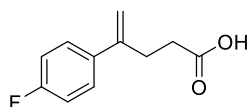

$^1\text{H}$  NMR (500 MHz,  $\text{CDCl}_3$ ):  $\delta$  11.02 (br. s, 1H), 7.37 (t,  $J = 6.3$  Hz, 2H), 7.03 (t,  $J = 7.9$  Hz, 2H), 5.28 (s, 1H), 5.10 (s, 1H), 2.82 (t,  $J = 7.5$  Hz, 2H), 2.53 (t,  $J = 7.5$  Hz, 2H).

$^{13}\text{C}\{^1\text{H}\}$  NMR (125 MHz,  $\text{CDCl}_3$ ):  $\delta$  179.8, 163.5, 161.6, 145.6, 136.6, 136.6, 127.9, 127.8, 115.5, 115.3, 113.1, 33.0, 30.3.

HRMS (ESI-Q-orbitrap) m/z:  $[M - H]^-$  calcd for  $C_{11}H_{11}FO_2$  193.06703, found 193.06691.

4-(4-(trifluoromethyl)phenyl)pent-4-enoic acid (**1f**)

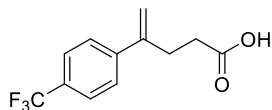

White solid.

$^1H$  NMR (500 MHz,  $CDCl_3$ ):  $\delta$  7.59 (d,  $J = 7.9$  Hz, 2H), 7.50 (d,  $J = 7.9$  Hz, 2H), 5.39 (s, 1H), 5.21 (s, 1H), 2.85 (t,  $J = 7.6$  Hz, 2H), 2.53 (t,  $J = 7.6$  Hz, 2H).

$^{13}C\{^1H\}$  NMR (125 MHz,  $CDCl_3$ ):  $\delta$  178.7, 145.6, 144.2, 129.8 (q,  $J = 32$  Hz), 126.6, 125.6 (q,  $J = 3.6$  Hz), 115.1, 32.8, 30.1.

HRMS (ESI-Q-orbitrap) m/z:  $[M - H]^-$  calcd for  $C_{12}H_{12}F_3O_2$  243.06384, found 243.06371.

The data are in full accordance with the literature (Zhou, L.; Tan, C. K.; Jiang, X.; Chen, F.; Yeung, Y.-Y. *J. Am. Chem. Soc.* **2010**, *132* (44), 15474–15476.).

4-(4-acetylphenyl)pent-4-enoic acid (**1g**)

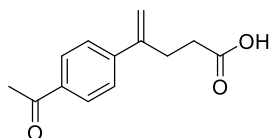

White solid.

$^1H$  NMR (500 MHz,  $CDCl_3$ ):  $\delta$  7.93 (d,  $J = 7.6$  Hz, 2H), 7.49 (d,  $J = 7.4$  Hz, 2H), 5.43 (s, 1H), 5.23 (s, 1H), 2.87 (t,  $J = 7.6$  Hz, 2H), 2.61 (s, 3H), 2.54 (t,  $J = 7.6$  Hz, 2H).

$^{13}C\{^1H\}$  NMR (125 MHz,  $CDCl_3$ ):  $\delta$  197.8, 177.6, 145.8, 145.3, 136.4, 128.7, 126.4, 115.2, 32.7, 30.0, 26.8.

HRMS (ESI-Q-orbitrap) m/z:  $[M+Na]^+$  calcd for  $C_{13}H_{14}O_3$  241.08345, found 241.08342.

(*E*)-5-phenylpent-4-enoic acid **1h**

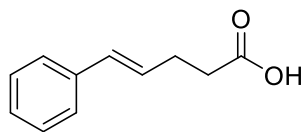

White solid.

$^1\text{H}$  NMR (500 MHz,  $\text{CDCl}_3$ ):  $\delta$  7.35 (d,  $J = 7.7$  Hz, 2H), 7.30 (t,  $J = 7.7$  Hz, 2H), 7.21 (t,  $J = 7.1$  Hz, 1H), 6.45 (d,  $J = 15.9$  Hz, 1H), 6.18-6.25 (m, 1H), 2.54-2.57 (m, 4H).

$^{13}\text{C}\{^1\text{H}\}$  NMR (125 MHz,  $\text{CDCl}_3$ ):  $\delta$  179.1, 137.4, 131.3, 128.7, 128.1, 127.4, 126.2, 33.9, 28.0.

HRMS (ESI-Q-orbitrap)  $m/z$ :  $[\text{M}-\text{H}]^-$  calcd for  $\text{C}_{11}\text{H}_{12}\text{O}_2$  175.07645, found 175.07651.

The data are in full accordance with the literature (Zhou, L.; Tan, C. K.; Jiang, X.; Chen, F.; Yeung, Y.-Y. *J. Am. Chem. Soc.* **2010**, *132* (44), 15474–15476.).

## Synthesis of olefinic mono-alcohol **5**

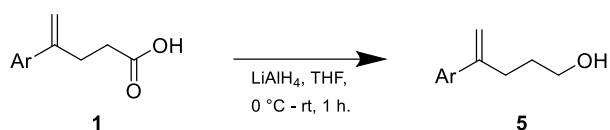

**General procedure.** To a solution of **1** (3.0 mmol) in anhydrous THF (6.0 mL) at  $0\text{ }^\circ\text{C}$  lithium aluminum hydride (0.2 g, 6.0 mmol) was added in portions. The resultant suspension was warmed to room temperature and stirred for 1 hour. The reaction was then quenched with a 2 M aqueous solution of sodium hydroxide (5.0 mL), filtered through a thin pad of celite, and extracted with diethyl ether (3 x 5 ml). The organic fractions were dried with anhydrous sodium sulfate, filtered, and concentrated *in vacuo*. Purification by flash column chromatography through silica gel yielded the alkenoic alcohol **5**.

### 4-phenylpent-4-en-1-ol (**5a**)

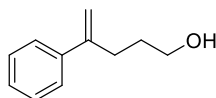

Colorless oil.

$^1\text{H}$  NMR (500 MHz,  $\text{CDCl}_3$ ):  $\delta$  7.42 (d,  $J = 7.8$  Hz, 2H), 7.34 (t,  $J = 7.2$  Hz, 2H), 7.25-7.30 (m, 1H), 5.31 (s, 1H), 5.11 (s, 1H), 3.65 (t,  $J = 6.5$  Hz, 2H), 2.61 (t,  $J = 7.5$  Hz, 2H), 1.68-1.77 (m, 3H).

$^{13}\text{C}\{^1\text{H}\}$  NMR (125 MHz,  $\text{CDCl}_3$ ):  $\delta$  148.02, 141.1, 128.4, 127.5, 126.2, 112.7, 62.4, 31.6, 31.2.

HRMS (ESI-Q-orbitrap)  $m/z$ :  $[\text{M}+\text{Na}]^+$  calcd for  $\text{C}_{11}\text{H}_{14}\text{O}$  185.09369, found 185.09375.

The data are in full accordance with the literature (Hornback, J. M.; Proehl, G. S. *J. Am. Chem. Soc.* **1979**, *101* (24), 7367–7373.)

### 4-(p-tolyl)pent-4-en-1-ol (**5b**)

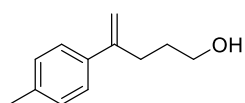

Yellow oil.



$^1\text{H}$  NMR (500 MHz,  $\text{CDCl}_3$ ):  $\delta$  7.33 (d,  $J = 7.5$  Hz, 2H), 7.15 (d,  $J = 7.5$  Hz, 2H), 5.29 (s, 1H), 5.07 (s, 1H), 3.66 (t,  $J = 6.4$  Hz, 2H), 2.60 (t,  $J = 7.5$  Hz, 2H), 2.36 (s, 3H), 1.69-1.77 (m, 2H), 1.67 (br. s, 1H).

$^{13}\text{C}\{^1\text{H}\}$  NMR (125 MHz,  $\text{CDCl}_3$ ):  $\delta$  147.8, 138.1, 137.3, 129.1, 126.1, 111.9, 62.5, 31.6, 31.2, 21.2.

HRMS (ESI-Q-orbitrap)  $m/z$ :  $[\text{M}+\text{Na}]^+$  calcd for  $\text{C}_{12}\text{H}_{16}\text{O}$  199.10934, found 199.10952.

The data are in full accordance with the literature (Rösner, C.; Hennecke, U. *Org. Lett.* **2015**, *17* (13), 3226–3229.).

#### 4-(4-methoxyphenyl)pent-4-en-1-ol (**5c**)

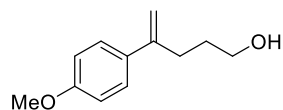

Yellow oil.

$^1\text{H}$  NMR (500 MHz,  $\text{CDCl}_3$ ):  $\delta$  7.36 (d,  $J = 8.7$  Hz, 2H), 6.86 (d,  $J = 8.7$  Hz, 2H), 5.23 (s, 1H), 5.01 (s, 1H), 3.81 (s, 3H), 3.65 (t,  $J = 6.4$  Hz, 2H), 2.57 (t,  $J = 7.5$  Hz, 2H), 1.639-1.75 (m, 2H), 1.59 (br. s, 1H).

$^{13}\text{C}\{^1\text{H}\}$  NMR (125 MHz,  $\text{CDCl}_3$ ):  $\delta$  159.1, 147.29, 133.4, 127.3, 113.8, 111.1, 62.5, 55.4, 31.7, 31.3.

HRMS (ESI-Q-orbitrap)  $m/z$ :  $[\text{M}+\text{H}]^+$  calcd for  $\text{C}_{12}\text{H}_{16}\text{O}_2$  193.12231, found 193.12252.

The data are in full accordance with the literature (Rösner, C.; Hennecke, U. *Org. Lett.* **2015**, *17* (13), 3226–3229.).

#### 4-(4-chlorophenyl)pent-4-en-1-ol (**5d**)

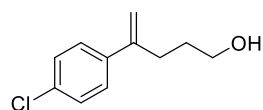

Colorless oil.

$^1\text{H}$  NMR (500 MHz,  $\text{CDCl}_3$ ):  $\delta$  7.34 (d,  $J = 7.7$  Hz, 2H), 7.29 (d,  $J = 7.7$  Hz, 2H), 5.28 (s, 1H), 5.11 (s, 1H), 3.66 (t,  $J = 6.3$  Hz, 2H), 2.58 (t,  $J = 7.5$  Hz, 2H), 1.67-1.74 (m, 2H), 1.41 (br. s, 1H).

$^{13}\text{C}\{^1\text{H}\}$  NMR (125 MHz,  $\text{CDCl}_3$ ):  $\delta$  146.9, 139.5, 133.3, 128.6, 127.5, 113.2, 62.4, 31.6, 31.1.

HRMS (ESI-Q-orbitrap) m/z: [M+H]<sup>+</sup> calcd for C<sub>12</sub>H<sub>13</sub>ClO 197.07277, found 197.07285.

The data are in full accordance with the literature (Tsuji, N.; Kennemur, J. L.; Buyck, T.; Lee, S.; Prévost, S.; Kaib, P. S. J.; Bykov, D.; Farès, C.; List, B. *Science*. **2018**, *359* (6383), 1501–1505.).

4-(4-fluorophenyl)pent-4-en-1-ol (**5e**)

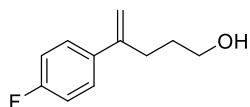

Yellow oil.

<sup>1</sup>H NMR (500 MHz, CDCl<sub>3</sub>): δ 7.34-7.39 (m, 2H), 7.00 (t, *J* = 8.0 Hz, 2H), 5.24 (s, 1H), 5.07 (s, 1H), 3.64 (t, *J* = 6.3, 2H), 2.57 (t, *J* = 7.5 Hz, 2H), 1.80 (br. s, 1H), 1.70 (m, 2H).

<sup>13</sup>C{<sup>1</sup>H} NMR (125 MHz, CDCl<sub>3</sub>): δ 163.3, 161.4, 137.1, 137.1, 127.8, 127.7, 115.3, 115.1, 112.6, 62.3, 31.7, 31.1.

HRMS (ESI-Q-orbitrap) m/z: [M+H]<sup>+</sup> calcd for C<sub>12</sub>H<sub>13</sub>FO 181.10232, found 181.10239.

The data are in full accordance with the literature (Rösner, C.; Hennecke, U. *Org. Lett.* **2015**, *17* (13), 3226–3229.).

4-(4-(trifluoromethyl)phenyl)pent-4-en-1-ol (**5f**)

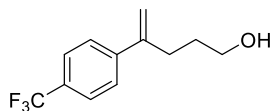

Colorless oil.

<sup>1</sup>H NMR (500 MHz, CDCl<sub>3</sub>): δ 7.58 (d, *J* = 8.4 Hz, 2H), 7.50 (d, *J* = 8.4 Hz, 2H), 5.36 (s, 1H), 5.20 (s, 1H), 3.67 (t, *J* = 6.4 Hz, 2H), 2.62 (t, *J* = 7.2 Hz, 2H), 1.68-1.75 (m, 2H), 1.50 (br. s, 1H).

<sup>13</sup>C{<sup>1</sup>H} NMR (125 MHz, CDCl<sub>3</sub>): δ 147.0, 144.8, 129.5 (q, *J* = 32 Hz), 126.5, 125.4 (q, *J* = 4 Hz), 114.6, 62.3, 31.5, 31.1.

HRMS (ESI-Q-orbitrap) m/z: [M-H]<sup>-</sup> calcd for C<sub>12</sub>H<sub>13</sub>F<sub>3</sub>O 229.08457, found 229.08467.

4-(3,5-bis(trifluoromethyl)phenyl)pent-4-en-1-ol (**5g**)

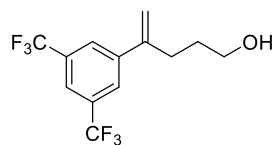

Colorless oil.

$^1\text{H}$  NMR (500 MHz,  $\text{CDCl}_3$ ):  $\delta$  7.83 (s, 2H), 7.77 (s, 1H), 5.42 (s, 1H), 5.28 (s, 1H), 3.69 (t,  $J = 6.4$  Hz, 2H), 2.63 (t,  $J = 7.6$  Hz, 2H), 1.68-1.78 (m, 3H).

$^{13}\text{C}\{^1\text{H}\}$  NMR (125 MHz,  $\text{CDCl}_3$ ):  $\delta$  145.7, 134.5, 131.8 (q,  $J = 33$  Hz), 126.3, 123.5 (q,  $J = 271$  Hz), 121.2 (m), 115.8, 62.1, 31.2, 30.9.

HRMS (ESI-Q-orbitrap)  $m/z$ :  $[\text{M}-\text{H}]^-$  calcd for  $\text{C}_{13}\text{H}_{12}\text{F}_6\text{O}$  297.07196, found 297.07153.

**(F) <sup>1</sup>H NMR of filter purified products and recovered imide by-products**

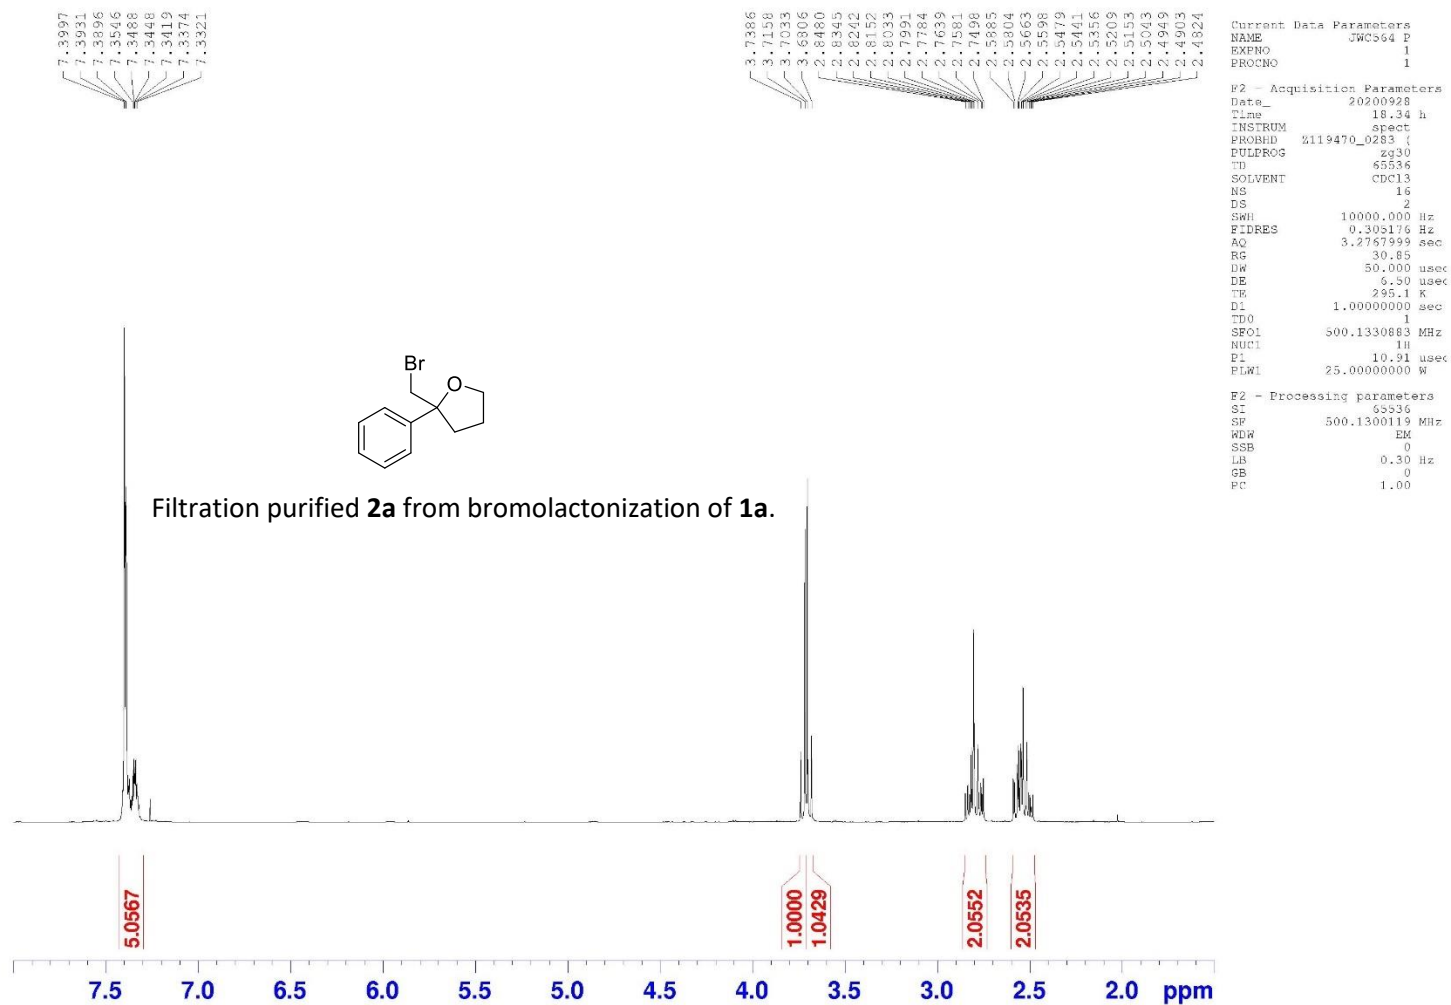

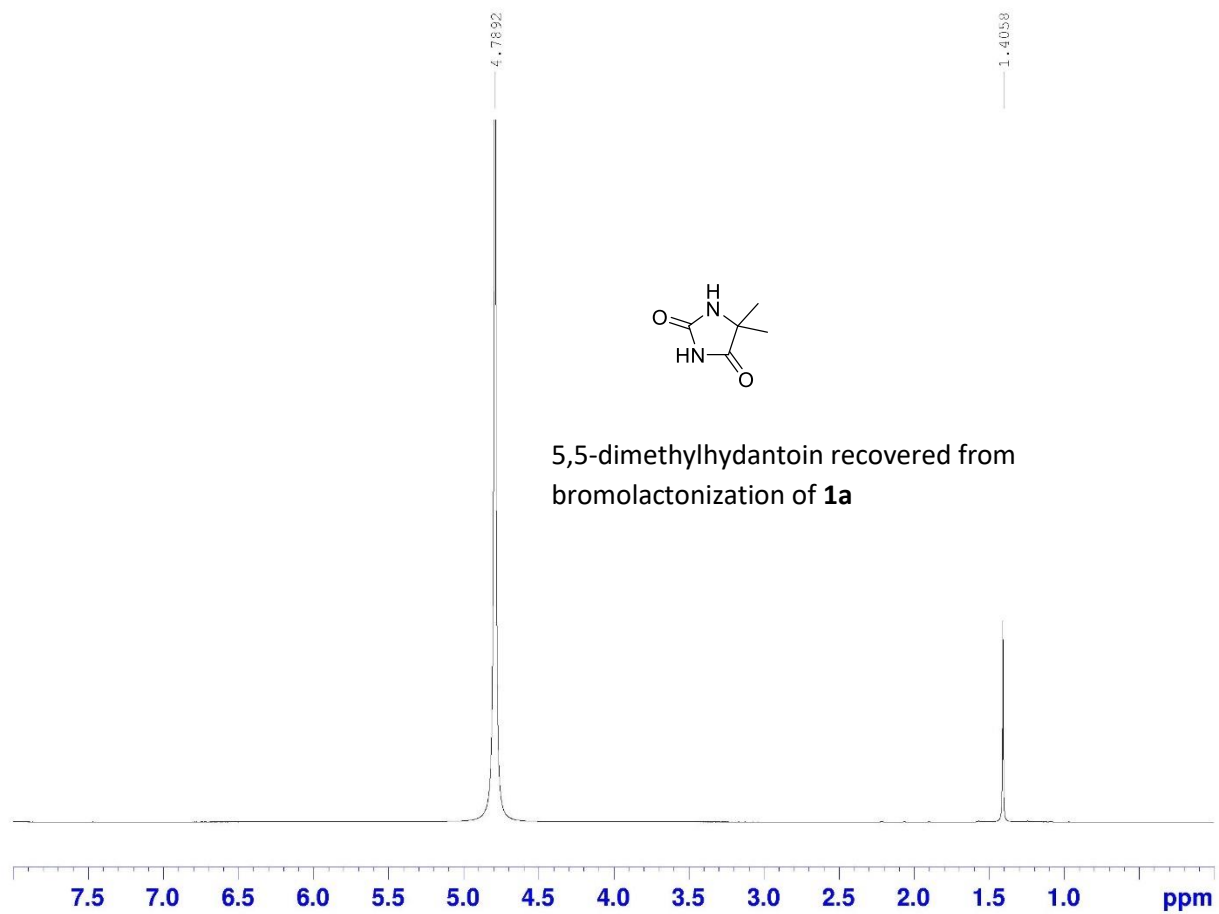

```

Current Data Parameters
NAME          JWC364H D20
EXPNO        1
PROCNO       1

F2 - Acquisition Parameters
Data_        20200930
Time_        16.53 h
INSTRUM      spect
PROBHD       %S20201_0170
PULPROG      zg30
TD           65536
SOLVENT      D2O
NS           16
DS           2
SWH          8012.820 Hz
FIDRES       0.244832 Hz
AQ           4.0894465 sec
RG           32
DW           62.400 usec
DE           6.50 usec
TE           295.0 K
D1           1.00000000 sec
TD0          1
SFO1         400.1324708 MHz
NUC1         1H
P1           6.75 usec
PLW1         13.17700005 W

F2 - Processing parameters
SI           65536
SF           400.1299549 MHz
WDW          EM
SSB          0
LB           0.30 Hz
GB           0
PC           1.00

```

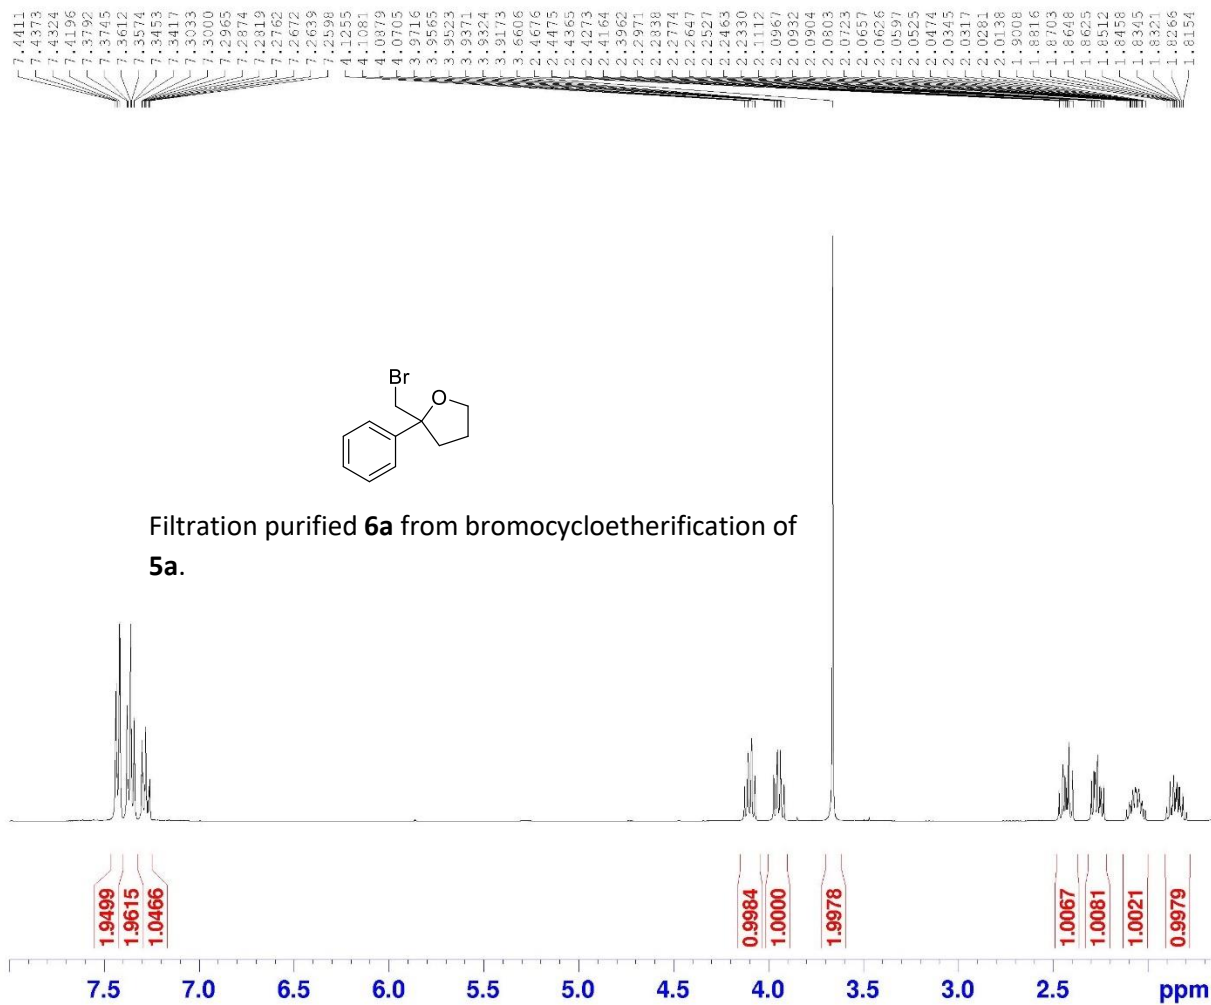

```

Current Data Parameters
NAME          JWC617P filter
EXPNO        1
PROCNO       1

F2 - Acquisition Parameters
Data_        20201207
Time_       13.39 h
INSTRUM     spect
PROBHD      %S20201_0170
PULPROG     zg30
TD          65536
SOLVENT     CDCl3
NS          16
DS          2
SWH         8012.820 Hz
FIDRES     0.244832 Hz
AQ         4.0894465 sec
RG          32
DW         62.400 usec
DE         6.50 usec
TE         294.0 K
D1         1.00000000 sec
TD0        1
SFO1       400.1324708 MHz
NUC1       131
P1         6.75 usec
PLW1       13.17700005 W

F2 - Processing parameters
SI         65536
SF         400.1300096 MHz
WDW        EM
SSB        0
LB         0.30 Hz
GB         0
PC         1.00
  
```

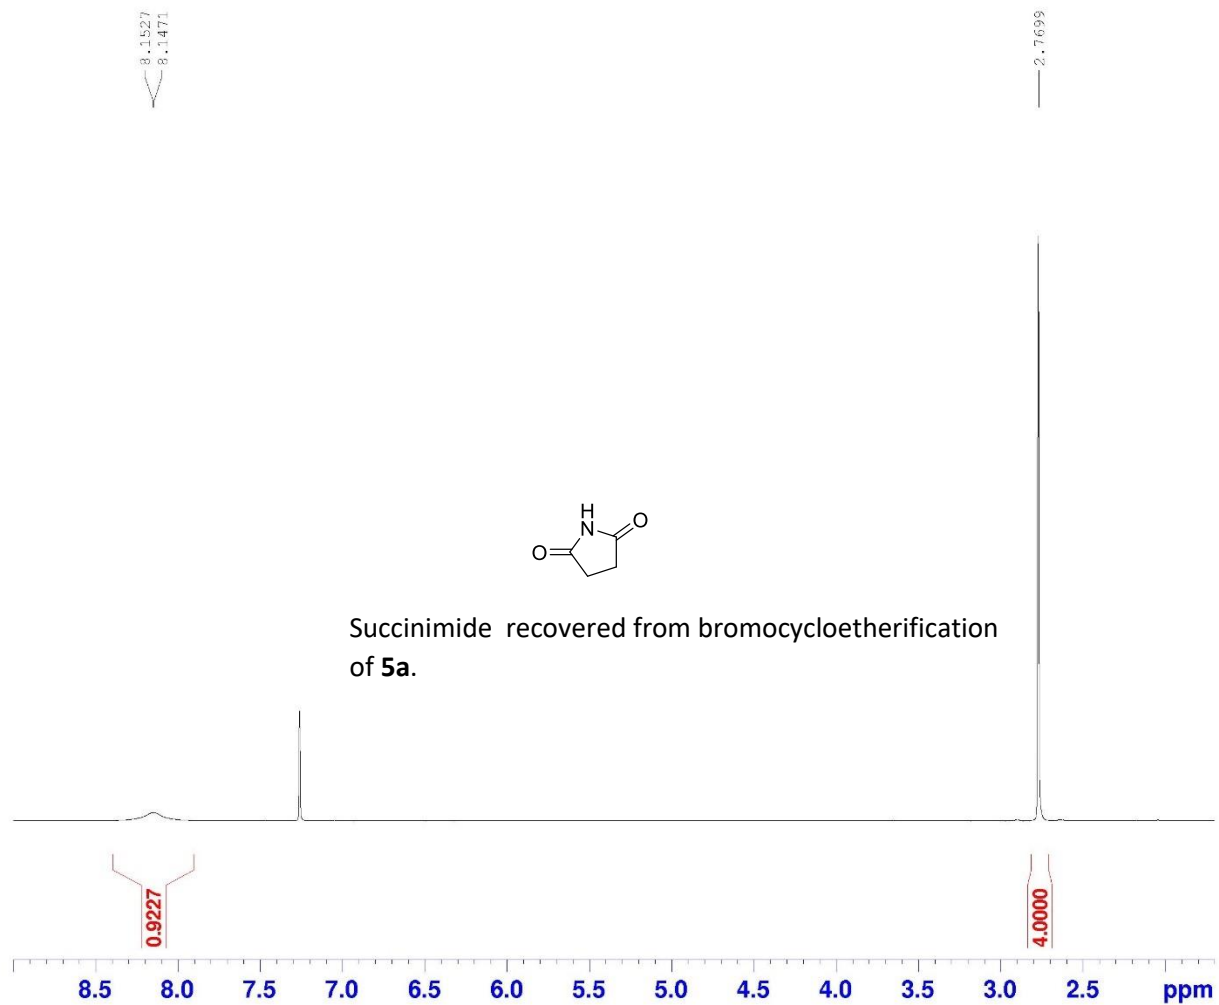

```

Current Data Parameters
NAME          JWC517 Sx
EXPNO        1
PROCNO       1

F2 - Acquisition Parameters
Date_        20201214
Time_        18.37 h
INSTRUM      spect
PROBHD       Z119470_0283
PULPROG      zg30
TD           65536
SOLVENT      CDCl3
NS           16
DS           2
SWH          10000.000 Hz
FIDRES       0.305176 Hz
AQ           3.2767999 sec
RG           142.5
DW           50.000 usec
DE           6.50 usec
TE           295.1 K
D1           1.00000000 sec
TD0          1
SFO1         500.1330883 MHz
NUC1         1H
P1           10.91 usec
PL1          25.00000000 W

F2 - Processing parameters
SI           65536
SF           500.1300121 MHz
WDW          EM
SSB          0
LB           0.30 Hz
GB           0
PC           1.00
  
```

8.0782  
8.0636  
7.5802  
7.5655  
7.5506  
7.4649  
7.4493  
7.4340

5.1495  
5.1408  
5.1316  
5.1228  
5.1135  
5.1047  
4.1795  
4.1709  
4.1588  
4.1527  
4.1407  
4.1321  
2.4282  
2.4199  
2.4103  
2.4005  
2.3925  
2.3876  
2.2997  
2.2924  
2.2893  
2.2838  
2.2800  
2.2749  
2.2713  
2.2649  
2.2616  
1.9850  
1.9774  
1.9628  
1.9563  
1.9501  
1.9407  
1.9346  
1.9285  
1.9135  
1.9064  
1.8984

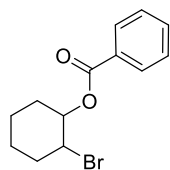

Filtration purified **9ah** from bromoesterification of **7a** and **8h**..

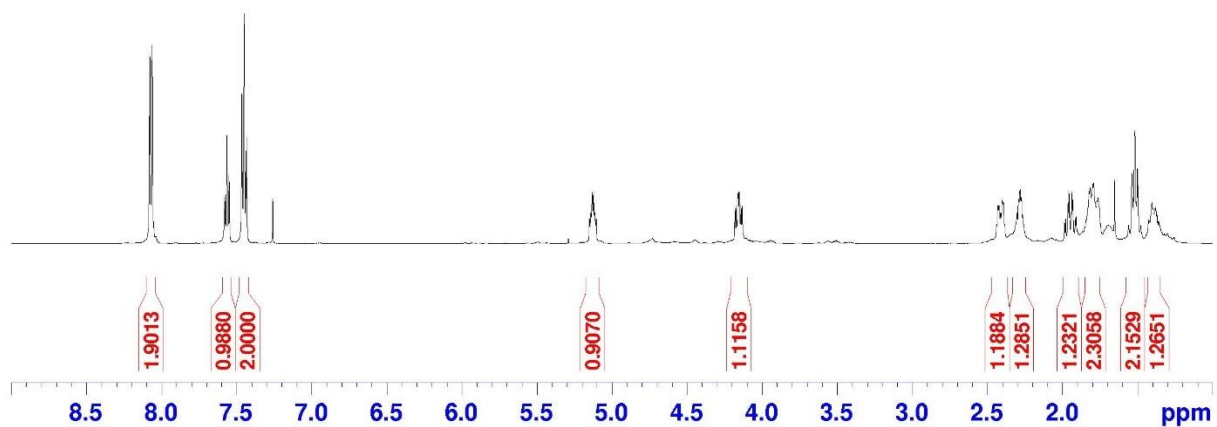

```

Current Data Parameters
NAME: JNMR011 filter recovery example
EXPNO: 1
PROCNO: 1

F2 - Acquisition Parameters
Date_ : 20221115
Time : 15.07 h
INSTRUM : spect
PROBHD : E119476_0283 (
PULPROG : zgpg
TD : 65536
SOLVENT : CDCl3
NS : 16
DS : 4
SWH : 10260.000 Hz
FIDRES : 0.355274 Hz
AQ : 3.1707999 sec
RG : 38.85
OR : 50.000 usec
DE : 5.00 usec
TE : 298.15 K
NUC1 : 13C
P1 : 1.00000000 sec
PCPD : 510.1330882 MHz
MPC1 : 18
PI : 18.83 usec
P181 : 22.00000000 W

F2 - Processing parameters
SI : 65536
SF : 510.1330882 MHz
WDW : EM
SSB : 0
LB : 0.30 Hz
GB : 0
PC : 1.00
  
```



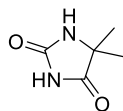

5,5-dimethylhydantoin recovered from  
bromoesterification of **7a** and **8h**.

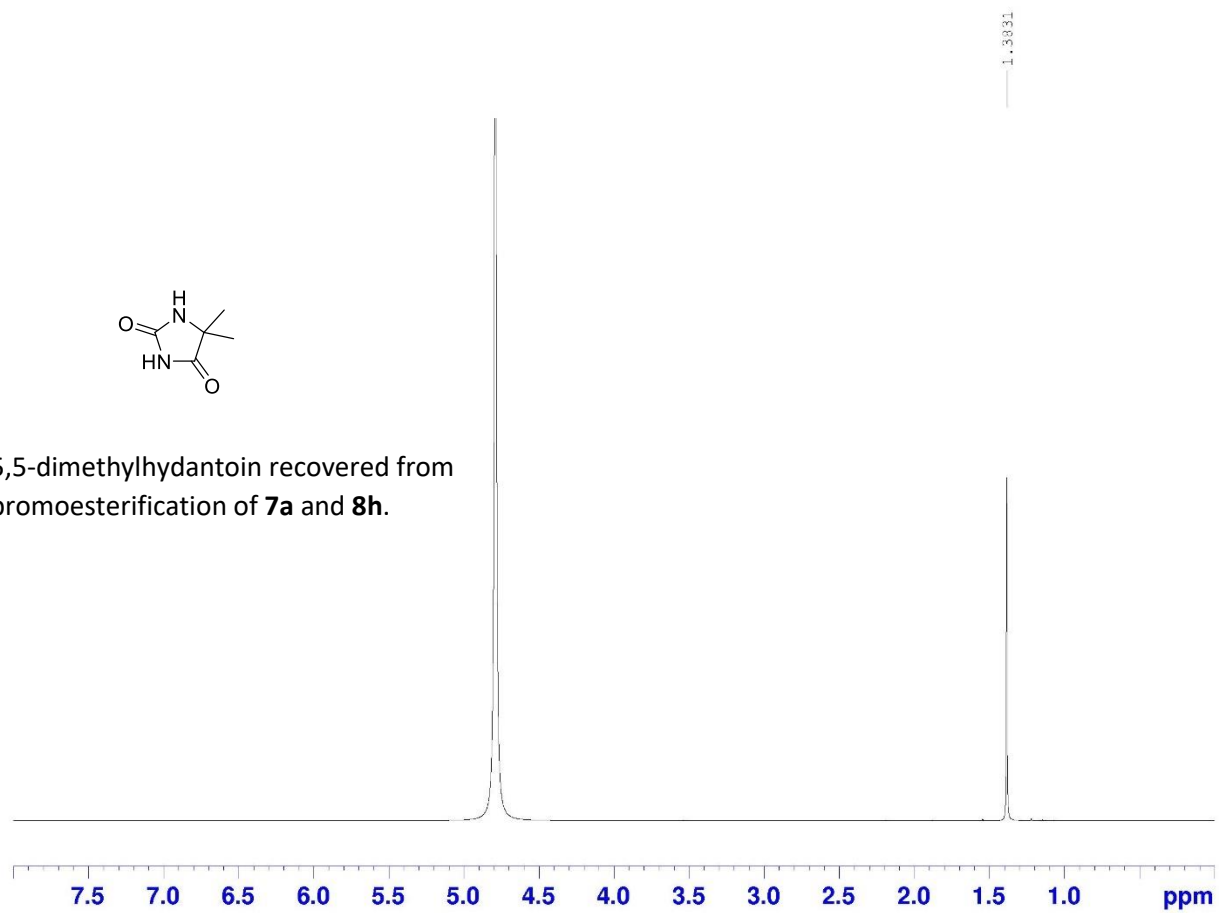

```
Current Data Parameters
NAME      JWC600IIR Q D2O
EXPNO    2
PROCNO   1

F2 - Acquisition Parameters
Data_    20201207
Time     13.50 h
INSTRUM  spect
PROBHD   %S20201_0170
PULPROG  zg30
TD       65536
SOLVENT  D2O
NS       16
DS       2
SWH      8012.820 Hz
FIDRES   0.244832 Hz
AQ       4.0894465 sec
RG       32
DW       62.400 usec
DE       6.50 usec
TE       294.0 K
D1       1.0000000 sec
TD0      1
SFO1     400.1324708 MHz
NUC1     1H
P1       6.75 usec
PLW1     13.17700005 W

F2 - Processing parameters
SI       65536
SF       400.1299537 MHz
WDW      EM
SSB      0
LB       0.30 Hz
GB       0
PC       1.00
```

(G)  $^1\text{H}$  and  $^{13}\text{C}$  NMR Spectra

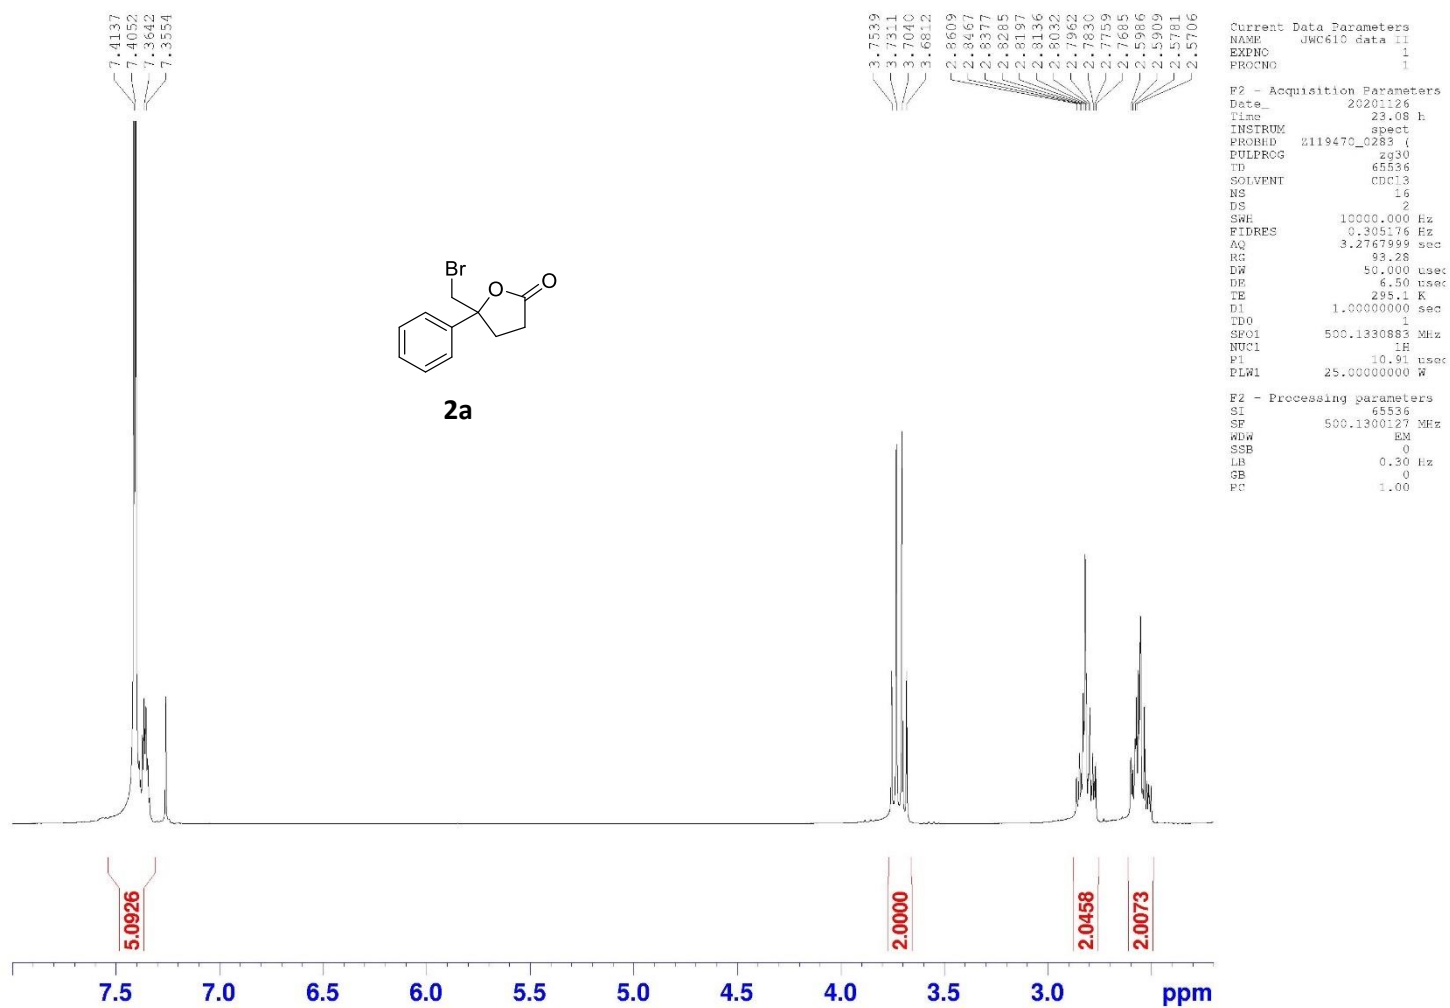

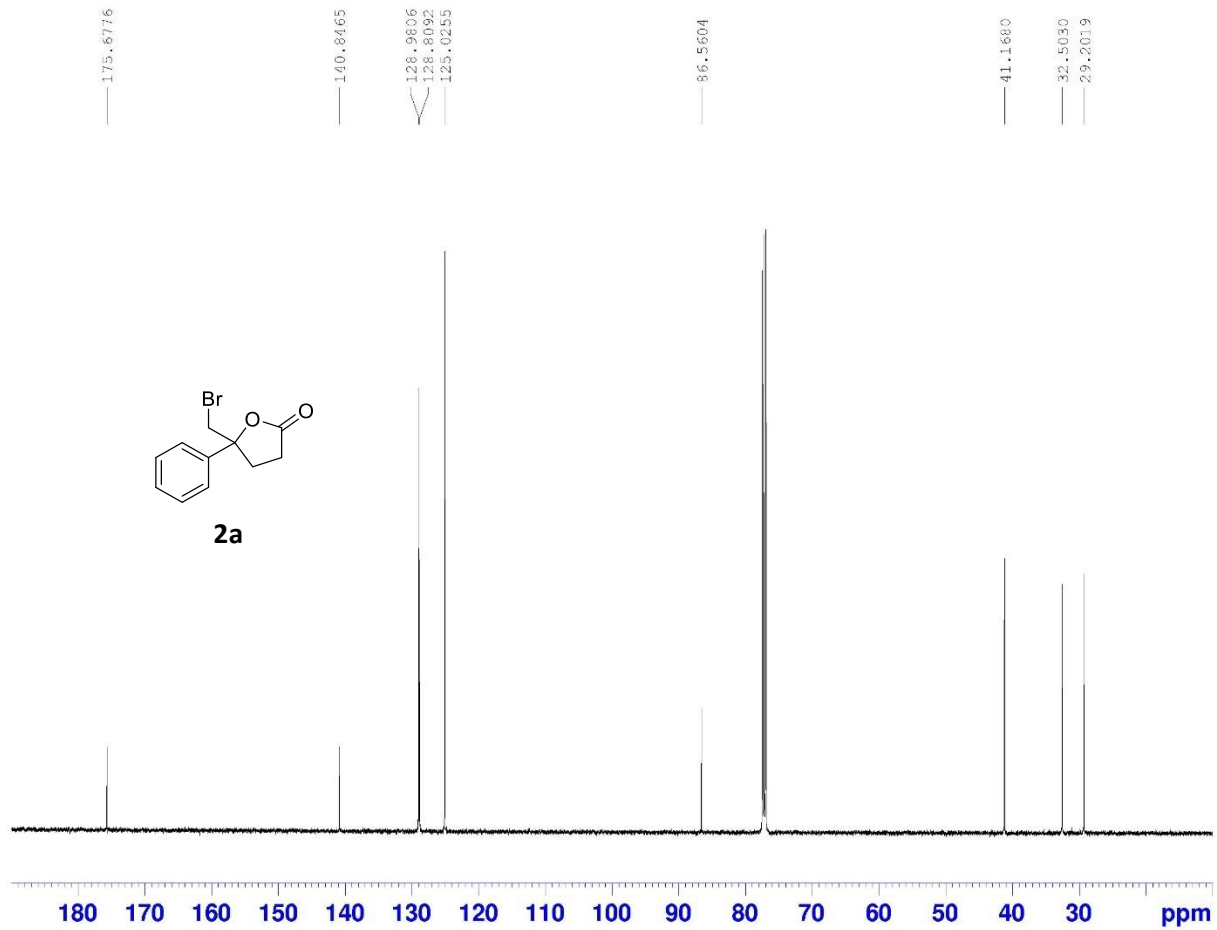

```

Current Data Parameters
NAME      JWC610 data 11
EXPNO    2
PROCNO   1

F2 - Acquisition Parameters
Data_    20201126
Time     23.51 h
INSTRUM  spect
PROBHD   W119470_0283
PULPROG  zgpg30
TD       65536
SOLVENT  CDCl3
NS       800
DS       4
SWH      23751.904 Hz
FIDRES   0.308261 Hz
AQ       1.1010048 sec
RG       205.72
DW       16.800 usec
DE       6.50 usec
TE       295.2 K
D1       2.0000000 sec
D11      0.0300000 sec
TD0      1
SFO1     125.7703643 MHz
NUC1     13C
P1       9.75 usec
PLW1     94.0000000 W
SFO2     500.1320005 MHz
NUC2     1H
CFDPRG[2] waltz16
PCPD2    80.00 usec
PLW2     25.0000000 W
PLW12    0.46495000 W
ELW13    0.23387000 W

F2 - Processing parameters
SI       32768
SF       125.7577762 MHz
AQW      BM
SSE      0
LA       1.00 Hz
GB       0
PC       1.40

```

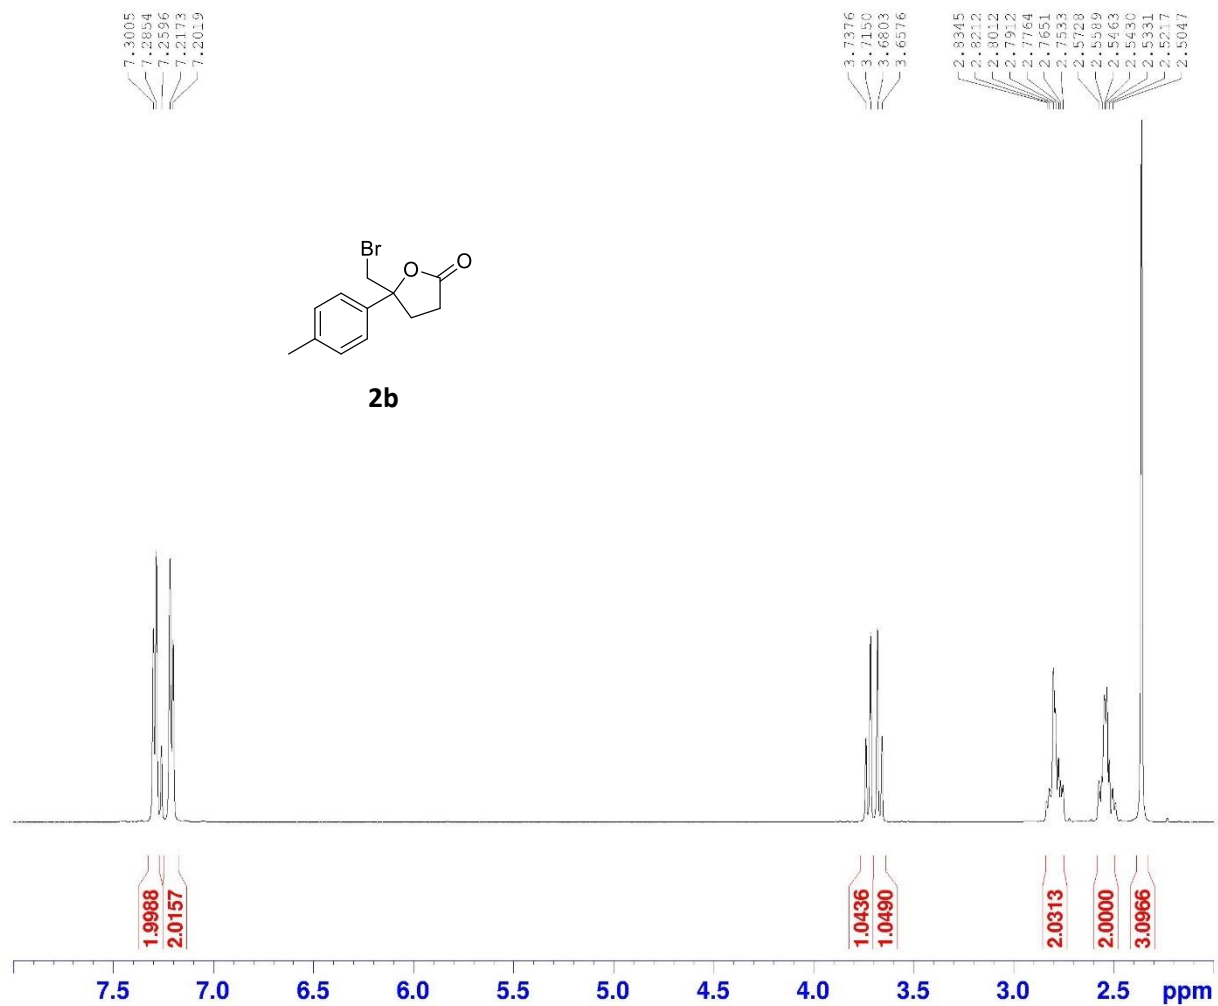

Current Data Parameters  
 NAME JMC624 data  
 EXPNO 1  
 PROCNO 1

F2 - Acquisition Parameters  
 Date\_ 20201211  
 Time 20.37 h  
 INSTRUM spect  
 PROBHD Z119470\_0283 ( )  
 PULPROG zg30  
 TD 65536  
 SOLVENT CDCl3  
 NS 16  
 DS 2  
 SWH 10000.000 Hz  
 FIDRES 0.305176 Hz  
 AQ 3.2767999 sec  
 RG 93.28  
 DW 50.000 usec  
 DE 6.50 usec  
 TE 295.2 K  
 D1 1.00000000 sec  
 TDO 1  
 SFO1 500.1330883 MHz  
 NUC1 1H  
 F1 10.91 usec  
 PLW1 25.00000000 W

F2 - Processing parameters  
 SI 65536  
 SF 500.1330123 MHz  
 WDW EM  
 SSB 0  
 LB 0.30 Hz  
 GB 0  
 FC 1.00

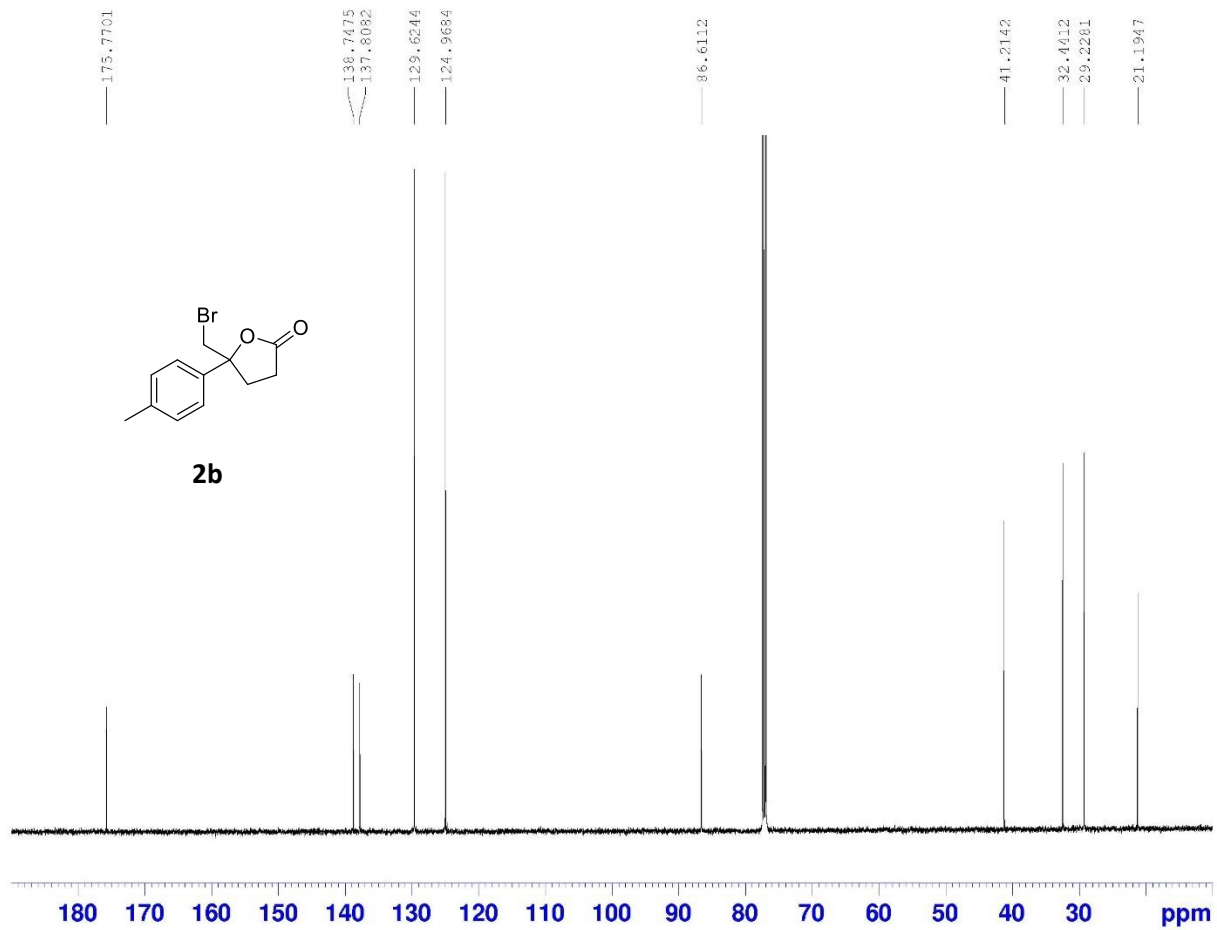

```

Current Data Parameters
NAME          JWC524 data
EXPNO        2
PROCNO       1

F2 - Acquisition Parameters
Data_        20201211
Time_        21.31 h
INSTRUM      spect
PROBHD       W119470_0283
PULPROG      zgpg30
TD           65536
SOLVENT      CDC13
NS           1024
DS           4
SWH          23761.904 Hz
FIDRES       0.308261 Hz
AQ           1.1010048 sec
RG           206.72
DW           16.800 usec
DE           6.50 usec
TE           295.2 K
D1           2.0000000 sec
D11          0.0300000 sec
TD0          1
SFO1         125.7703643 MHz
NUC1         13C
P1           9.75 usec
PLW1         94.0000000 W
SFO2         500.1320005 MHz
NUC2         1H
CFDPRG[2]    waltz16
PCPD2        80.00 usec
PLW2         25.0000000 W
PLW12        0.46495000 W
ELW13        0.23387000 W

F2 - Processing parameters
SI           32768
SF           125.7665657 MHz
AQW          BM
SSE          0
LA           1.00 Hz
GB           0
PC           1.40

```

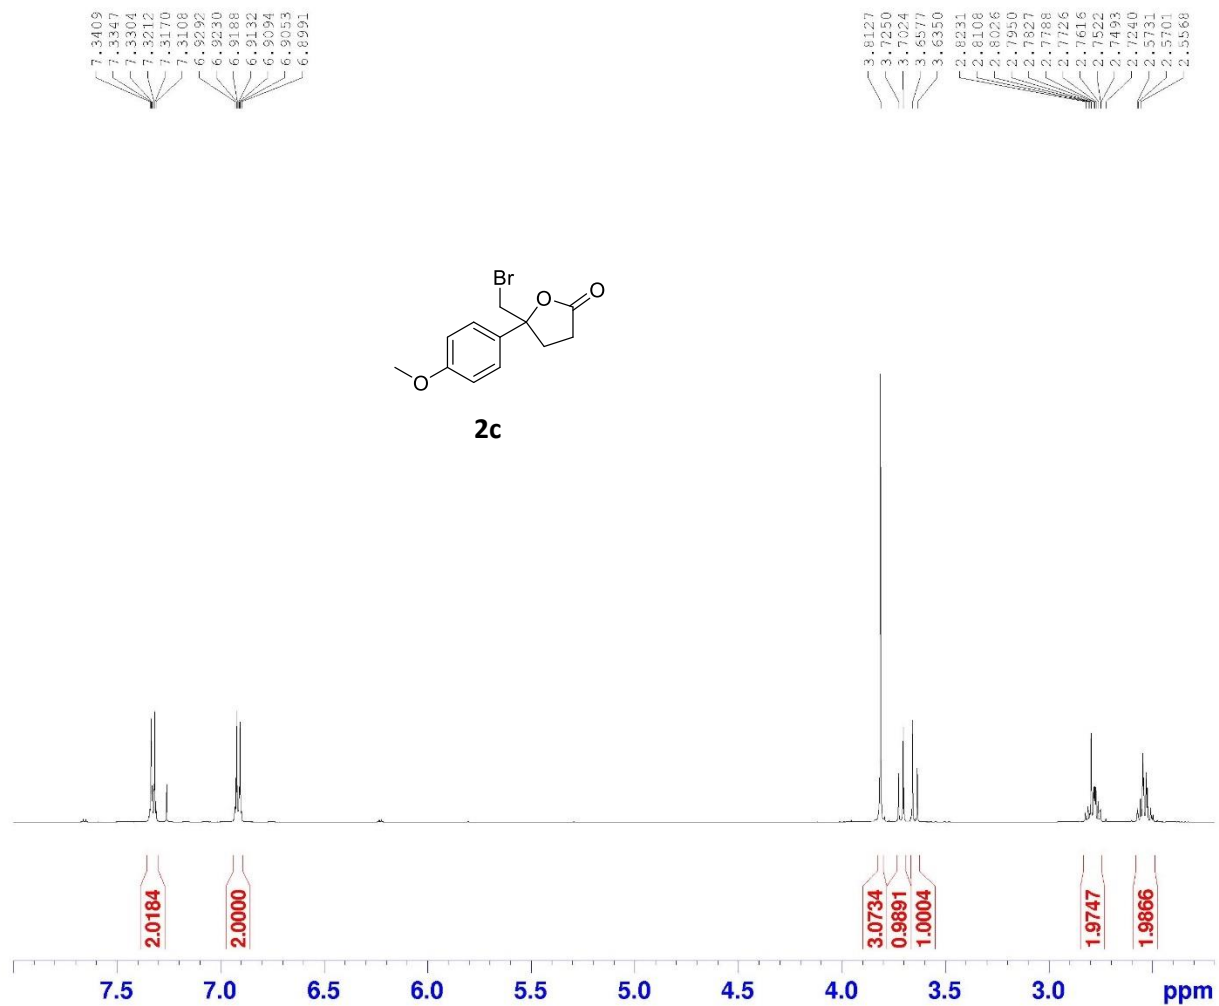

Current Data Parameters  
 NAME JWC468 data  
 EXPNO 1  
 PROCNO 1

F2 - Acquisition Parameters  
 Date\_ 20201116  
 Time 18.22 h  
 INSTRUM spect  
 PROBRD M119470\_0283  
 EULPROG zg30  
 TD 65536  
 FIDRES 0.305176 Hz  
 AQ 3.2767999 sec  
 RG 83.35  
 DW 50.000 usec  
 DE 6.50 usec  
 TE 295.2 K  
 D1 1.00000000 sec  
 TD0 1  
 SPOL 500.1330683 MHz  
 NUC1 1H  
 P1 10.91 usec  
 PLW1 25.00000000 W

F2 - Processing parameters  
 SZ 65536  
 SF 500.1300125 MHz  
 WDW EM  
 SSB 0  
 LB 0.30 Hz  
 GB 0  
 PC 1.00

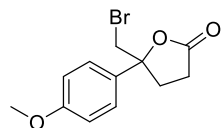

**2c**

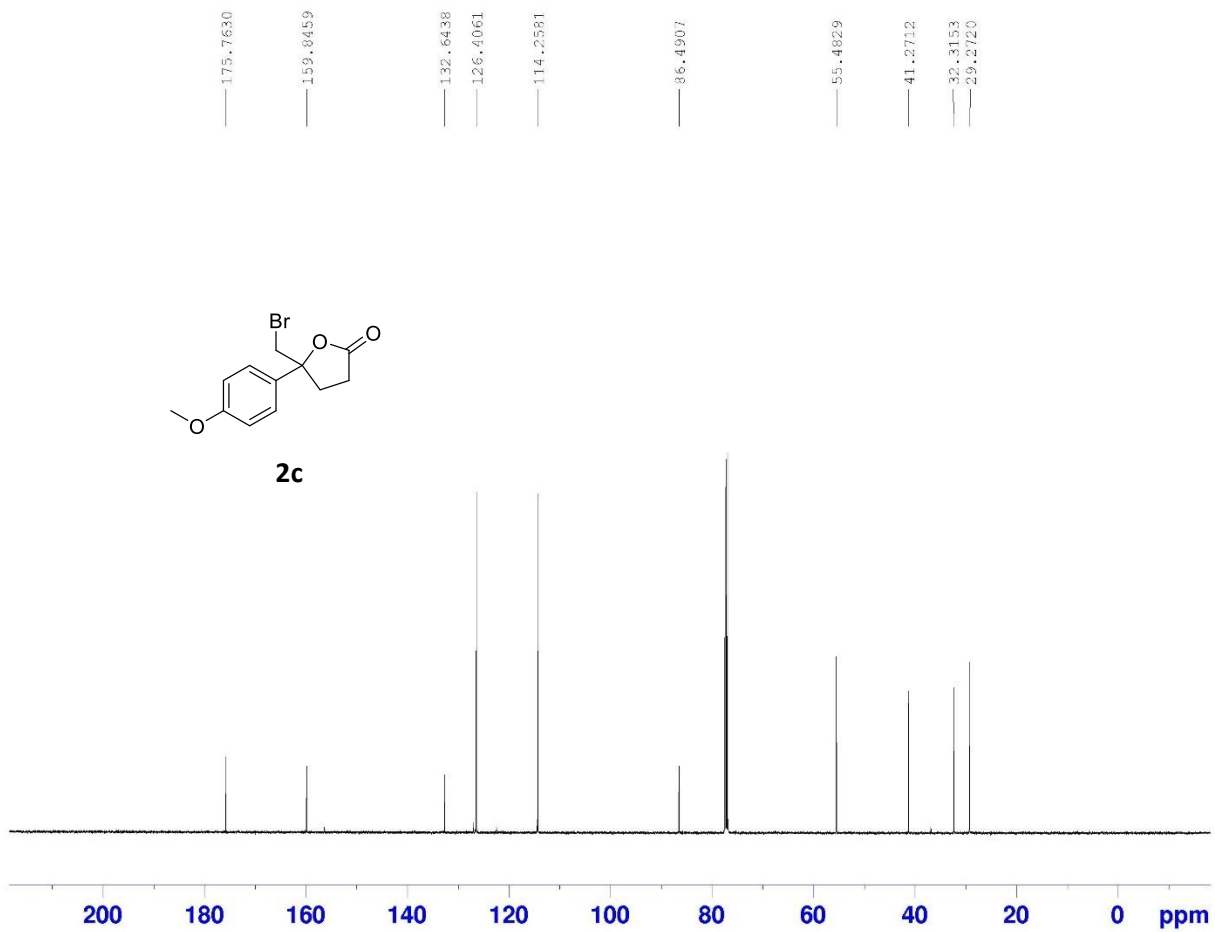

```

Current Data Parameters
NAME      JWC468 data
EXPNO    2
PROCNO    1

F2 - Acquisition Parameters
Data_     20201116
Time      21.10 h
INSTRUM   spect
PROBHD    W119470_0283
PULPROG   zgpg30
TD         55536
SOLVENT   CDCl3
NS         700
DS         4
SWH        23761.904 Hz
FIDRES     0.308261 Hz
AQ         1.1010048 sec
RG         206.72
DW         16.800 usec
DE         6.50 usec
TE         295.2 K
D1         2.0000000 sec
D11        0.0300000 sec
TD0        1
SFO1       125.7703643 MHz
NUC1       13C
P1         9.75 usec
PLW1       94.0000000 W
SFO2       500.1320005 MHz
NUC2       1H
CPDPRG[2] waltz16
PCPD2      80.00 usec
PLW2       25.0000000 W
PLW12      0.46495000 W
PLW13      0.23387000 W

F2 - Processing parameters
SI         32768
SF         125.7577761 MHz
AQW        BM
SSE        0
LA         1.00 Hz
GB         0
PC         1.40
  
```

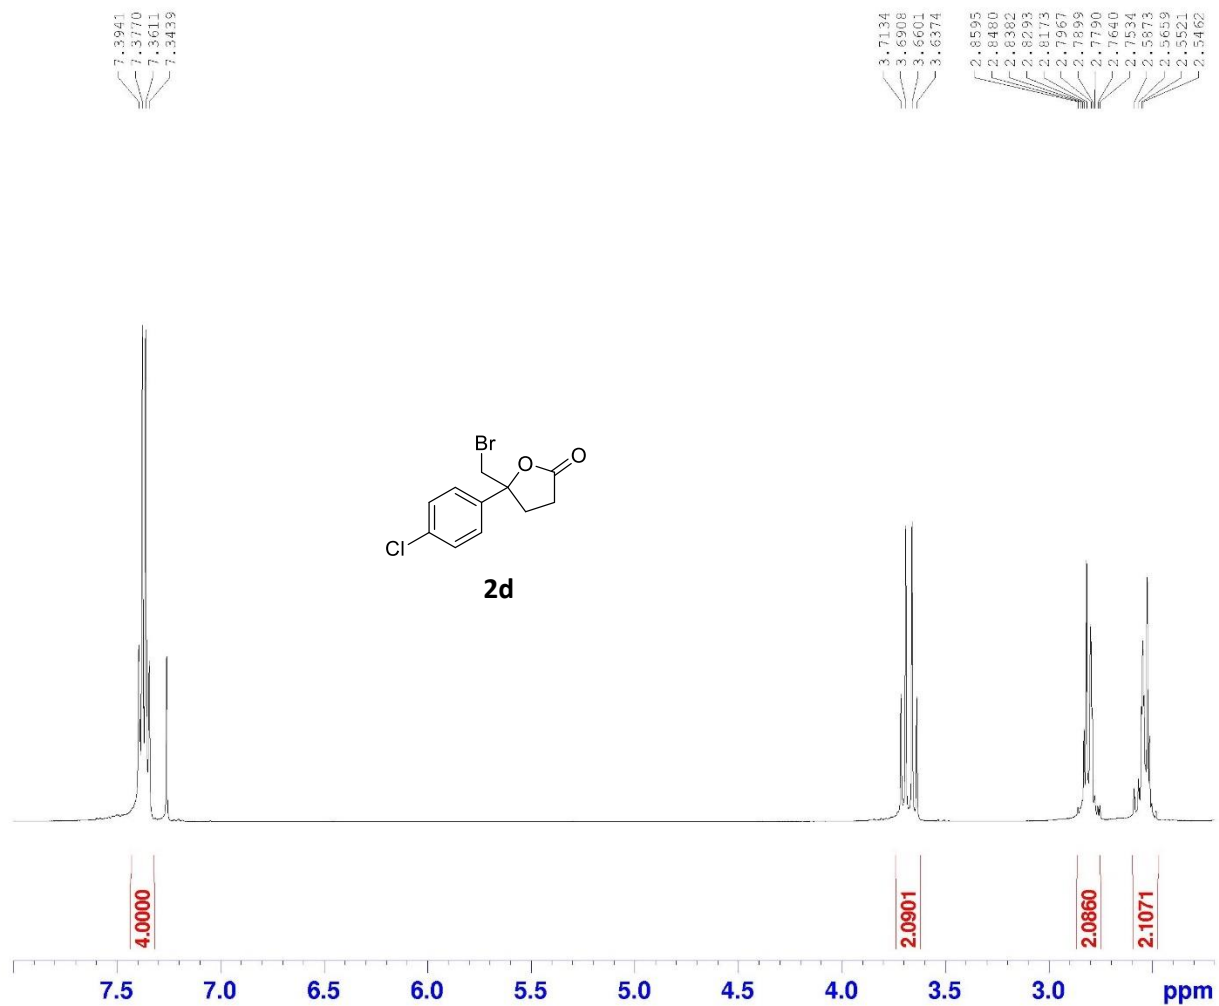

```

Current Data Parameters
NAME      JWC508 data 11
EXPNO    1
PROCNO   1

F2 - Acquisition Parameters
Date_    20201126
Time     21.34 h
INSTRUM  spect
PROBHD   Z119470_0283
PULPROG  zg30
TD        65536
SOLVENT  CDCl3
NS        16
DS        2
SWH       10000.000 Hz
FIDRES    0.305176 Hz
AQ         3.2767999 sec
RG         117.01
DW         50.000 usec
DE         6.50 usec
TE         295.1 K
D1         1.00000000 sec
TDO        1
SFO1      500.1330683 MHz
NUC1       1H
P1         10.91 usec
PLW1      25.00000000 W

F2 - Processing parameters
SI         65536
SF         500.1300128 MHz
WDW        EM
SSB        0
LB         0.30 Hz
GB         0
PC         1.00

```



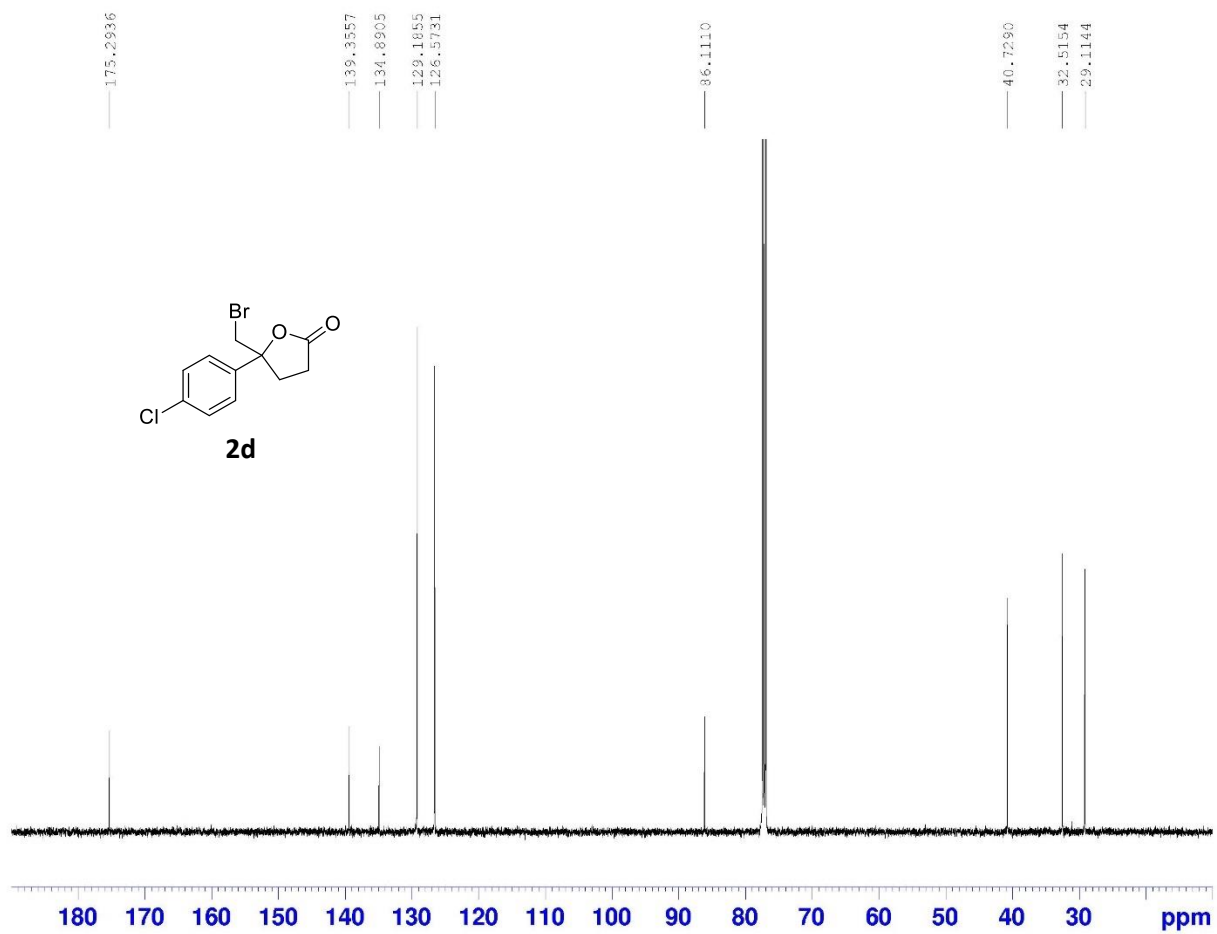

```

Current Data Parameters
NAME      JWC608 data 11
EXPNO    2
PROCNO   1

F2 - Acquisition Parameters
Data_    20201126
Time_    22.17 h
INSTRUM  spect
PROBHD   5119470_0283
PULPROG  zgpg30
TD        65536
SOLVENT  CDCl3
NS        800
DS        4
SWH       23761.904 Hz
FIDRES    0.308261 Hz
AQ        1.1010048 sec
RG        206.72
DE        16.800 usec
TE        295.2 K
D1        2.0000000 sec
D11       0.0300000 sec
TD0       1
SFO1      125.7703643 MHz
NUC1      13C
P1        9.75 usec
PLW1      94.0000000 W
SFO2      500.1320005 MHz
NUC2      1H
CFDPRG[2] waltz16
PCPD2     80.00 usec
PLW2      25.0000000 W
PLW12     0.46495000 W
PLW13     0.23387000 W

F2 - Processing parameters
SI        32768
SF        125.7577744 MHz
AQW       0
SSE       0
LA        1.00 Hz
GB        0
PC        1.40

```

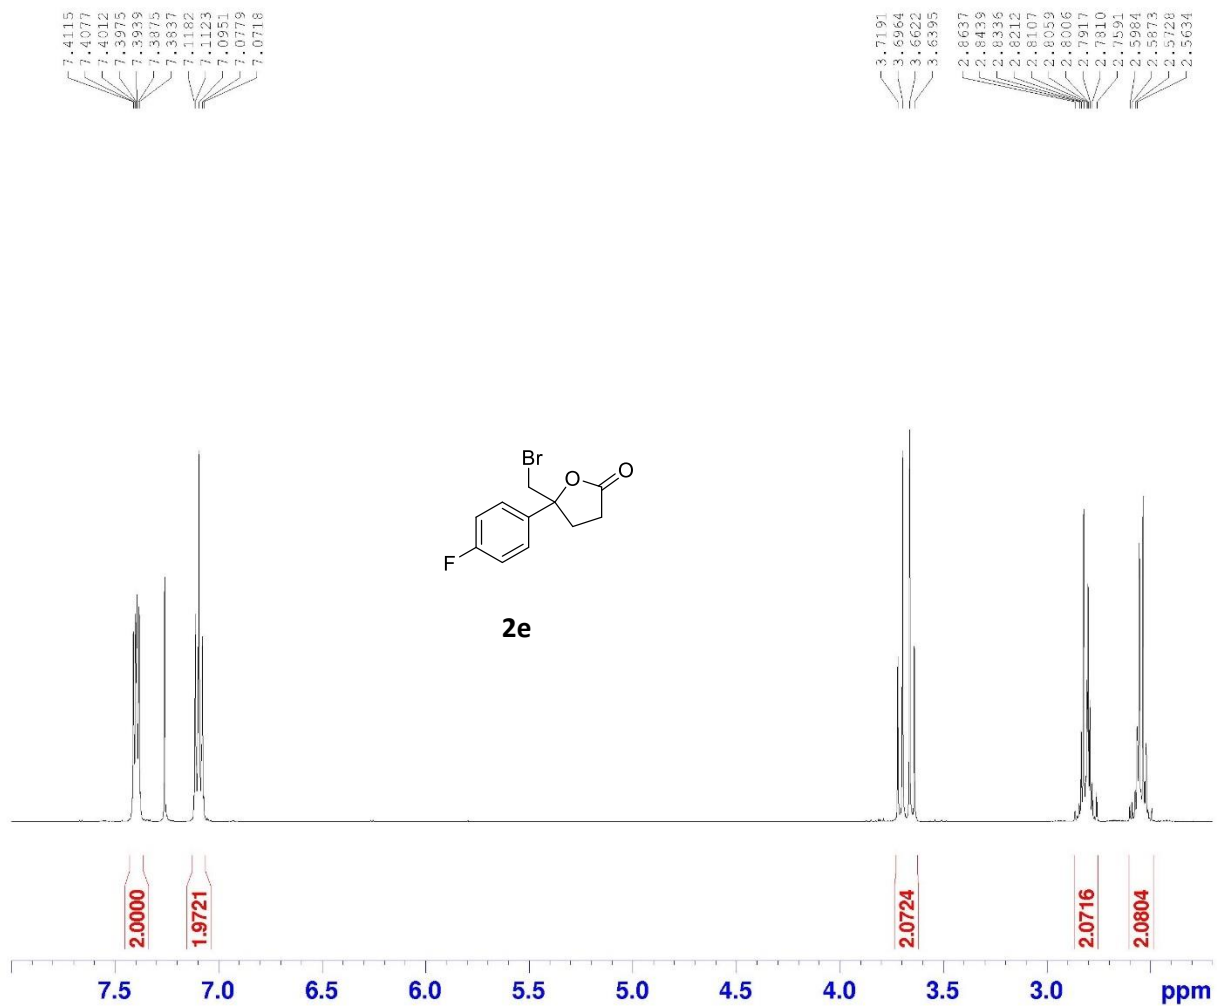

```

Current Data Parameters
NAME      JWC609 data 11
EXPNO    1
PROCNO    1

F2 - Acquisition Parameters
Date_    20201126
Time     22.21 h
INSTRUM  spect
PROBHD   Z119470_0283
PULPROG  zg30
TD        65536
SOLVENT  CDCl3
NS        16
DS        2
SWH       10000.000 Hz
FIDRES    0.305176 Hz
AQ        3.2767999 sec
RG        126.88
DW        50.000 usec
DE        6.50 usec
TE        295.2 K
D1        1.00000000 sec
TD0       1
SFO1     500.1330683 MHz
NUC1      1H
P1        10.91 usec
PLW1     25.00000000 W

F2 - Processing parameters
SI        65536
SF        500.1300125 MHz
WDW       EM
SSB       0
LB        0.30 Hz
GB        0
PC        1.00

```

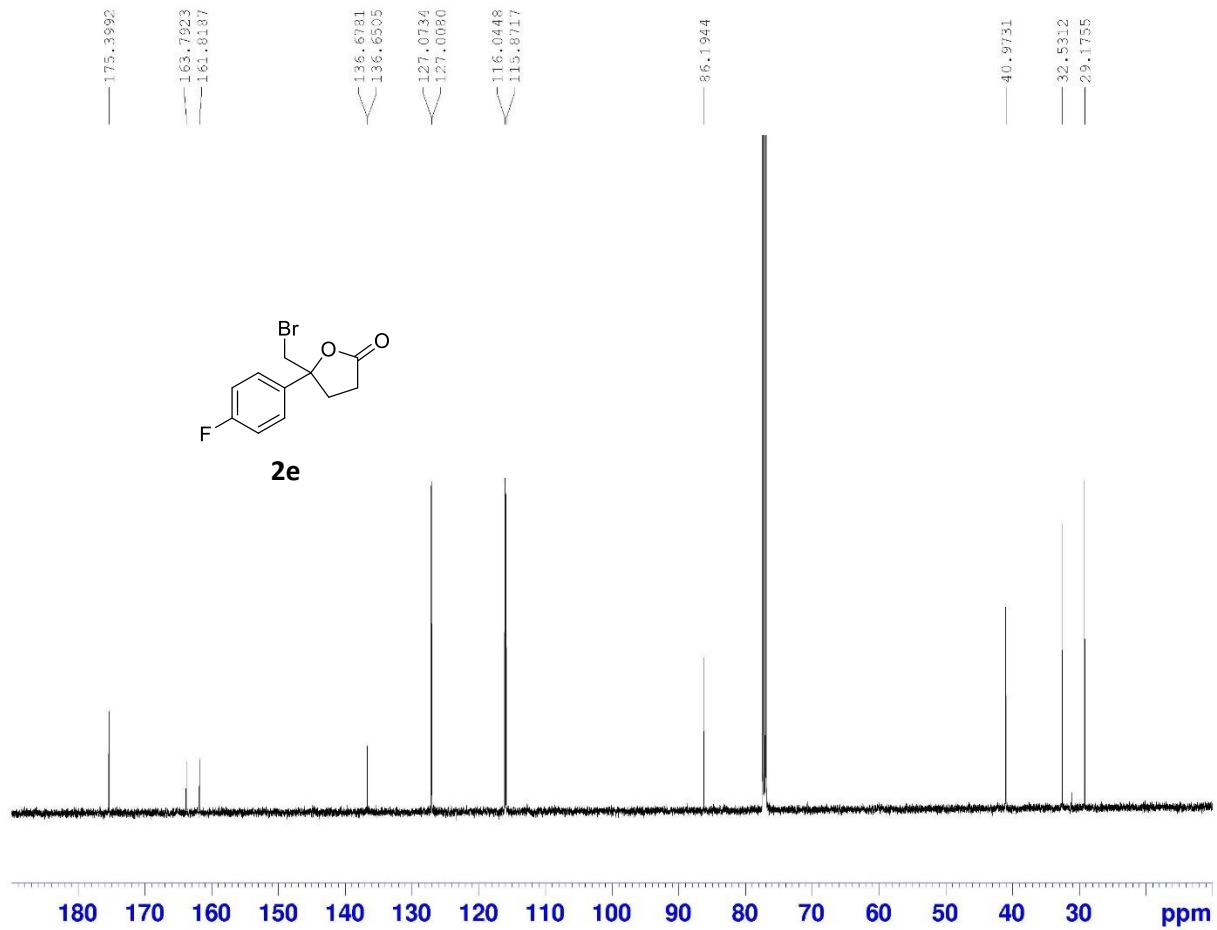

```

Current Data Parameters
NAME      JWC609 data 11
EXPNO    2
PROCNO    1

F2 - Acquisition Parameters
Data_    20201126
Time     23.04 h
INSTRUM  spect
PROBHD   Z119470_0283
PULPROG  zgpg30
TD        65536
SOLVENT  CDCl3
NS        800
DS        4
SWH       23761.904 Hz
FIDRES    0.308261 Hz
AQ        1.1010048 sec
RG        206.72
DW        16.800 usec
DE        6.50 usec
TE        295.2 K
D1        2.0000000 sec
D11       0.0300000 sec
TD0       1
SFO1      125.7703643 MHz
NUC1      13C
P1        9.75 usec
PLW1      94.0000000 W
SFO2      500.1320005 MHz
NUC2      1H
CFDPRG[2] waltz16
PCPD2     80.00 usec
PLW2      25.0000000 W
PLW12     0.46495000 W
PLW13     0.23387000 W

F2 - Processing parameters
SI        32768
SF        125.7577740 MHz
AQW       BM
SSE       0
LA        1.00 Hz
GB        0
PC        1.40

```

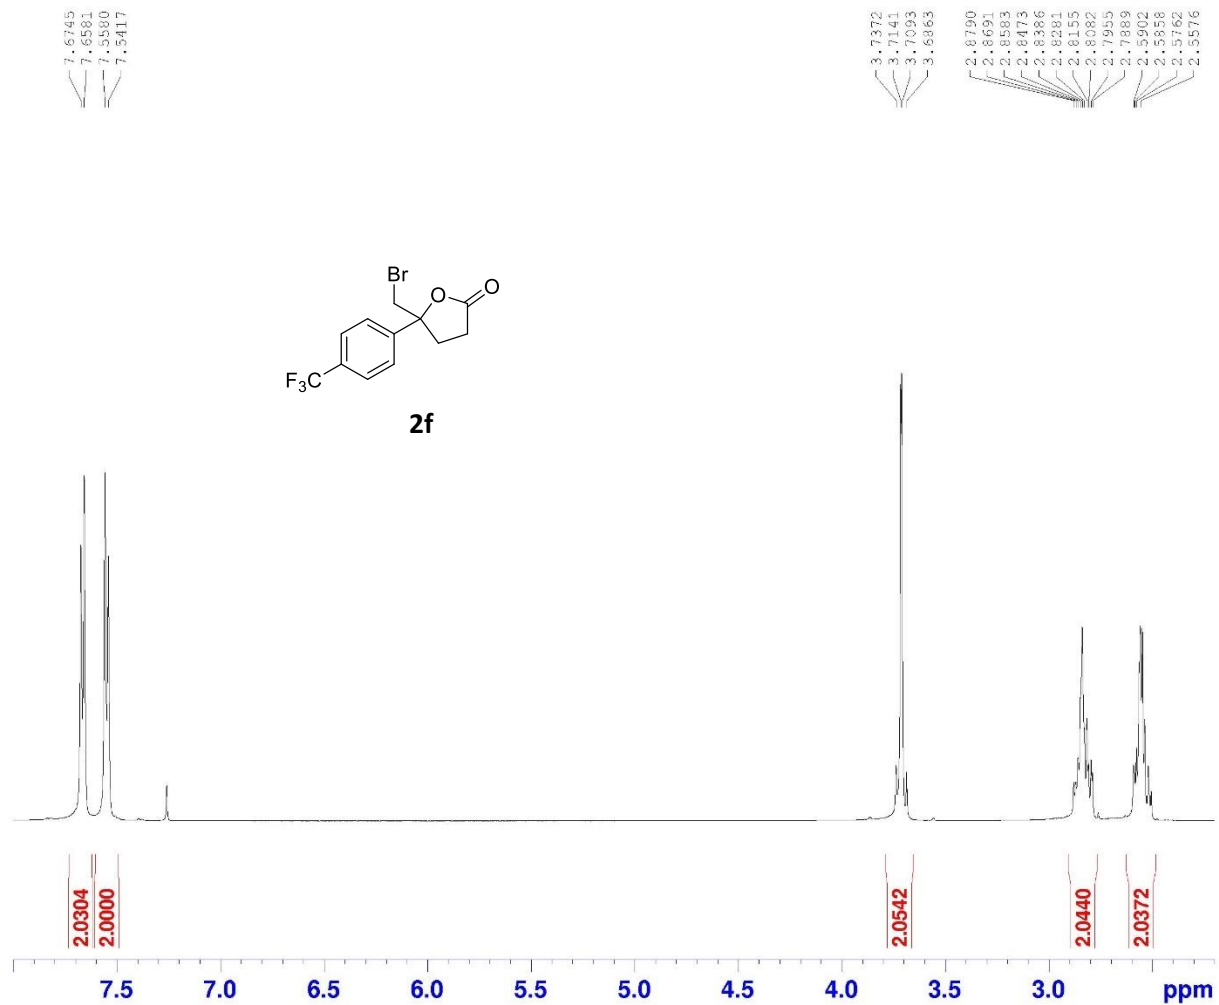

Current Data Parameters  
NAME JWC472 data  
EXPNO 2  
PROCNO 1

F2 - Acquisition Parameters  
Date\_ 20201116  
Time 18.27 h  
INSTRUM spect  
PROBHD Z119470\_0283  
PULPROG zg30  
TD 65536  
SOLVENT CDCl3  
NS 16  
DS 2  
SWH 10000.000 Hz  
FIDRES 0.305176 Hz  
AQ 3.2767999 sec  
RG 30.85  
DW 50.000 usec  
DE 6.50 usec  
TE 295.2 K  
D1 1.00000000 sec  
TDO 1  
SFO1 500.1330683 MHz  
NUC1 1H  
P1 10.91 usec  
PLW1 25.00000000 W

F2 - Processing parameters  
SZ 65536  
SF 500.1300128 MHz  
WDW EM  
SSB 0  
LB 0.30 Hz  
GB 0  
PC 1.00

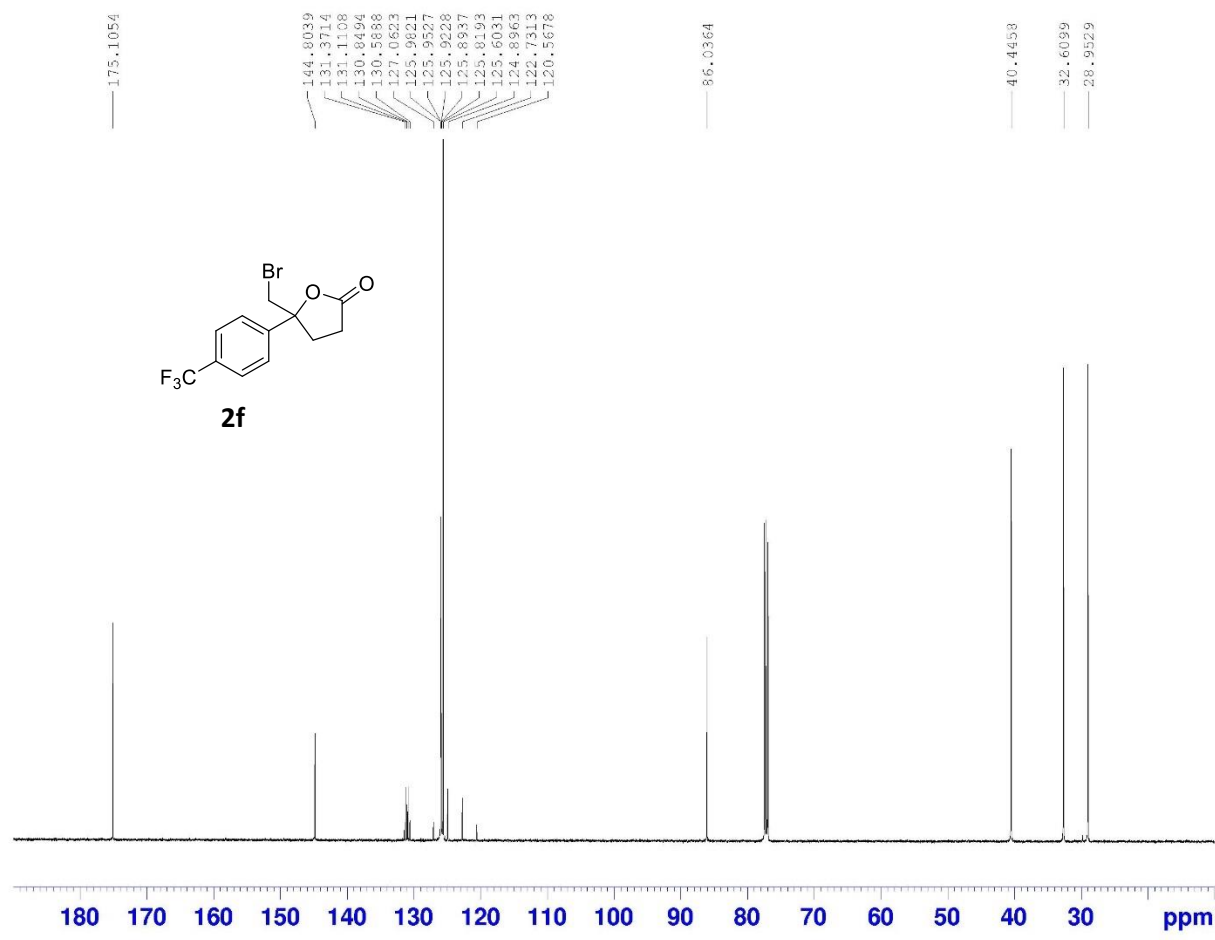

```

Current Data Parameters
NAME      JWC472 data
EXPNO     3
PROCNO    1

F2 - Acquisition Parameters
Data_     20201116
Time      21.50 h
INSTRUM   spect
PROBHD    Z119470_0283
PULPROG   zgpg30
TD         55336
SOLVENT   CDC13
NS         700
DS         4
SWH        23751.904 Hz
FIDRES     0.308261 Hz
AQ         1.1010048 sec
RG         205.72
DW         16.800 usec
DE         6.50 usec
TK         295.2 K
D1         2.0000000 sec
D11        0.0300000 sec
TD0        1
SFO1       125.7703643 MHz
NUC1        13C
P1          9.75 usec
PLW1        94.0000000 W
SFO2        500.1320005 MHz
NUC2         1H
CPDPRG[2]  waltz16
PCPD2       80.00 usec
PLW2        25.0000000 W
PLW12       0.4649500 W
ELW13       0.2338700 W

F2 - Processing parameters
SI          32768
SF          125.7577808 MHz
AQW         BM
SSE         0
LA          1.00 Hz
GB          0
PC          1.40

```

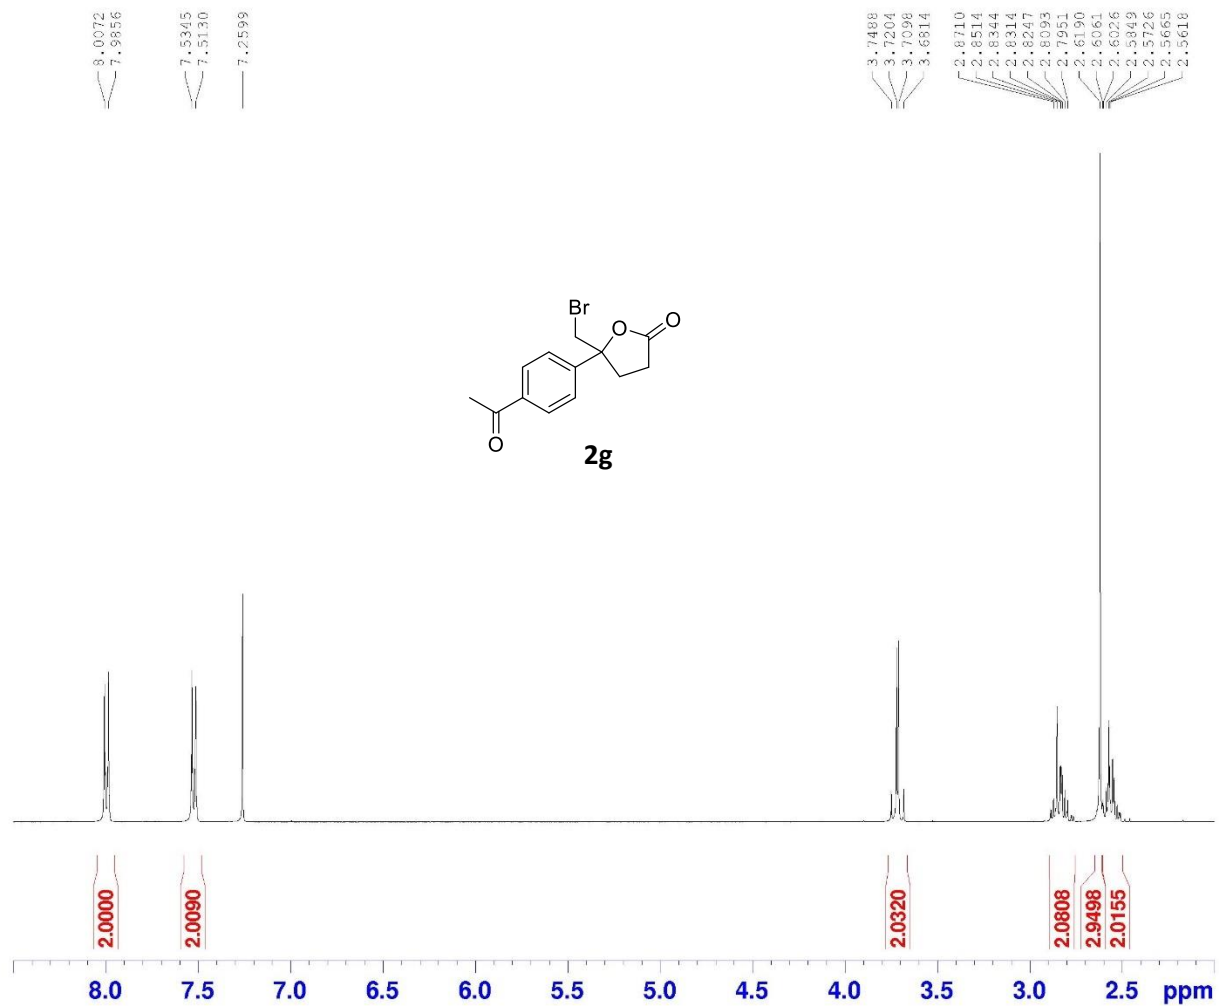

Current Data Parameters  
NAME JWC47311 p  
EXPNO 1  
PROCNO 1

F2 - Acquisition Parameters  
Date\_ 20200221  
Time 14.54 h  
INSTRUM spect  
PROBHD 5820201\_0170  
PULPROG zg30  
TD 65536  
SOLVENT CDCl3  
NS 16  
DS 2  
SWH 8012.820 Hz  
FIDRES 0.244832 Hz  
AQ 4.0894465 sec  
RG 203  
DW 62.400 usec  
DE 6.50 usec  
TE 293.2 K  
D1 1.00000000 sec  
TDO 1  
SFO1 400.1324708 MHz  
NUC1 1H  
P1 6.75 usec  
PLW1 13.17700005 W

F2 - Processing parameters  
SZ 65536  
SF 400.1300097 MHz  
WDW EM  
SSB 0  
LB 0.30 Hz  
GB 0  
PC 1.00

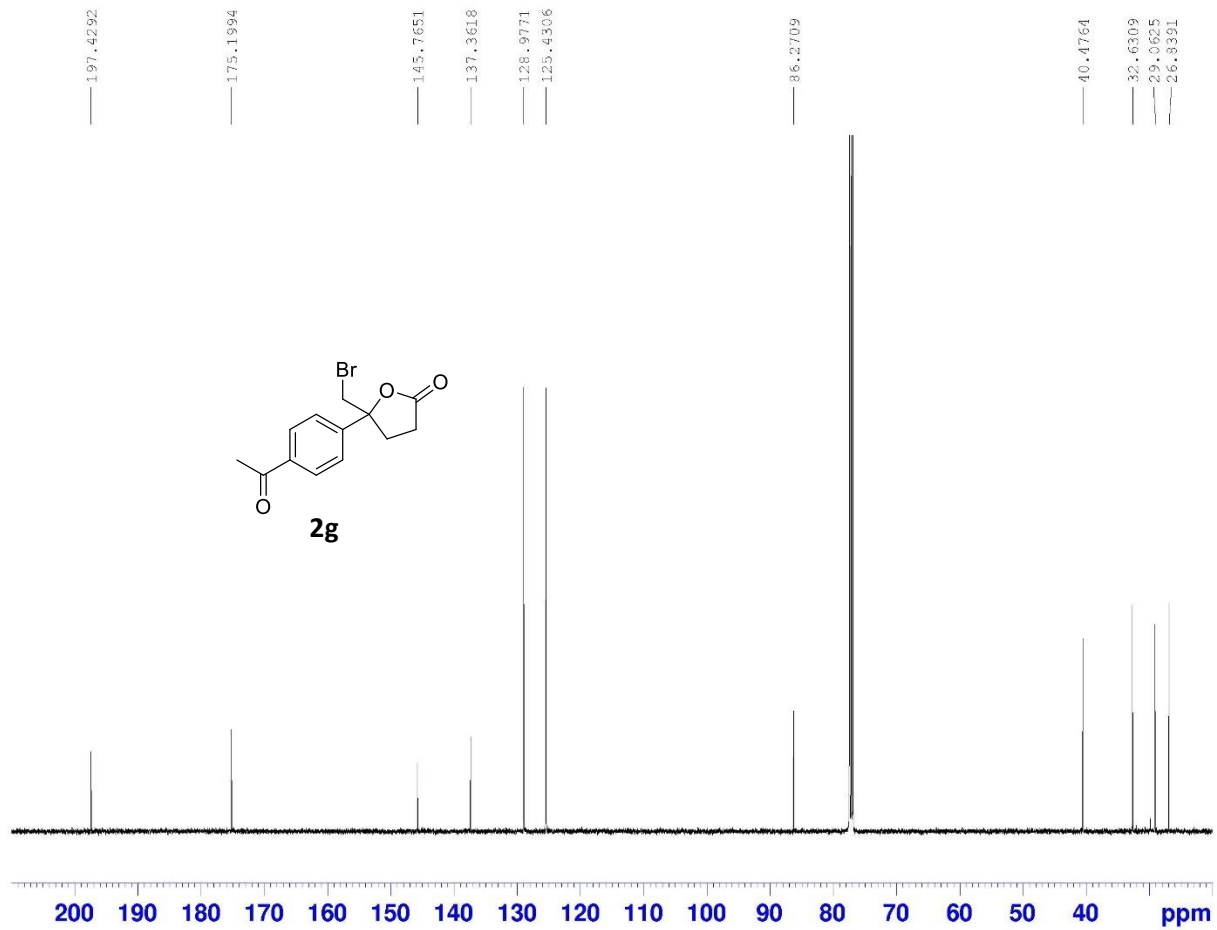

```

Current Data Parameters
NAME      JWC473 data
EXPNO    2
PROCNO   1

F2 - Acquisition Parameters
Data_    20201113
Time_    0.34 h
INSTRUM  spect
PROBHD   Z119470_0283
PULPROG  zgpg30
TD       55536
SOLVENT  cdcl3
NS       1024
DS       4
SWH      23751.904 Hz
FIDRES   0.308261 Hz
AQ       1.1010048 sec
RG       205.72
DW       16.800 usec
DE       6.50 usec
TE       295.2 K
D1       2.0000000 sec
D11      0.0300000 sec
TD0      1
SFO1     125.7703643 MHz
NUC1     13C
P1       9.75 usec
PLW1     94.0000000 W
SFO2     500.1320005 MHz
NUC2     1H
CPDPRG[2] waltz16
PCPD2    80.00 usec
PLW2     25.0000000 W
PLW12    0.46495000 W
PLW13    0.23387000 W

F2 - Processing parameters
SI       32768
SF       125.7577743 MHz
AQW      BM
SSE      0
LA       1.00 Hz
GB       0
PC       1.40

```

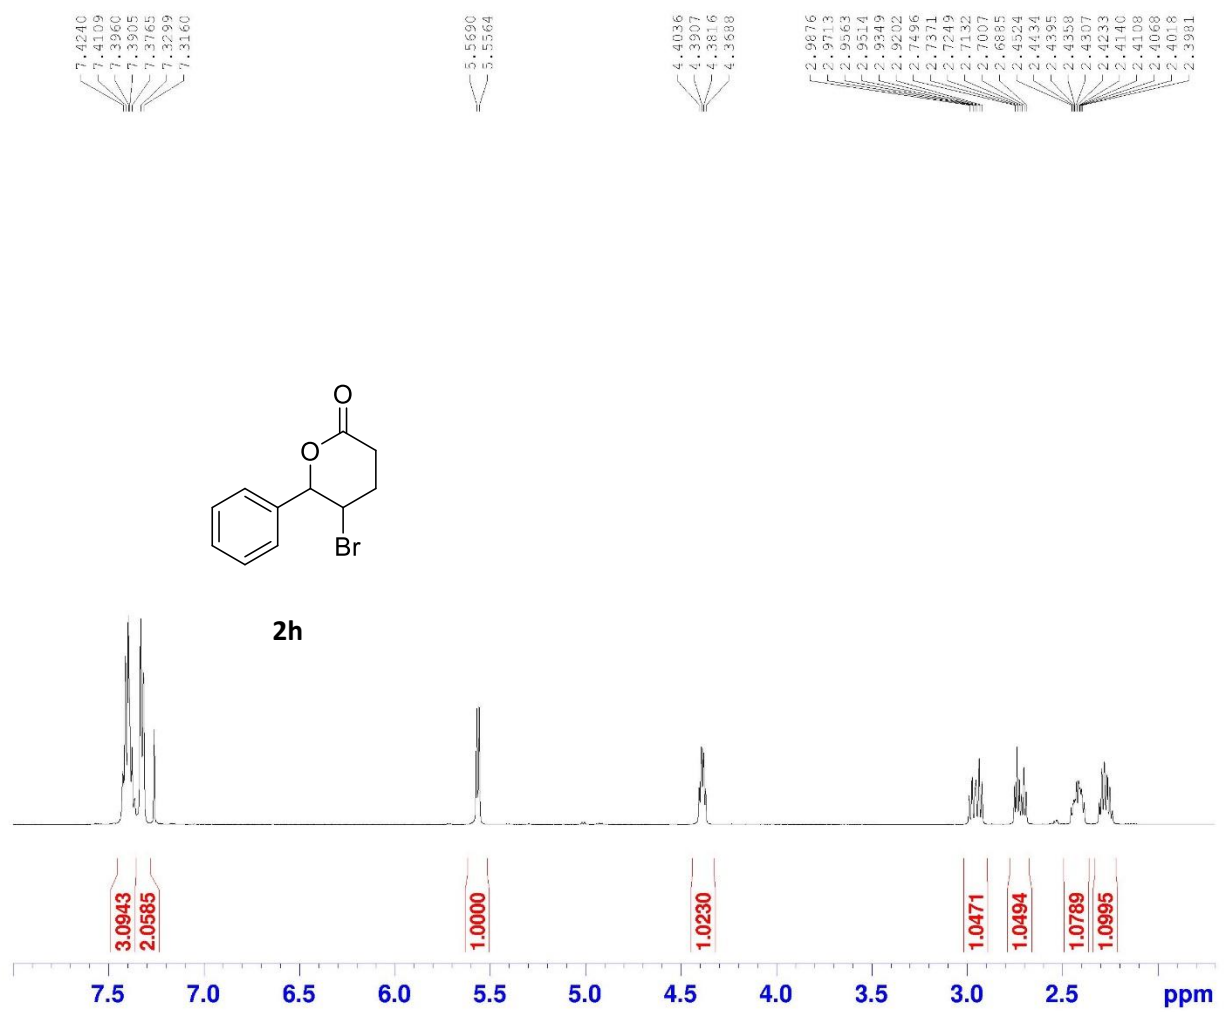

```

Current Data Parameters
NAME      JWC534 data
EXPNO    1
PROCNO   1

F2 - Acquisition Parameters
Date_    20210113
Time     20.34 h
INSTRUM  spect
PROBHD   Z119470_0283 (
PULPROG  zg30
TD       65536
SOLVENT  CDCl3
NS       16
DS       2
SWH      10000.000 Hz
FIDRES   0.305176 Hz
AQ       3.2767999 sec
RG       93.28
DW       50.000 usec
DE       6.50 usec
TE       295.2 K
D1       1.00000000 sec
TDO      1
SFO1     500.1330883 MHz
NUC1     1H
P1       10.91 usec
PL1      25.00000000 W

F2 - Processing parameters
SC       65536
SF       500.1300125 MHz
WDW      EM
SSB      0
LA       0.30 Hz
GB       0
PC       1.00
  
```



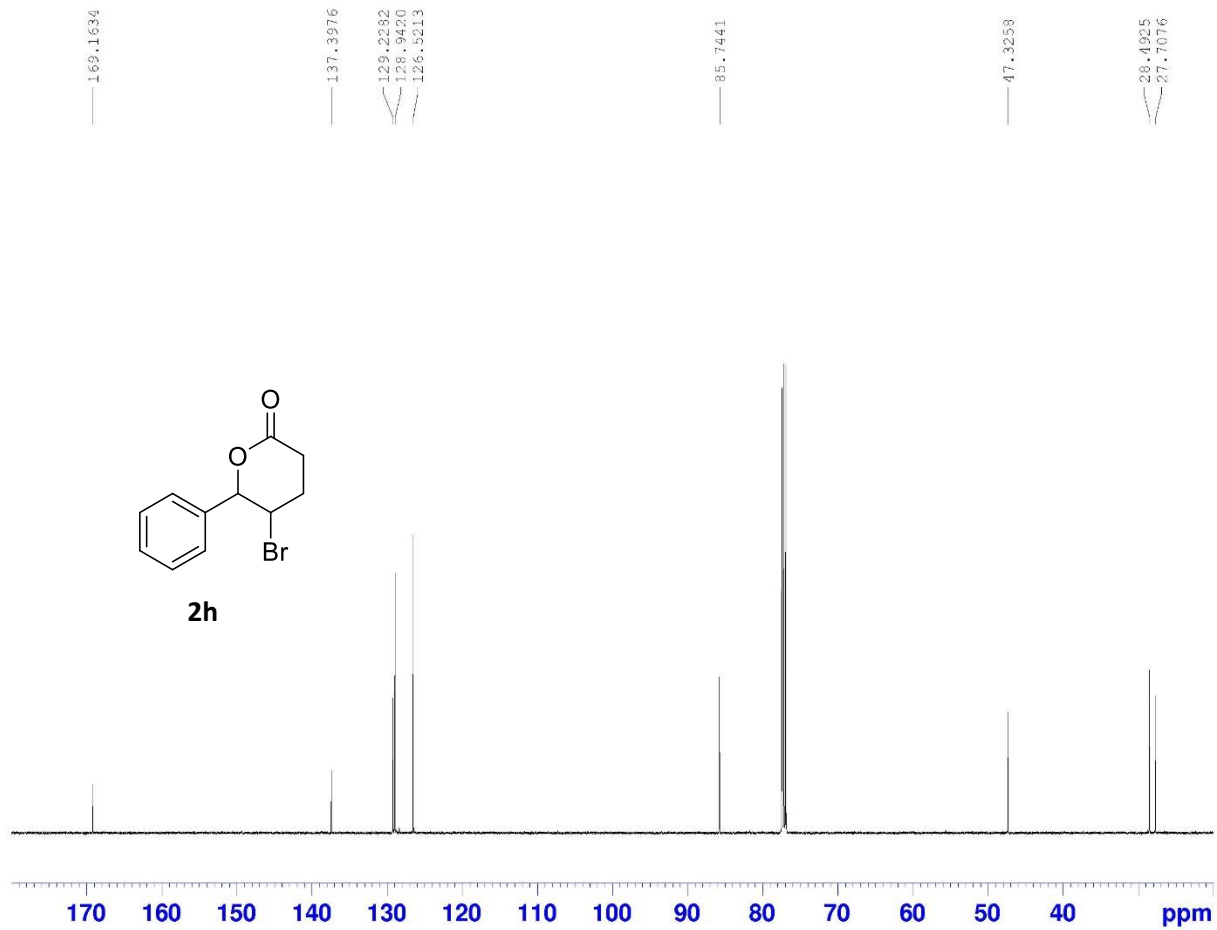

```

Current Data Parameters
NAME          JWC534 data
EXPNO        2
PROCNO       1

F2 - Acquisition Parameters
Date_        20210113
Time         21.29 h
INSTRUM      spect
PROBHD       Z119470_0283
PULPROG      zgpg30
TD           52536
SOLVENT      cdcl3
NS           1024
DS           4
SWH          29751.904 Hz
FIDRES       0.308261 Hz
AQ           1.1010048 sec
RG           142.5
DW           16.800 usec
DE           6.50 usec
TE           295.2 K
D1           2.0000000 sec
D11          0.0300000 sec
TD0          1
SFO1         125.7703643 MHz
NUC1         13C
P1           9.75 usec
PLW1         94.0000000 W
SFO2         500.1320005 MHz
NUC2         1H
CPDPRG[2]    waltz16
PCPD2        80.00 usec
PLW2         25.0000000 W
PLW12        0.46495000 W
ELW13        0.23387000 W

F2 - Processing parameters
SI           32768
SF           125.7577753 MHz
AQW          BM
SSE          0
LA           1.00 Hz
GB           0
PC           1.40

```

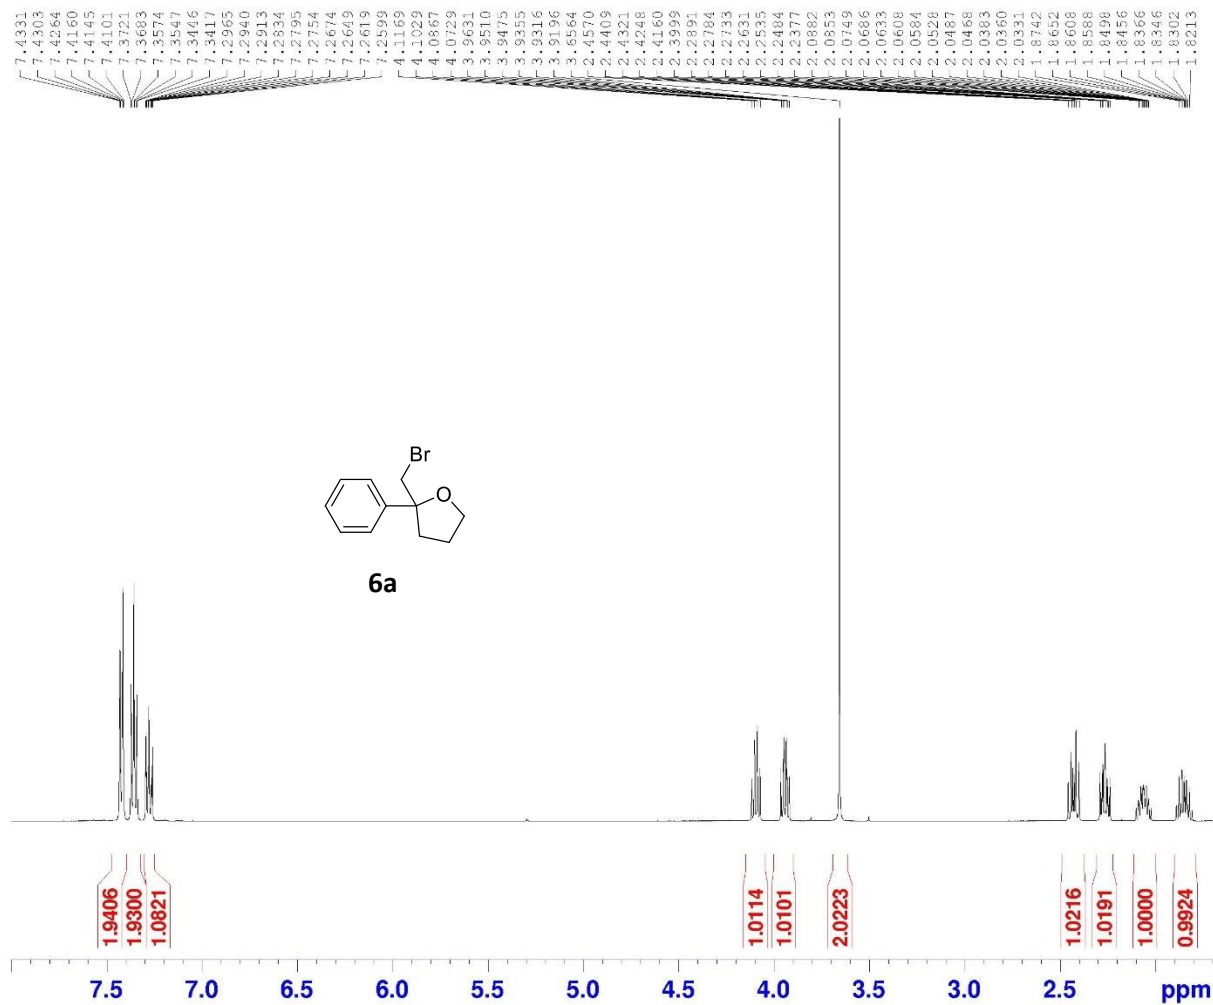

Current Data Parameters  
 NAME JWC514 data  
 EXPNO 1  
 PROCNO 1

F2 - Acquisition Parameters  
 Date\_ 20201208  
 Time 18.34 h  
 INSTRUM spect  
 PROBHD Z119470\_0283 |  
 PULPROG zg30  
 TD 65536  
 TB  
 SOLVENT CDCl3  
 NS 16  
 DS 2  
 SWH 10000.000 Hz  
 FIDRES 0.305176 Hz  
 AQ 3.2767999 sec  
 RG 63.76  
 DW 50.000 usec  
 DE 6.50 usec  
 TE 295.1 K  
 D1 1.00000000 sec  
 TD0 1  
 SPOL 500.1330683 MHz  
 NUC1 1H  
 P1 10.91 usec  
 PLW1 25.00000000 W

F2 - Processing parameters  
 SZ 65536  
 SF 500.1300122 MHz  
 WDW EM  
 SSB 0  
 LB 0.30 Hz  
 GB 0  
 PC 1.00

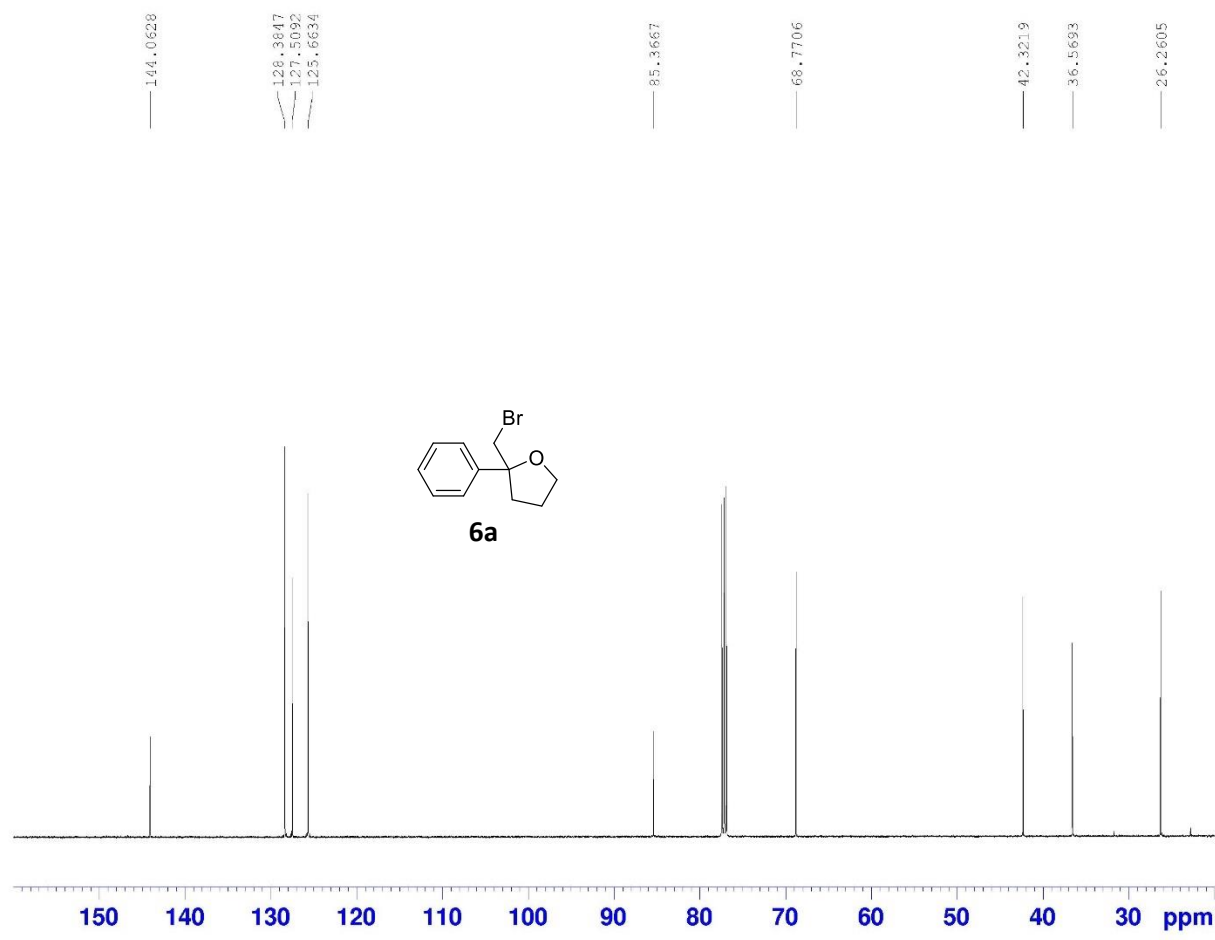

```

Current Data Parameters
NAME      JWC514 data
EXPNO    2
PROCNO    1

F2 - Acquisition Parameters
Date_     20201208
Time      21.27 h
INSTRUM   spect
PROBHD    W119470_0283
PULPROG   zgpg30
TD         65536
SOLVENT   cdcl3
NS         1024
DS         4
SWH        23761.904 Hz
FIDRES     0.308261 Hz
AQ         1.1010048 sec
RG         206.72
DW         16.800 usec
DE         6.50 usec
TE         295.1 K
D1         2.0000000 sec
D11        0.0300000 sec
TD0        1
SFO1       125.7703643 MHz
NUC1       13C
P1         9.75 usec
PLW1       94.0000000 W
SFO2       500.1320005 MHz
NUC2       1H
CFDPRG[2]  waltz16
PCPD2      80.00 usec
PLW2       25.0000000 W
PLW12      0.46495000 W
PLW13      0.23387000 W

F2 - Processing parameters
SI         32768
SF         125.7577772 MHz
NUW        BM
SSE        0
LA         1.00 Hz
GB         0
PC         1.40

```

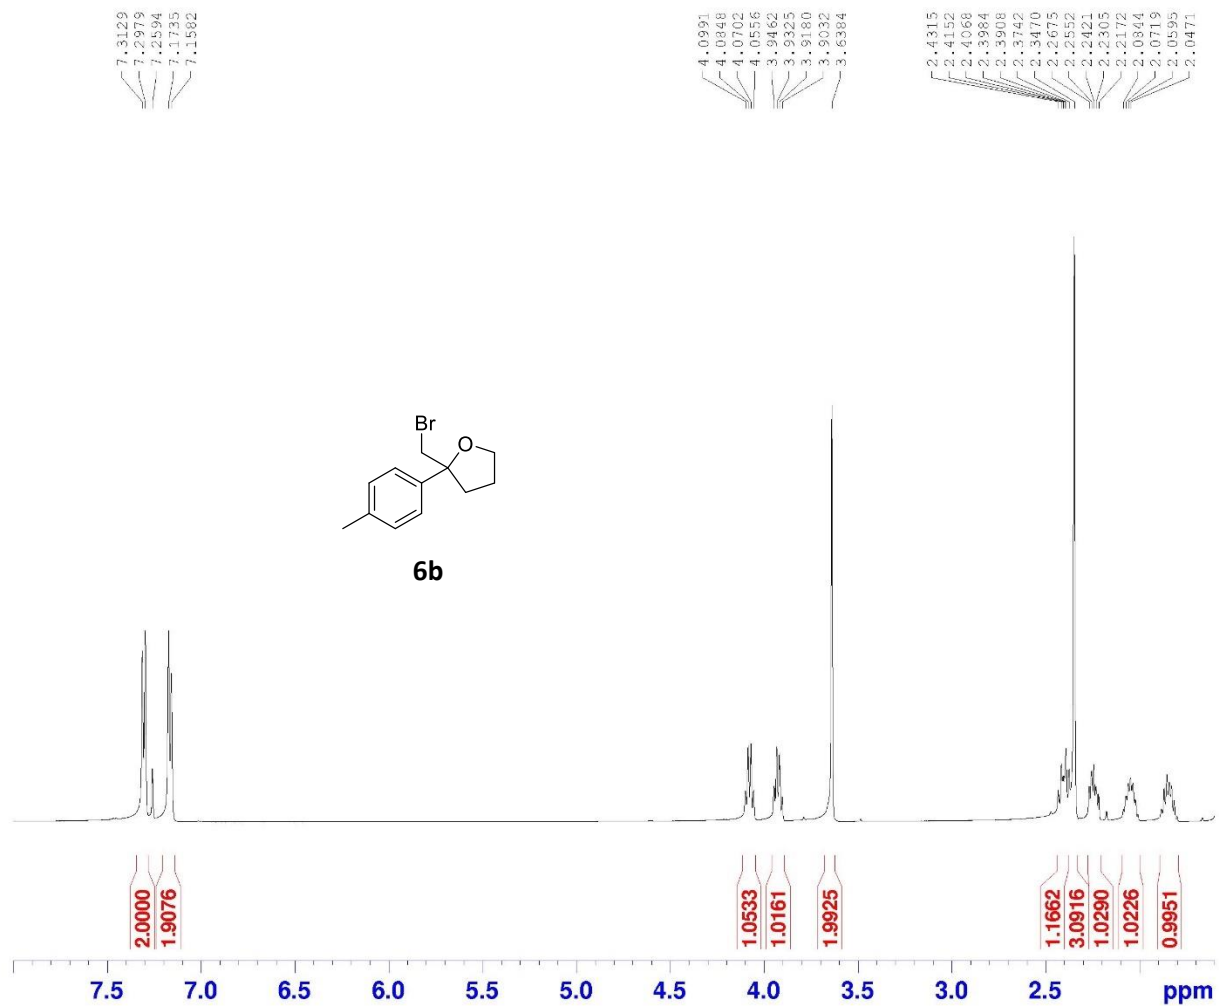

```

Current Data Parameters
NAME          JWC523 data
EXPNO        2
PROCNO       1

F2 - Acquisition Parameters
Date_        20201221
Time         21.50 h
INSTRUM      spect
PROBHD       Z119470_0283
PULPROG      zg30
TD           65536
SOLVENT      CDCl3
NS           16
DS           2
SWH          10000.000 Hz
FIDRES       0.305176 Hz
AQ           3.2767999 sec
RG           93.28
DW           50.000 usec
DE           6.50 usec
TE           295.2 K
D1           1.00000000 sec
TDO          1
SFO1         500.1330683 MHz
NUC1          1H
P1           10.91 usec
PLW1         25.00000000 W

F2 - Processing parameters
SI           65536
SF           500.1300130 MHz
WDW          EM
SSB          0
LB           0.30 Hz
GB           0
PC           1.00
  
```

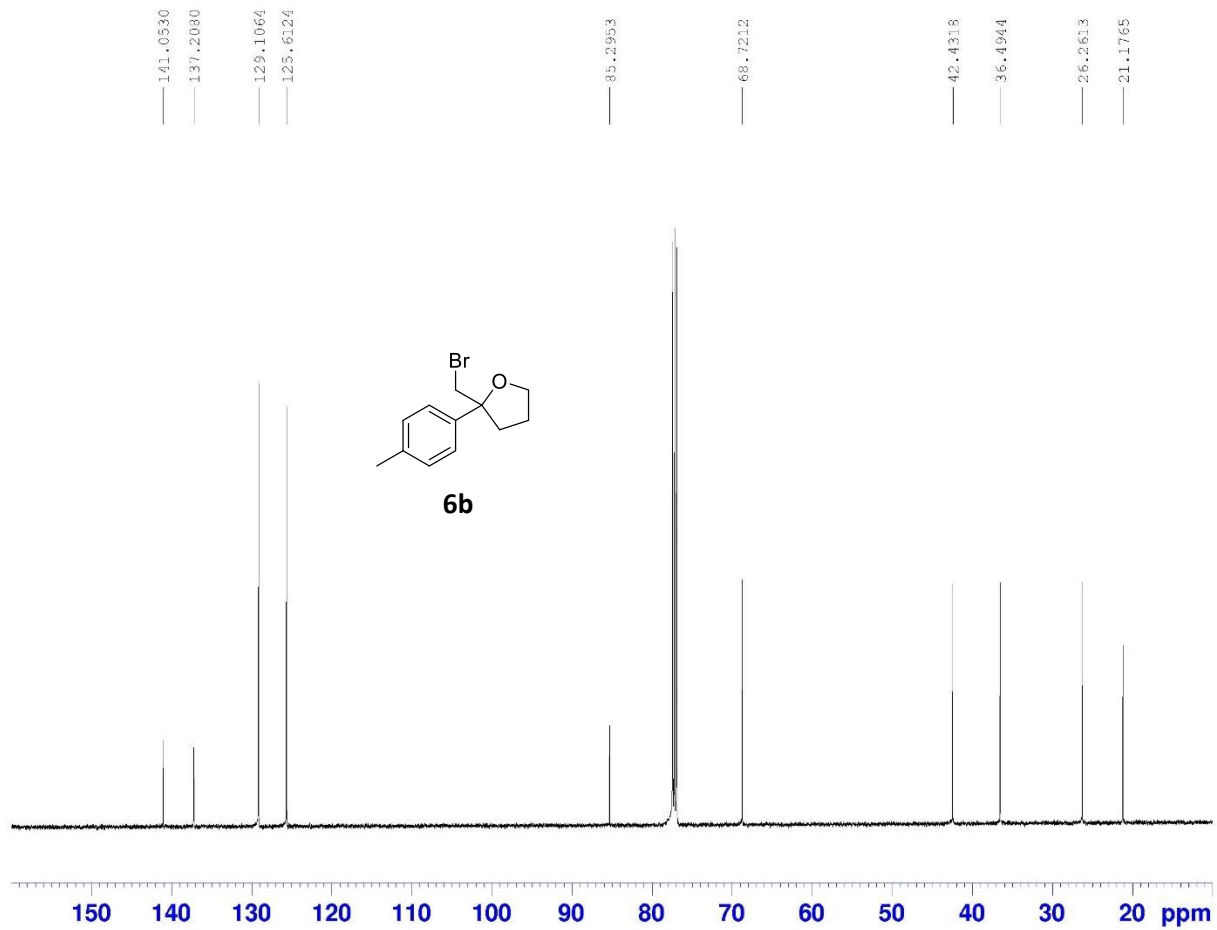

```

Current Data Parameters
NAME          JWC523 data
EXPNO         1
PROCNO        1

F2 - Acquisition Parameters
Data_         20201221
Time_         21.49 h
INSTRUM       spect
PROBHD        M119470_0283
PULPROG       zgpg30
TD            55536
SOLVENT       CDCl3
NS            1024
DS            1
SWH           29761.904 Hz
FIDRES        0.308261 Hz
AQ            1.1010048 sec
RG            206.72
DW            16.800 usec
DE            6.50 usec
TE            295.2 K
D1            2.0000000 sec
D11           0.0300000 sec
TD0           1
SFO1          125.7703643 MHz
NUC1          13C
P1            9.75 usec
PLW1          94.0000000 W
SFO2          500.1320005 MHz
NUC2          1H
CFDPRG[2]    waltz16
PCPD2         80.00 usec
PLW2          25.0000000 W
PLW12         0.46495000 W
ELW13         0.23387000 W

F2 - Processing parameters
SI            32768
SF            125.7577752 MHz
AQW          BM
SSE           0
LA            1.00 Hz
GB            0
PC            1.40

```

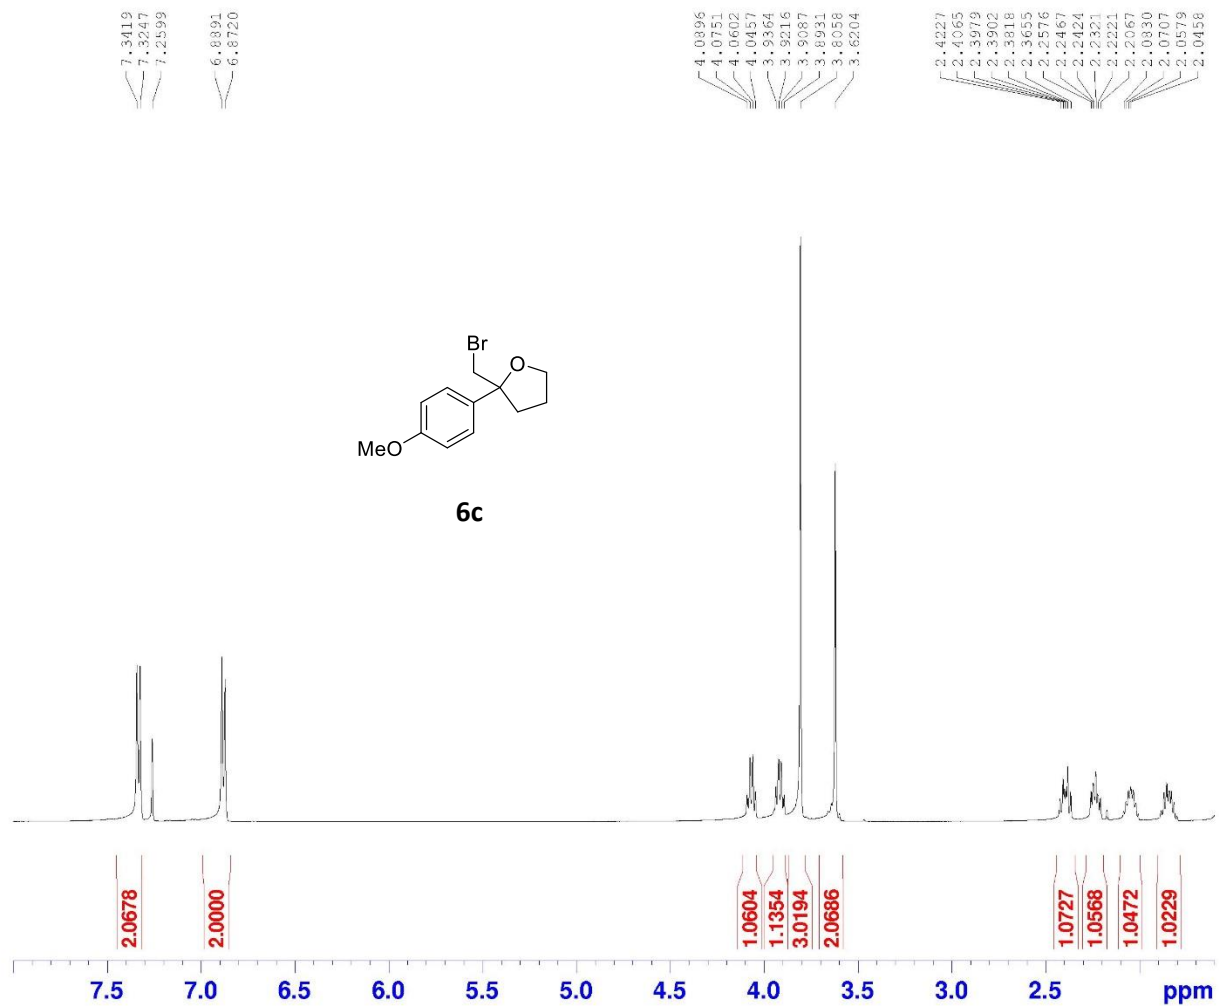

```

Current Data Parameters
NAME          JWC526 data
EXPNO        2
PROCNO       1

F2 - Acquisition Parameters
Date_        20201221
Time         22.28 h
INSTRUM      spect
PROBHD       Z119470_0283
PULPROG      zg30
TD           65536
SOLVENT      CDCl3
NS           16
DS           2
SWH          10000.000 Hz
FIDRES       0.305176 Hz
AQ           3.2767999 sec
RG           117.01
DW           50.000 usec
DE           6.50 usec
TE           295.2 K
D1           1.00000000 sec
TD0          1
SFO1         500.1330683 MHz
NUC1         1H
P1           10.91 usec
PL1          25.00000000 W

F2 - Processing parameters
SI           65536
SF           500.1300127 MHz
WDW          EM
SSB          0
LB           0.30 Hz
GB           0
PC           1.00

```

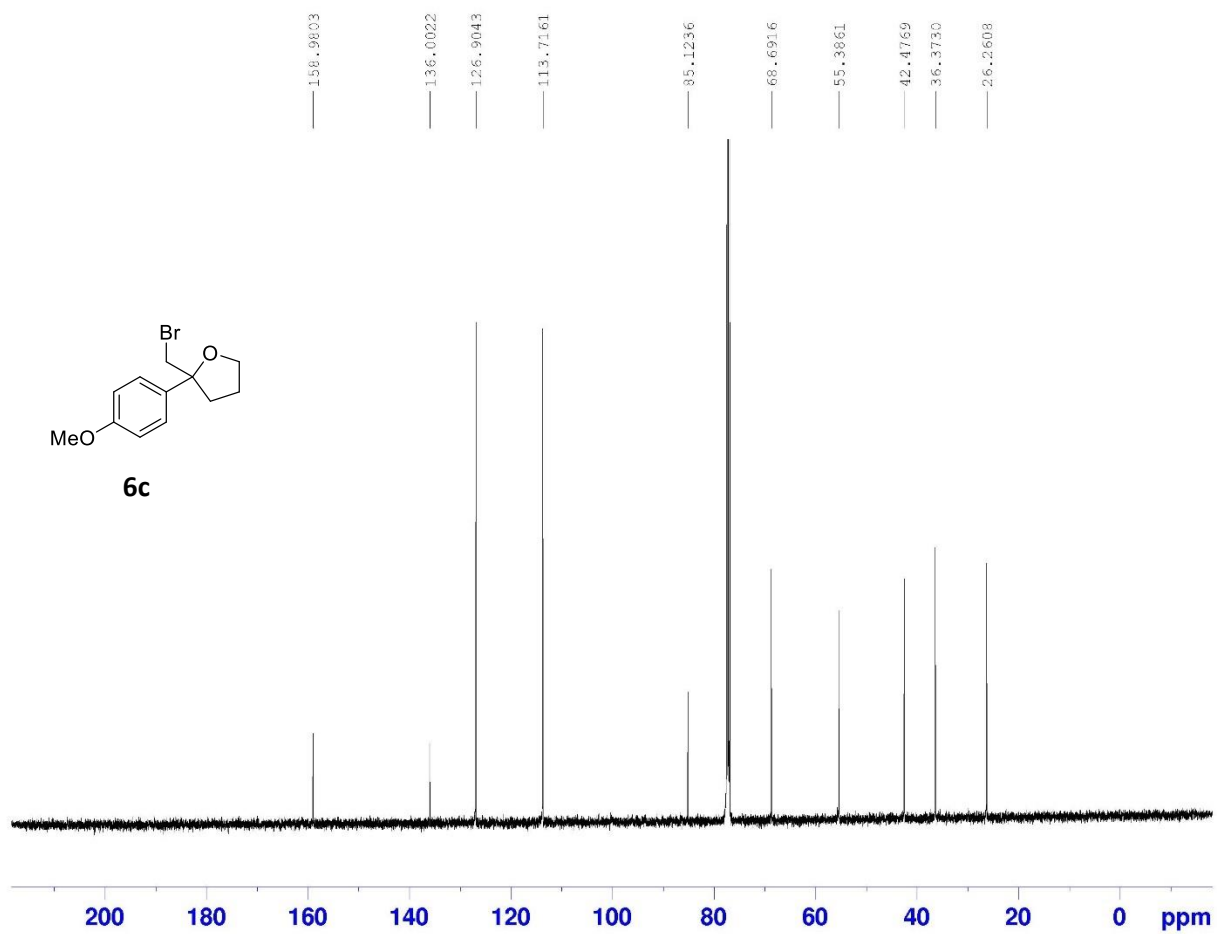

```

Current Data Parameters
NAME          JWC526 data
EXPNO        1
PROCNO       1

F2 - Acquisition Parameters
Data_        20201221
Time_        22.26 h
INSTRUM      spect
PROBHD       W119470_0283
PULPROG      zgpg30
TD           55536
SOLVENT      CDCl3
NS           625
DS           1
SWH          29761.904 Hz
FIDRES       0.908261 Hz
AQ           1.1010048 sec
RG           206.72
DW           16.800 usec
DE           6.50 usec
TE           295.1 K
D1           2.0000000 sec
D11          0.0300000 sec
TD0          1
SFO1         125.7703643 MHz
NUC1         13C
P1           9.75 usec
PLW1         94.0000000 W
SFO2         500.1320005 MHz
NUC2         1H
CFDPRG[2]   waltz16
PCPD2       80.00 usec
PLW2         25.0000000 W
PLW12        0.46495000 W
PLW13        0.23387000 W

F2 - Processing parameters
SI           32768
SF           125.7577743 MHz
AQW          BM
SSE          0
LA           1.00 Hz
GB           0
PC           1.40

```

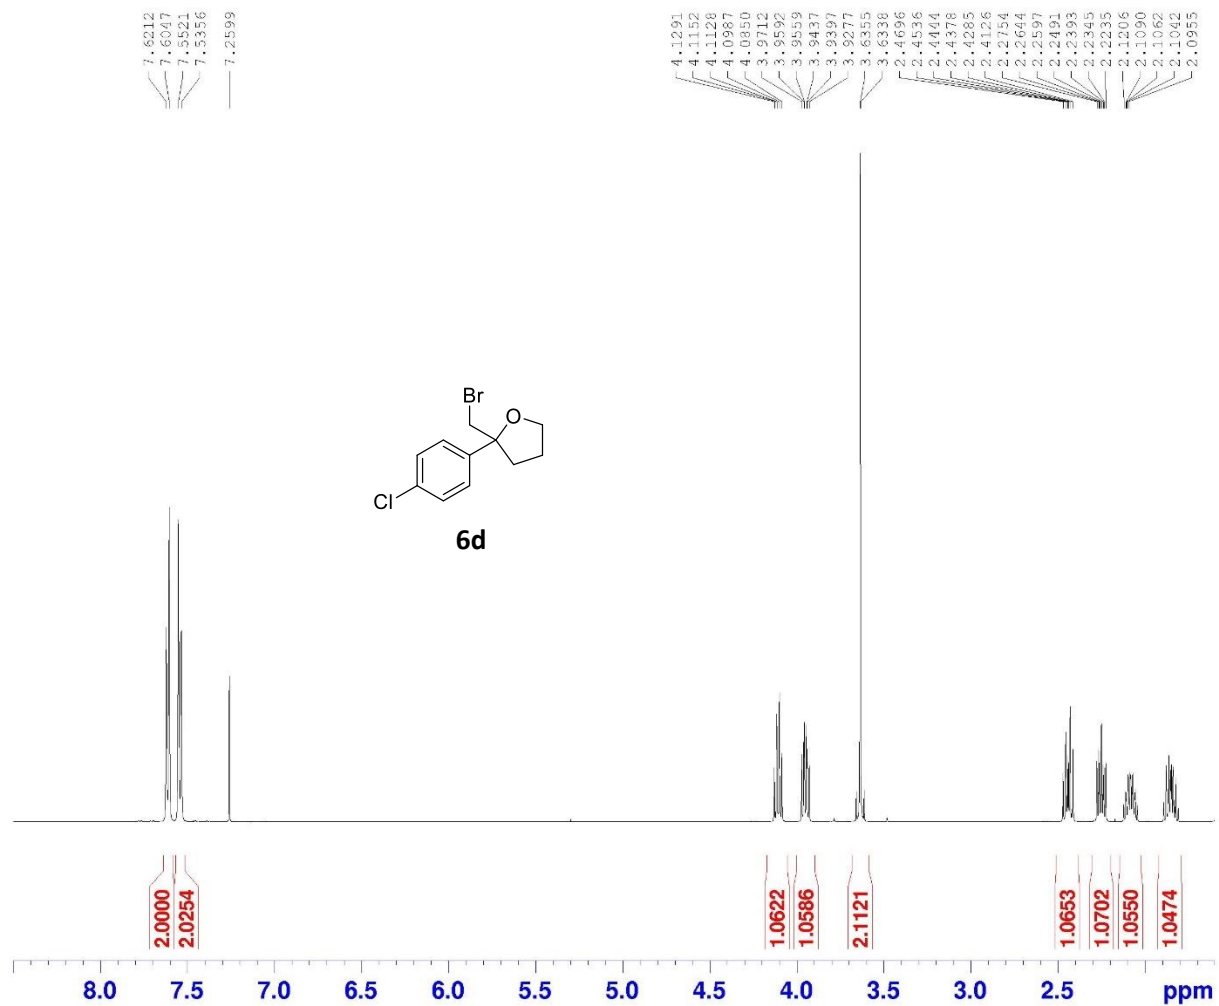



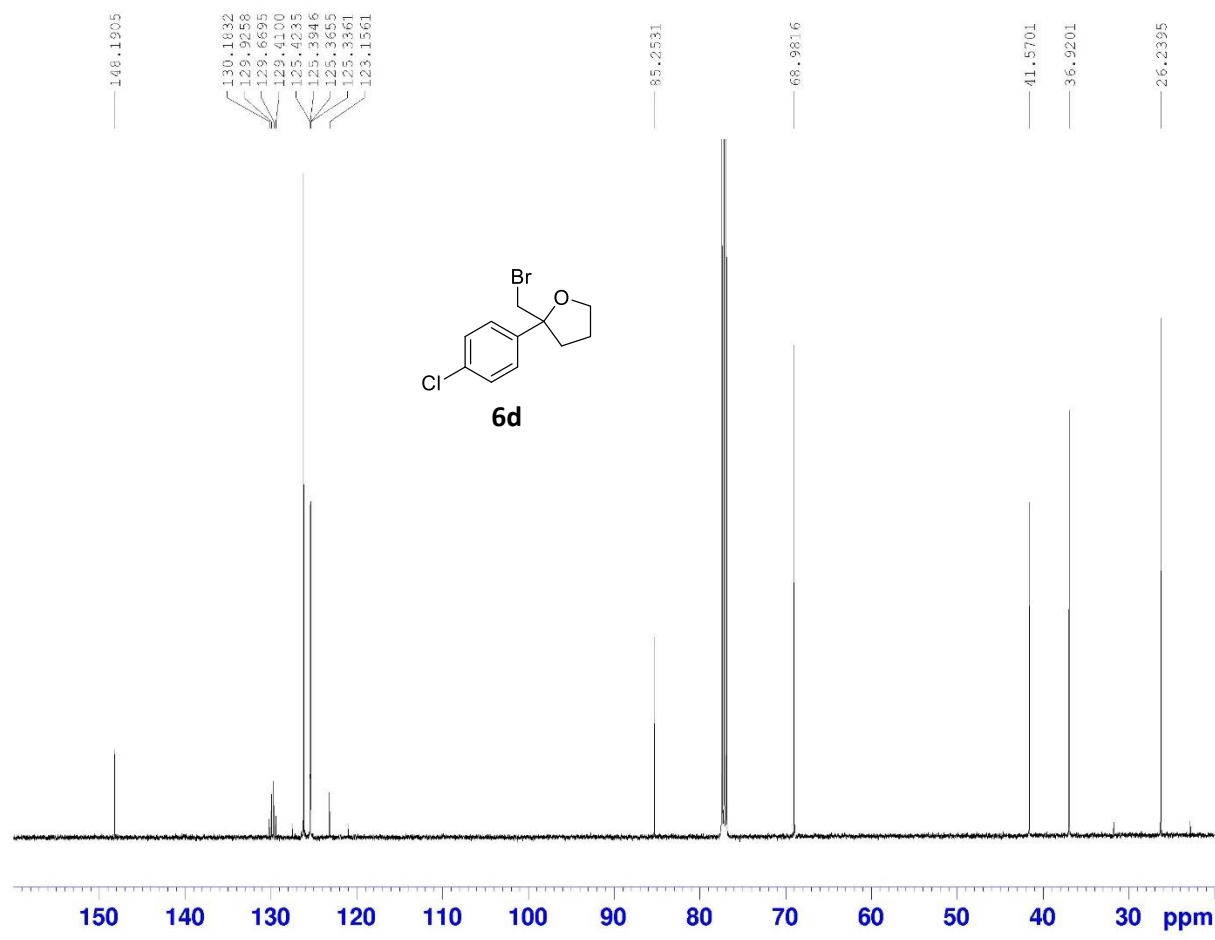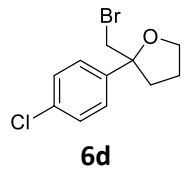

```

Current Data Parameters
NAME          JWC519 data
EXPNO        2
PROCNO       1

F2 - Acquisition Parameters
Data_        20201208
Time_        22.23 h
INSTRUM      spect
PROBHD       5119470_0283
PULPROG      zgpg30
TD           65536
SOLVENT      CDCl3
NS           1024
DS           4
SWH          23751.904 Hz
FIDRES       0.308261 Hz
AQ           1.1010048 sec
RG           205.72
DW           16.800 usec
DE           6.50 usec
TE           295.1 K
D1           2.0000000 sec
D11          0.0300000 sec
TD0          1
SFO1         125.7703643 MHz
NUC1         13C
P1           9.75 usec
PLW1         94.0000000 W
SFO2         500.1320005 MHz
NUC2         1H
CPDPRG[2]   waltz16
PCPD2       80.00 usec
PLW2         25.0000000 W
PLW12        0.46495000 W
PLW13        0.23387000 W

F2 - Processing parameters
SI           32768
SF           125.7577734 MHz
AQW          BM
SSE          0
LA           1.00 Hz
GB           0
PC           1.40

```

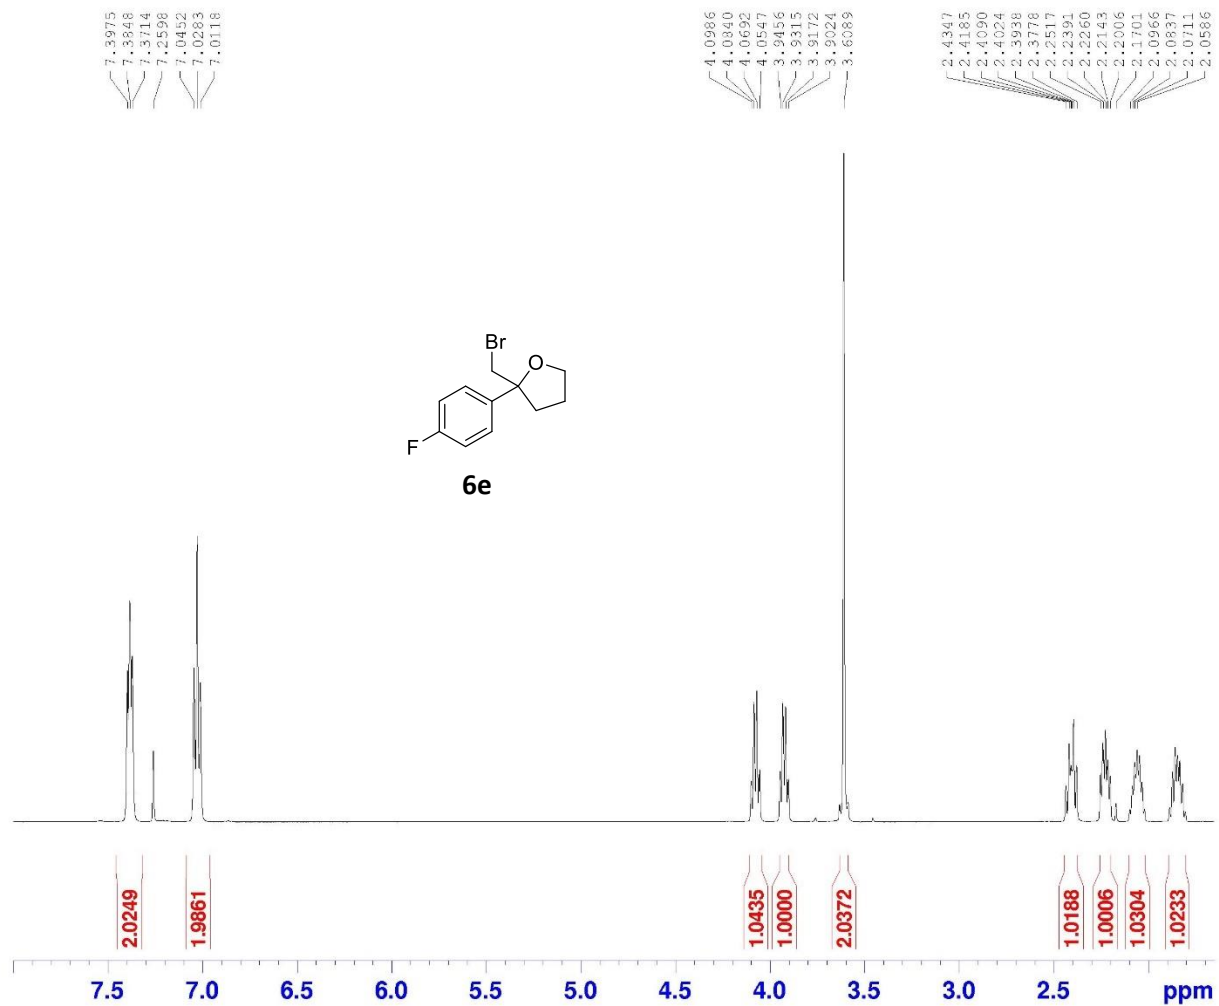

Current Data Parameters  
NAME JWC520 data  
EXPNO 1  
PROCNO 1

F2 - Acquisition Parameters  
Date\_ 20201210  
Time 22.38 h  
INSTRUM spect  
PROBHD Z119470\_0283  
PULPROG zg30  
TD 65536  
SOLVENT CDCl3  
NS 16  
DS 2  
SWH 10000.000 Hz  
FIDRES 0.305176 Hz  
AQ 3.2767999 sec  
RG 83.35  
DW 50.000 usec  
DE 6.50 usec  
TE 295.1 K  
D1 1.00000000 sec  
TDO 1  
SFO1 500.1330683 MHz  
NUC1 1H  
P1 10.91 usec  
PLW1 25.00000000 W

F2 - Processing parameters  
SI 65536  
SF 500.1300122 MHz  
WDW EM  
SSB 0  
LB 0.30 Hz  
GB 0  
PC 1.00

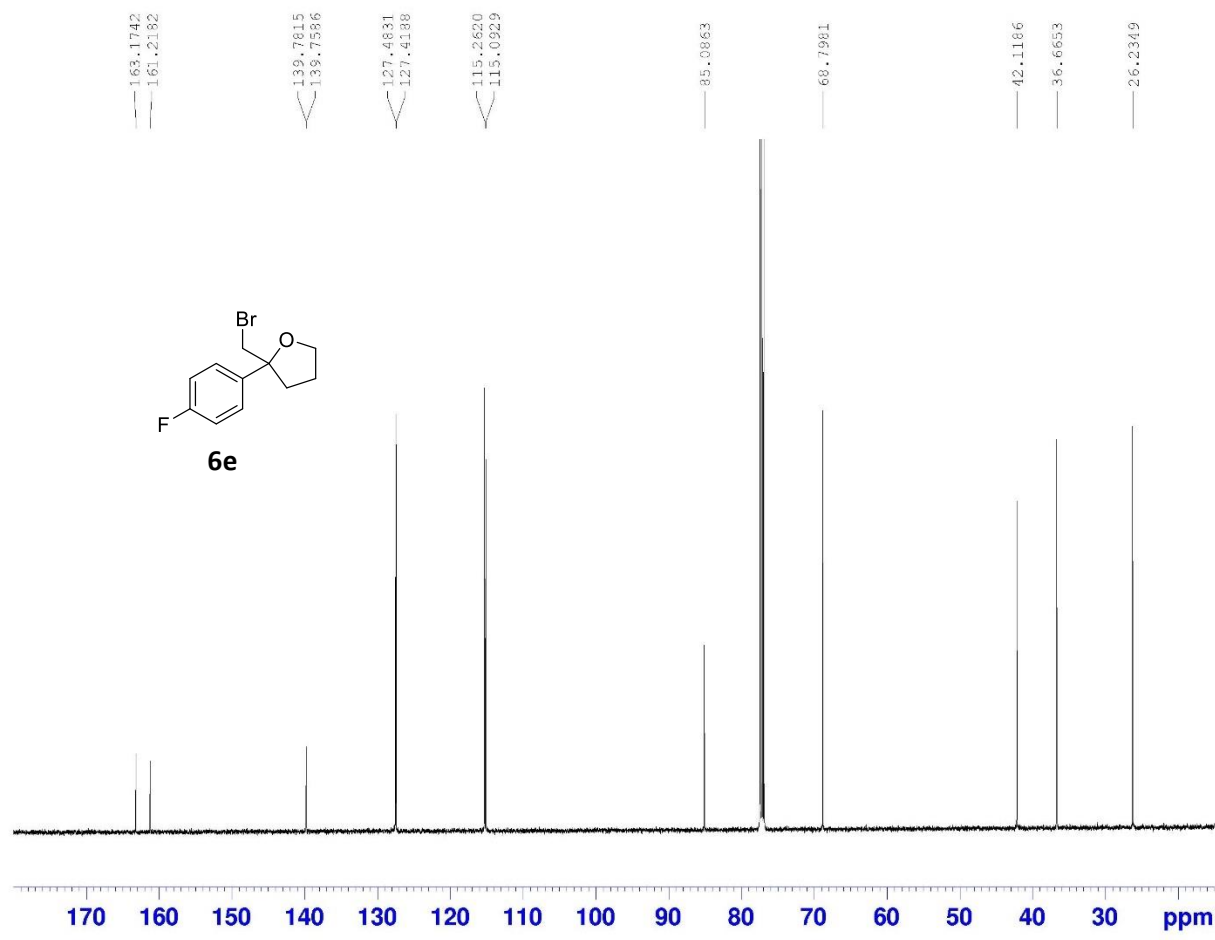

```

Current Data Parameters
NAME          JWC520 data
EXPNO        2
PROCNO       1

F2 - Acquisition Parameters
Data_        20201210
Time_        23.33 h
INSTRUM      spect
PROBHD       5119470_0283
PULPROG      zgpg30
TD           65536
SOLVENT      CDC13
NS           1024
DS           4
SWH          23751.904 Hz
FIDRES       0.308261 Hz
AQ           1.1010048 sec
RG           205.72
DW           16.800 usec
DE           6.50 usec
TE           295.2 K
D1           2.0000000 sec
D11          0.0300000 sec
TD0          1
SFO1         125.7703643 MHz
NUC1         13C
P1           9.75 usec
PLW1         94.0000000 W
SFO2         500.1320005 MHz
NUC2         1H
CPDPRG[2]    waltz16
PCPD2        80.00 usec
PLW2         25.0000000 W
PLW12        0.46495000 W
PLW13        0.23387000 W

F2 - Processing parameters
SI           32768
SF           125.7577752 MHz
AQW          0
SSE          0
LA           1.00 Hz
GB           0
PC           1.40
  
```

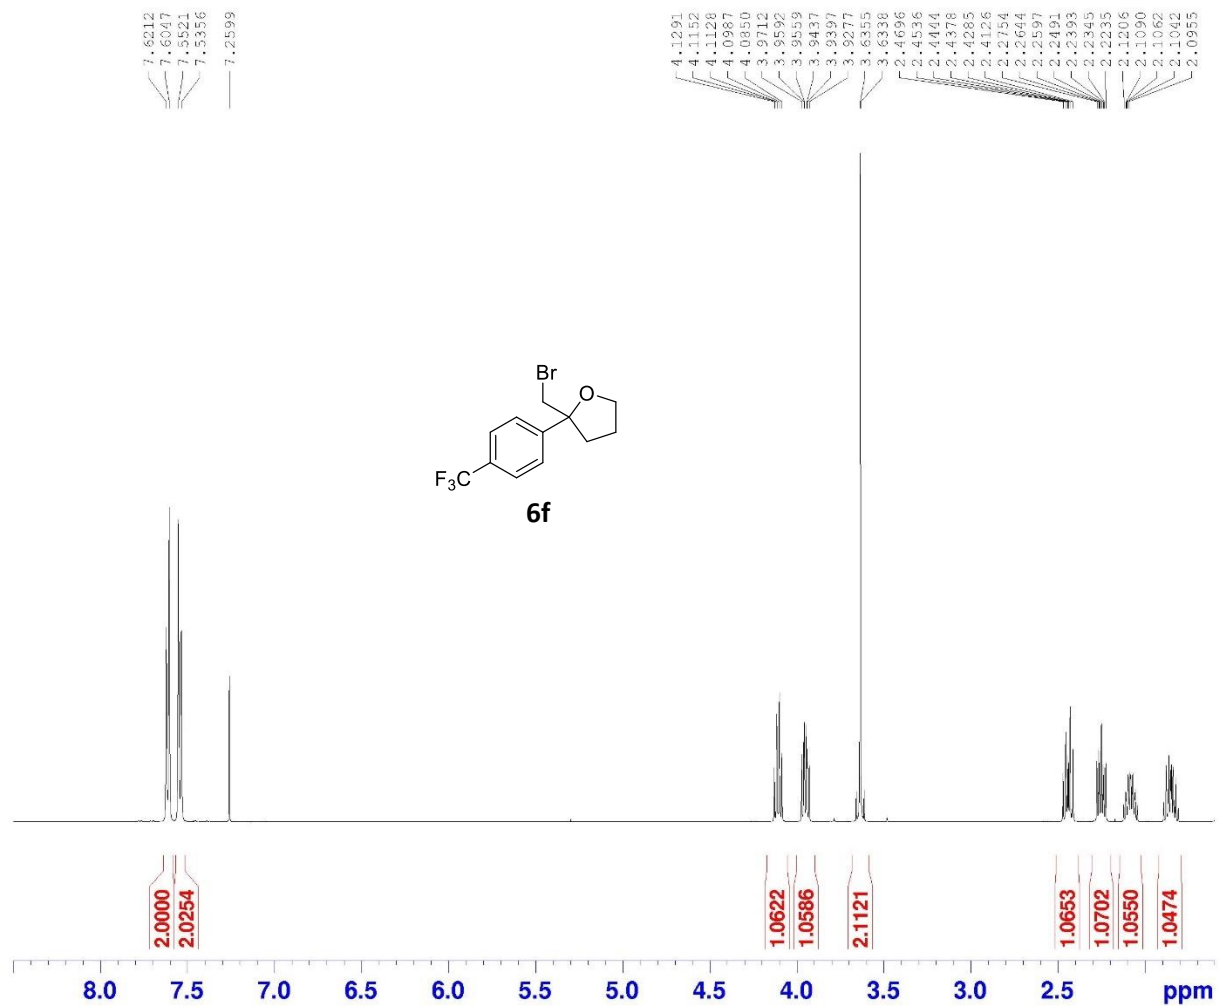

Current Data Parameters

NAME JWC519 data  
 EXPNO 1  
 PROCNO 1

F2 - Acquisition Parameters

Date\_ 20201208  
 Time 18.38 h  
 INSTRUM spect  
 PROBRD M119470\_0283  
 EULPROG zg30  
 TD 65536  
 SOLVENT CDCl3  
 NS 16  
 DS 2  
 SWH 10000.000 Hz  
 FIDRES 0.305176 Hz  
 AQ 3.2767999 sec  
 RG 83.35  
 DW 50.000 usec  
 DE 6.50 usec  
 TE 295.2 K  
 D1 1.00000000 sec  
 TD0 1  
 SPOL 500.1330683 MHz  
 NUC1 1H  
 P1 10.91 usec  
 PLW1 25.00000000 W

F2 - Processing parameters

SZ 65536  
 SF 500.1300122 MHz  
 WDW EM  
 SSB 0  
 LB 0.30 Hz  
 GB 0  
 PC 1.00

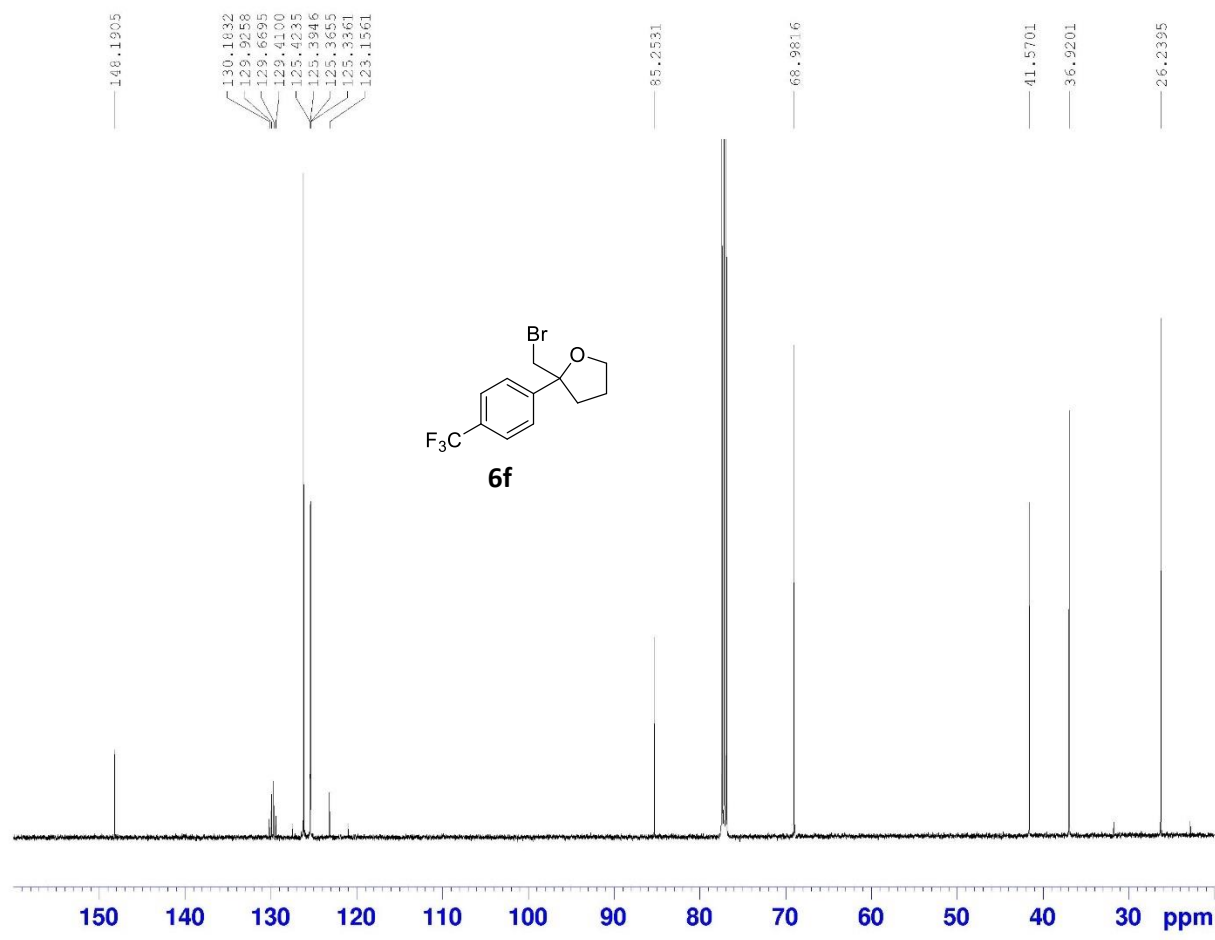

148.1905  
 130.1832  
 129.9258  
 129.6695  
 129.4100  
 125.4235  
 125.3946  
 125.3655  
 125.3361  
 123.1561

85.2531  
 68.9816  
 41.5701  
 36.9201  
 26.2395

```

Current Data Parameters
NAME          JWC519 data
EXPNO        2
PROCNO       1

F2 - Acquisition Parameters
Data_        20201208
Time_        22.23 h
INSTRUM      spect
PROBHD       W119470_0283
PULPROG      zgpg30
TD           65536
SOLVENT      CDCl3
NS           1024
DS           4
SWH          29761.904 Hz
FIDRES       0.308261 Hz
AQ           1.1010048 sec
RG           205.72
DW           16.800 usec
DE           6.50 usec
TE           295.1 K
D1           2.0000000 sec
D11          0.0300000 sec
TD0          1
SFO1         125.7703643 MHz
NUC1         13C
P1           9.75 usec
PLW1         94.0000000 W
SFO2         500.1320005 MHz
NUC2         1H
CPDPRG[2]   waltz16
PCPD2       80.00 usec
PLW2         25.0000000 W
PLW12        0.46495000 W
PLW13        0.23387000 W

F2 - Processing parameters
SI           32768
SF           125.7577734 MHz
AQW         BM
SSE         0
LA           1.00 Hz
GB           0
PC           1.40
  
```

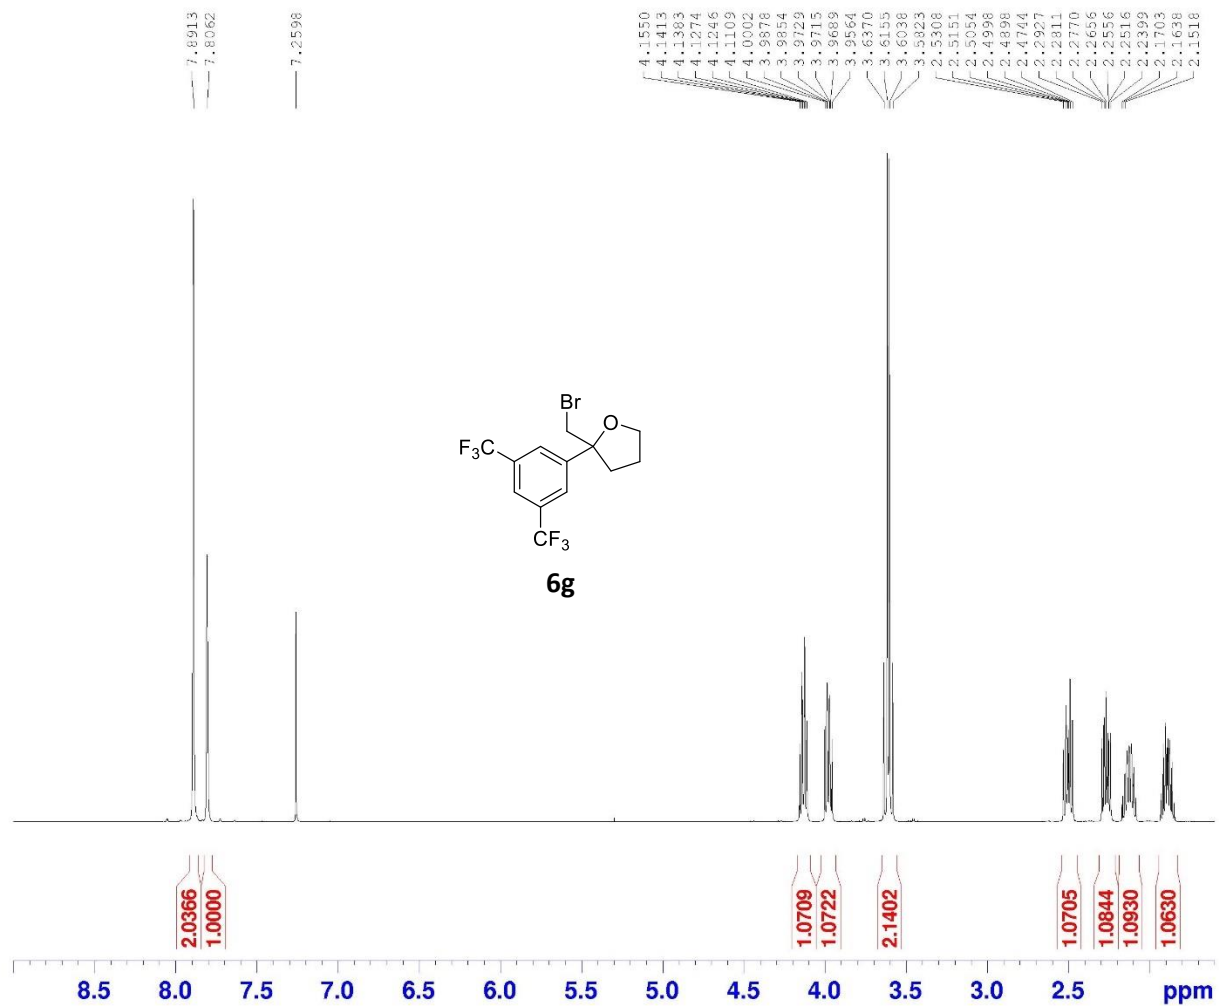

Current Data Parameters  
 NAME JWC518 data  
 EXPNO 1  
 PROCNO 1

F2 - Acquisition Parameters  
 Date\_ 20201207  
 Time 21.18 h  
 INSTRUM spect  
 PROBRD M119470\_0283  
 EULPROG zg30  
 TD 65536  
 SOLVENT CDCl3  
 NS 16  
 DS 2  
 SWH 10000.000 Hz  
 FIDRES 0.305176 Hz  
 AQ 3.2767999 sec  
 RG 83.35  
 DW 50.000 usec  
 DE 6.50 usec  
 TG 295.1 K  
 D1 1.00000000 sec  
 TDO 1  
 SPOL 500.1330683 MHz  
 NUC1 1H  
 P1 10.91 usec  
 PLW1 25.00000000 W

F2 - Processing parameters  
 SZ 65536  
 SF 500.1300124 MHz  
 WDW EM  
 SSB 0  
 LB 0.30 Hz  
 GB 0  
 PC 1.00

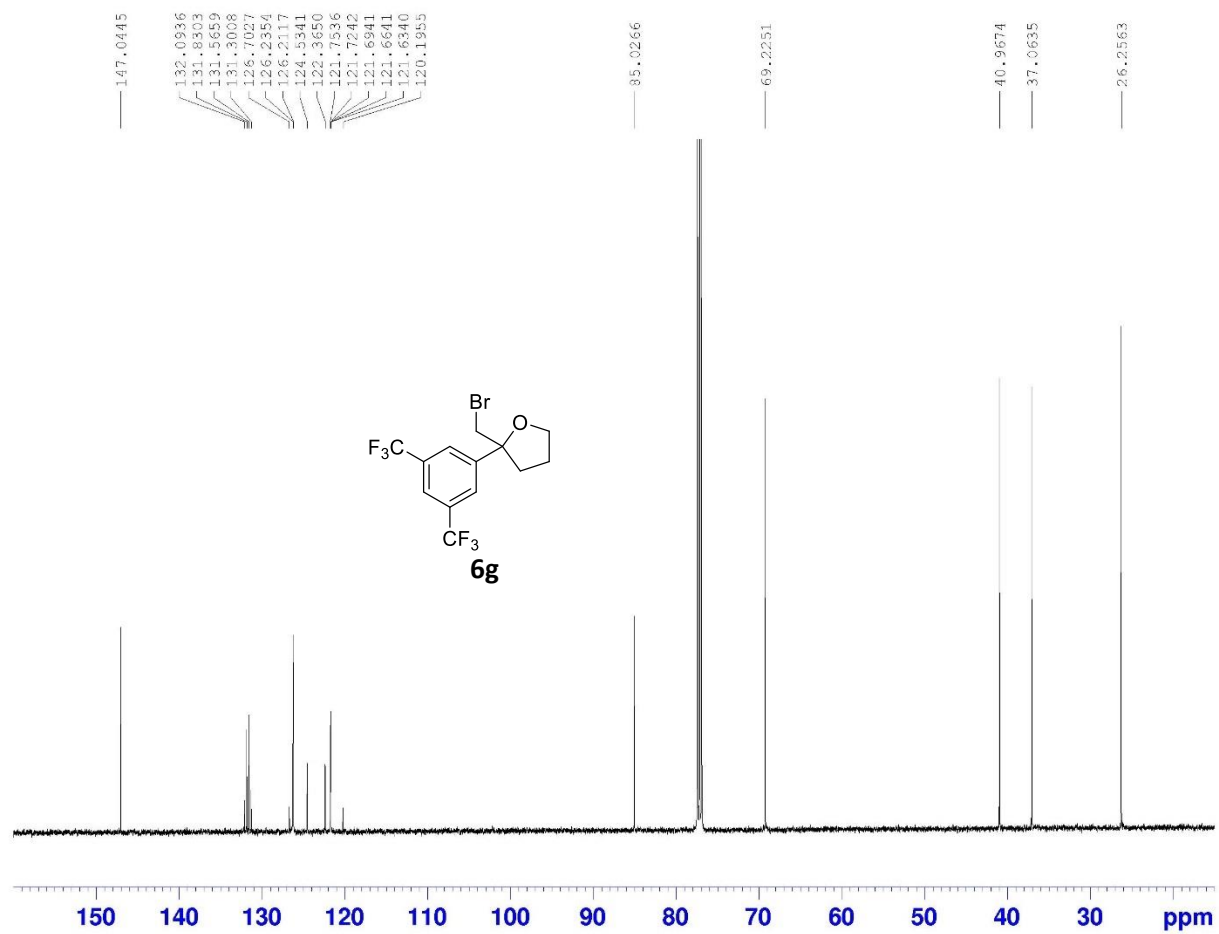

```

Current Data Parameters
NAME      JWC518 data
EXPNO    2
PROCNO   1

F2 - Acquisition Parameters
Data_    20201207
Time     22.37 h
INSTRUM  spect
PROBHD   Z119470_0283
PULPROG  zgpg30
TD       65536
SOLVENT  CDC13
NS       700
DS       4
SWH      31250.000 Hz
FIDRES   0.393674 Hz
AQ       1.0485760 sec
RG       206.72
DW       16.000 usec
DE       6.50 usec
TE       295.2 K
D1       2.0000000 sec
D11      0.0300000 sec
TD0      1
SFO1     125.7703643 MHz
NUC1     13C
P1       9.75 usec
PLW1     94.0000000 W
SFO2     500.1320005 MHz
NUC2     1H
CPDPRG[2] waltz16
PCPD2    80.00 usec
PLW2     25.0000000 W
PLW12    0.46495000 W
PLW13    0.23387000 W

F2 - Processing parameters
SI       32768
SF       125.7577722 MHz
AQW      BM
SSE      0
LA       1.00 Hz
GB       0
PC       1.40

```

7.5972  
7.5940  
7.5848  
7.5823  
7.5798  
7.4968  
7.4918  
7.4790  
7.4725  
7.4691  
7.4640  
7.4553  
7.4538  
7.4491  
7.4178  
7.4148  
7.4110  
7.4009  
7.3976  
7.3886  
7.3860  
7.3753  
7.3723  
7.3693  
7.3635  
7.3582  
7.2598  
6.2485  
6.2394  
6.2325  
6.2234

3.8452  
3.8291  
3.8233  
3.8073  
3.7623  
3.7532  
3.7404  
3.7314

```

Current Data Parameters
NAME      JWC393pm A pure
EXPNO     1
PROCNO    1

F2 - Acquisition Parameters
Data_     20190704
Time      23.20 h
INSTRUM   spect
PROBHD    Z149001_0010
PULPROG   zg30
TD         65536
SOLVENT   CDCl3
NS         16
DS         2
SWH        10000.000 Hz
FIDRES     0.305176 Hz
AQ         3.2767999 sec
RG         30.85
DW         50.000 usec
DE         10.00 usec
TE         298.0 K
D1         1.00000000 sec
TD0        1
SFO1      500.1330883 MHz
NUC1       1H
P1         11.25 usec
PLW1      15.00000000 W

F2 - Processing parameters
SI         65536
SF         500.1300123 MHz
WDW        EM
SSB        0
LB         0.30 Hz
GB         0
PC         1.00

```

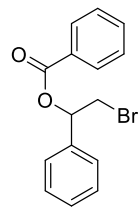

**9aa**

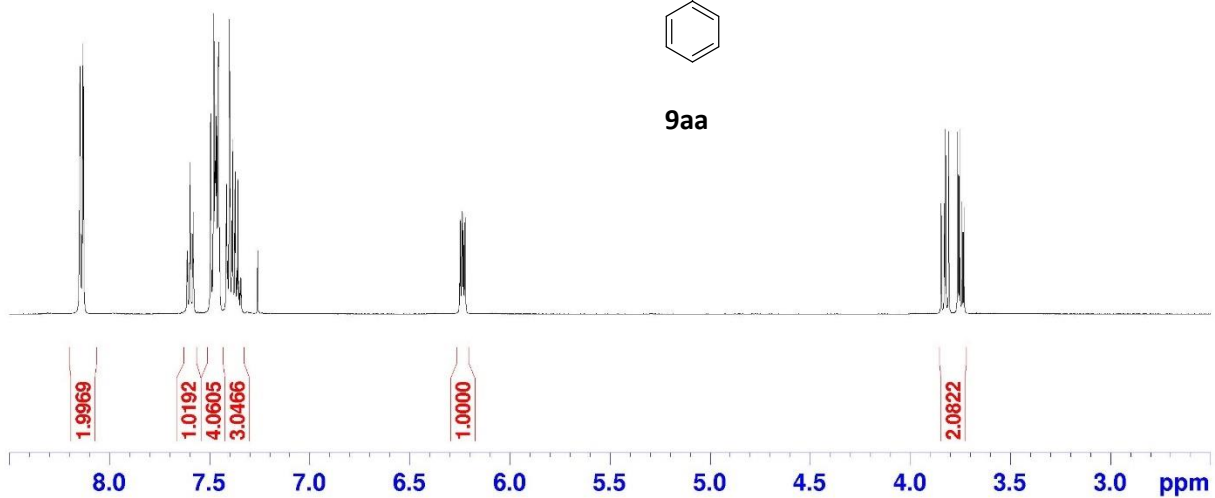



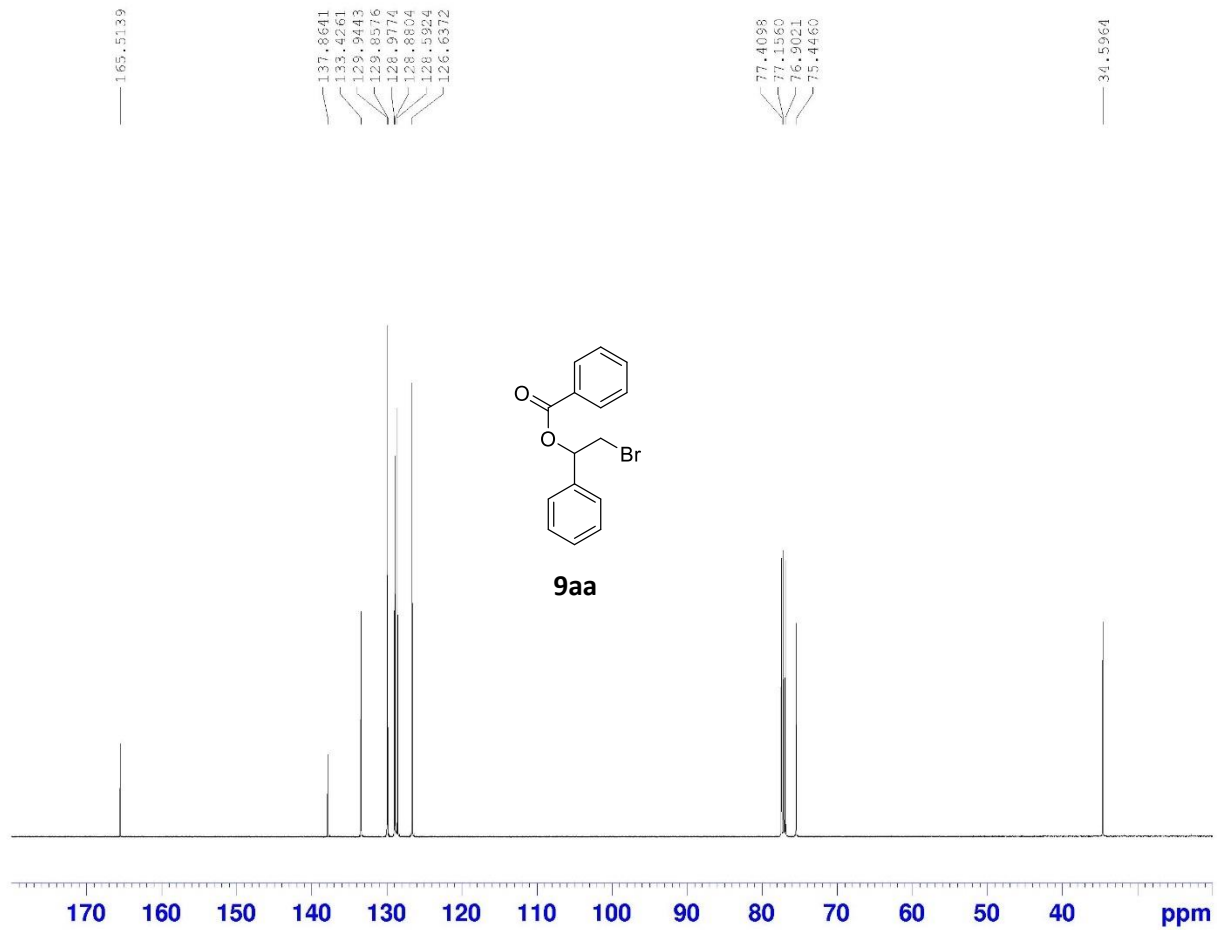

```

Current Data Parameters
NAME      JWC393pm A pure
EXPNO    2
PROCNO   1

F2 - Acquisition Parameters
Data_    20190704
Time_    23.52 h
INSTRUM  spect
PROBHD   Z149001_0010
PULPROG  zgpg30
TD        55536
SOLVENT  CDCl3
NS        600
DS        4
SWH       23761.904 Hz
FIDRES    0.308261 Hz
AQ        1.1010048 sec
RG        205.72
DW        16.800 usec
DE        18.00 usec
TK        298.0 K
D1        2.00000000 sec
D11       0.03000000 sec
TD0       1
SFO1      125.7703643 MHz
NUC1      13C
P1        10.00 usec
PLW1      61.00000000 W
SFO2      500.1320005 MHz
NUC2      1H
CFDRG[2]  waltz16
PCPD2     80.00 usec
PLW2      15.00000000 W
PLW12     0.29663000 W
ELW13     0.14920001 W

F2 - Processing parameters
SI        32768
SF        125.7577789 MHz
AQW       BM
SSE       0
LA        1.00 Hz
GB        0
PC        1.40
  
```

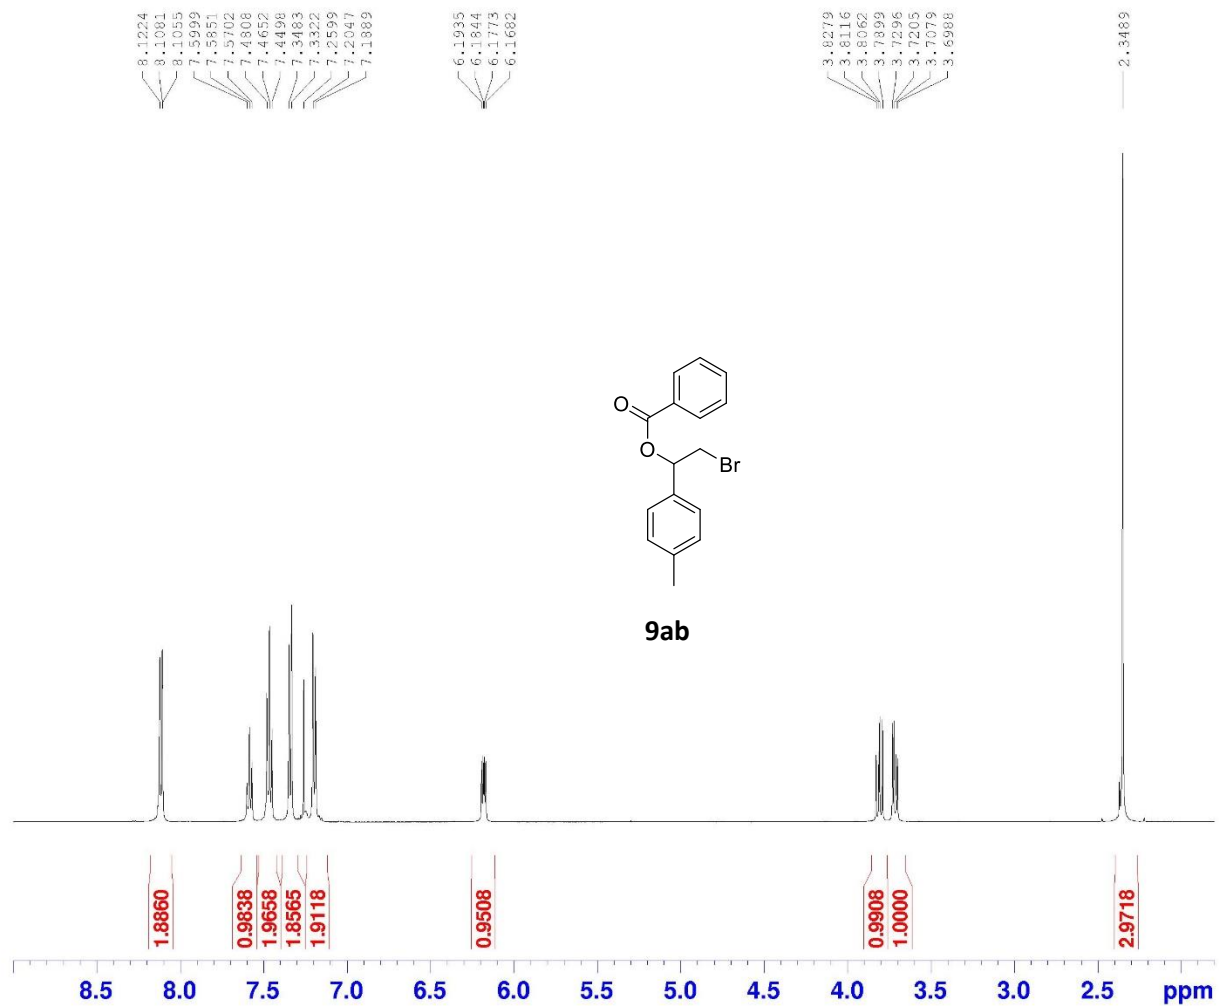

Current Data Parameters  
NAME JWC525.p3  
EXPNO 1  
PROCNO 1

F2 - Acquisition Parameters  
Date\_ 20200722  
Time 18.45 h  
INSTRUM spect  
PROBHD Z119470\_0283 |  
PULPROG zg30  
TD 65536  
SOLVENT CDCl3  
NS 16  
DS 2  
SWH 10000.000 Hz  
FIDRES 0.305176 Hz  
AQ 3.2767999 sec  
RG 102.6  
DW 50.000 usec  
DE 6.50 usec  
TE 295.1 K  
D1 1.00000000 sec  
TDO 1  
SFO1 500.1330883 MHz  
NUC1 1H  
P1 10.00 usec  
PLW1 25.00000000 W

F2 - Processing parameters  
SI 65536  
SF 500.1300125 MHz  
WDW EM  
SSB 0  
LB 0.30 Hz  
GB 0  
PC 1.00

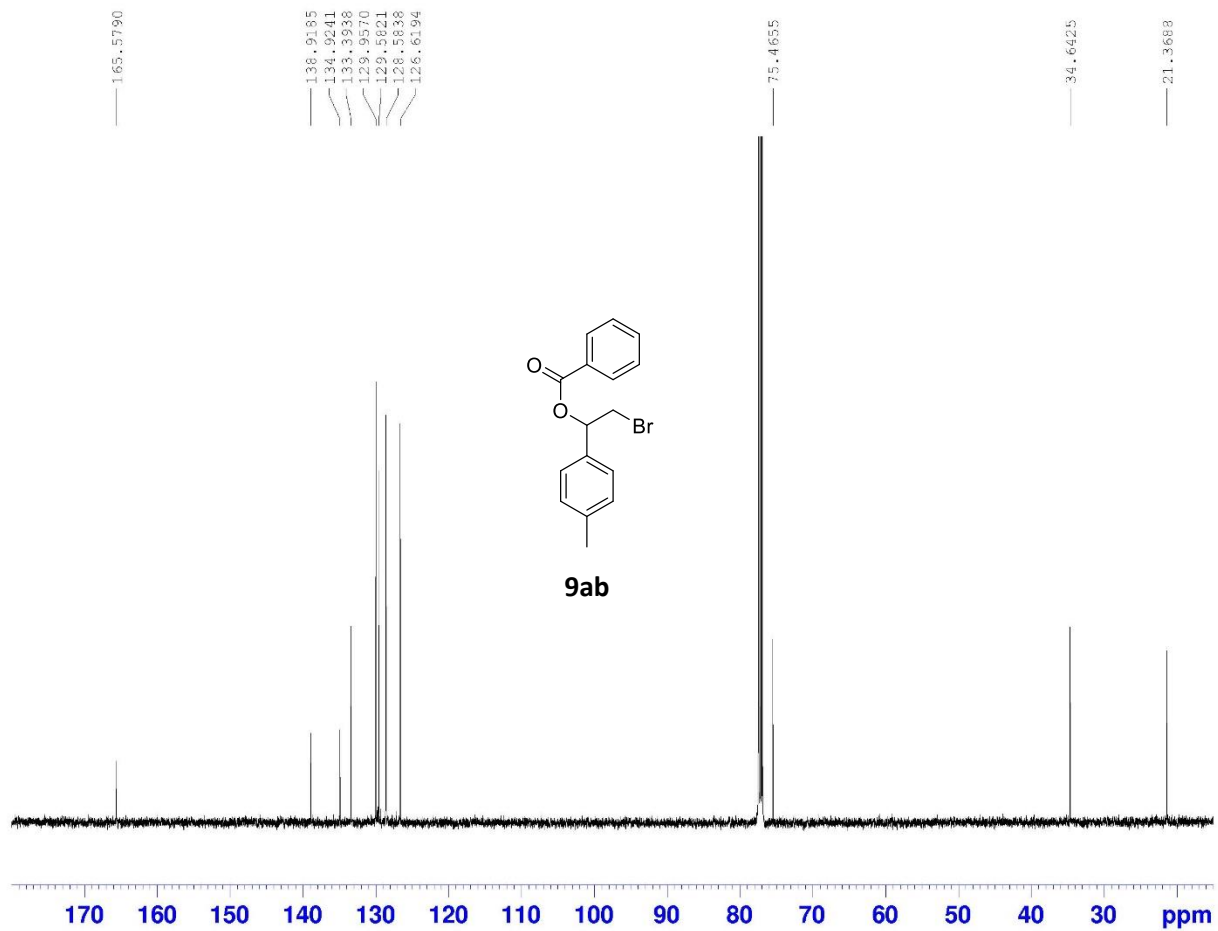

Current Data Parameters  
NAME JWC501 data  
EXPNO 2  
PROCNO 1

F2 - Acquisition Parameters  
Date\_ 20201123  
Time 21.47 h  
INSTRUM spect  
PROBHD Z119470\_0283 (   
PULPROG zgpg30  
TD 85536  
SOLVENT CDCl3  
NS 600  
DS 4  
SWH 25761.904 Hz  
FIDRES 0.908261 Hz  
AQ 1.1010048 sec  
RG 206.72  
DW 16.800 usec  
DE 6.50 usec  
TE 295.2 K  
D1 2.0000000 sec  
D11 0.0300000 sec  
TD0 1  
SFO1 125.7703643 MHz  
NUC1 13C  
P1 9.75 usec  
PLW1 94.0000000 W  
SFO2 500.1320005 MHz  
NUC2 1H  
CPDPRG[2] waltz16  
PCPD2 80.00 usec  
PLW2 25.0000000 W  
PLW12 0.46495000 W  
PLW13 0.23387000 W

F2 - Processing parameters  
SI 32768  
SF 125.7577738 MHz  
WDW EM  
SSB 0  
LB 1.00 Hz  
GB 0  
PC 1.40

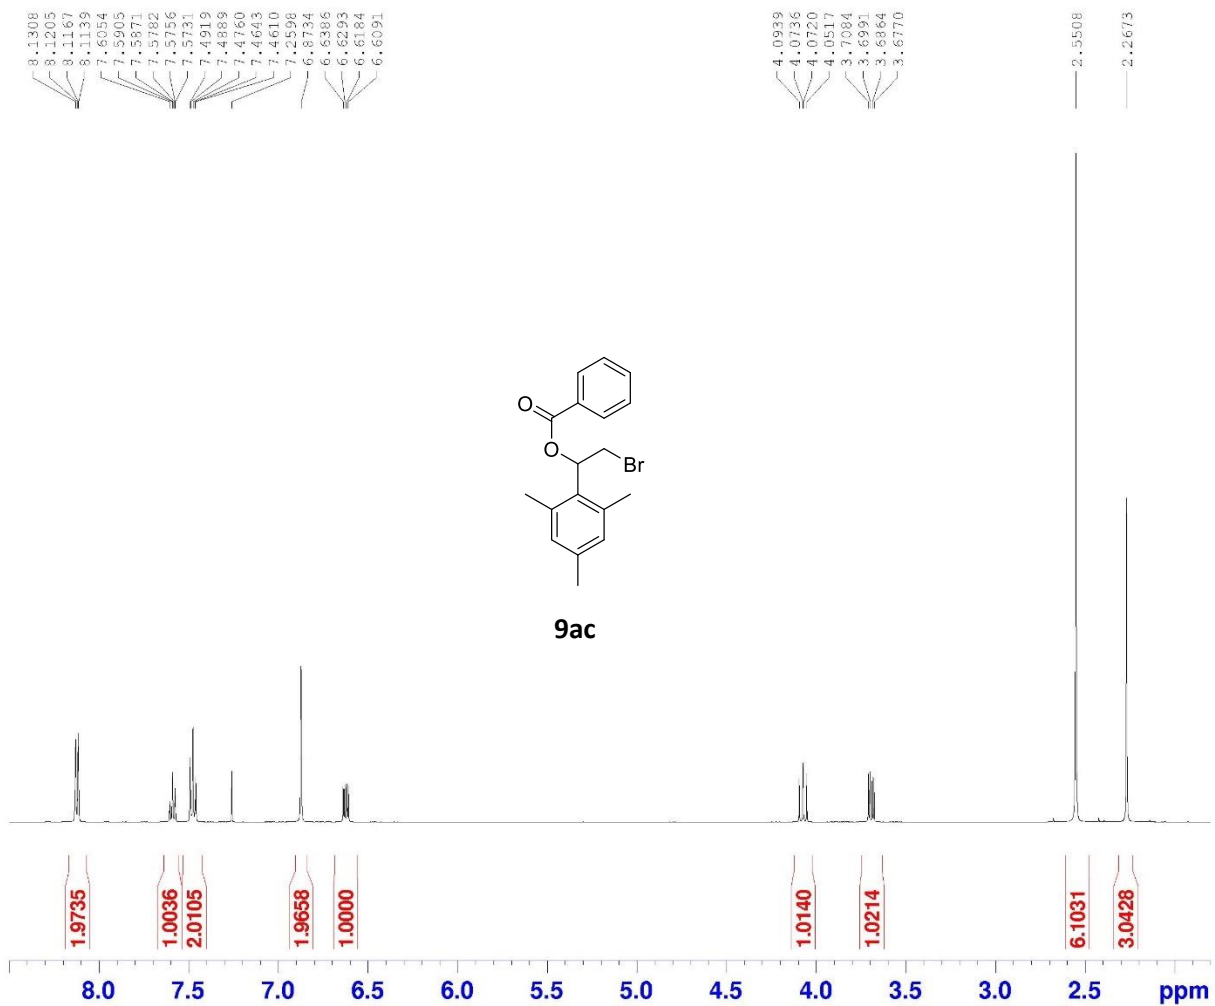

Current Data Parameters  
NAME JWC393pm B pure  
EXPNO 1  
PROCNO 1

F2 - Acquisition Parameters  
Date\_ 20190704  
Time 23.55 h  
INSTRUM spect  
PROBHD Z149001\_0010  
PULPROG zg30  
TD 65536  
SOLVENT CDCl3  
NS 16  
DS 2  
SWH 10000.000 Hz  
FIDRES 0.305176 Hz  
AQ 3.2767999 sec  
RG 30.85  
DW 50.000 usec  
DE 10.00 usec  
TE 298.0 K  
D1 1.00000000 sec  
TDO 1  
SFO1 500.1330883 MHz  
NUC1 1H  
P1 11.25 usec  
PLW1 15.00000000 W

F2 - Processing parameters  
SZ 65536  
SF 500.1300123 MHz  
WDW EM  
SSB 0  
LB 0.30 Hz  
GB 0  
PC 1.00

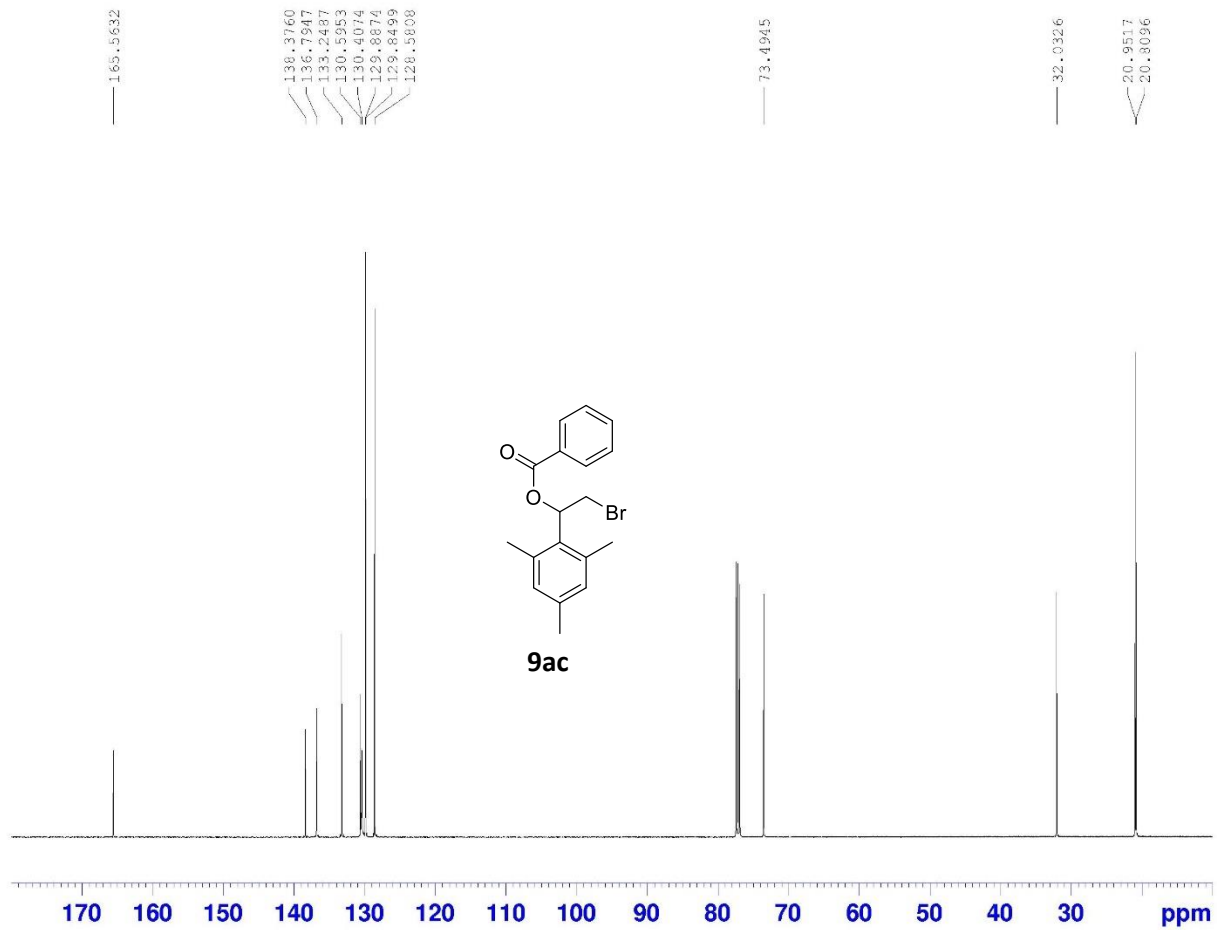

```

Current Data Parameters
NAME      JWC393pm B gunc
EXPNO    2
PROCNO   1

F2 - Acquisition Parameters
Data_    20190705
Time_    0.27 h
INSTRUM  spect
PROBHD   Z149001_0010
PULPROG  zgpg30
TD       55536
SOLVENT  CDC13
NS       600
DS       4
SWH      23751.904 Hz
FIDRES   0.308261 Hz
AQ       1.1010048 sec
RG       205.72
DW       16.800 usec
DE       18.00 usec
TE       298.0 K
D1       2.0000000 sec
D11      0.0300000 sec
TD0      1
SFO1     125.7703643 MHz
NUC1     13C
P1       10.00 usec
PLW1     61.0000000 W
SFO2     500.1320005 MHz
NUC2     1H
CPDPRG[2] waltz16
PCPD2    80.00 usec
PLW2     15.0000000 W
PLW12    0.29663000 W
ELW13    0.14920001 W

F2 - Processing parameters
SI       32768
SF       125.7577815 MHz
AQW      BM
SSE      0
LA       1.00 Hz
GB       0
PC       1.40

```

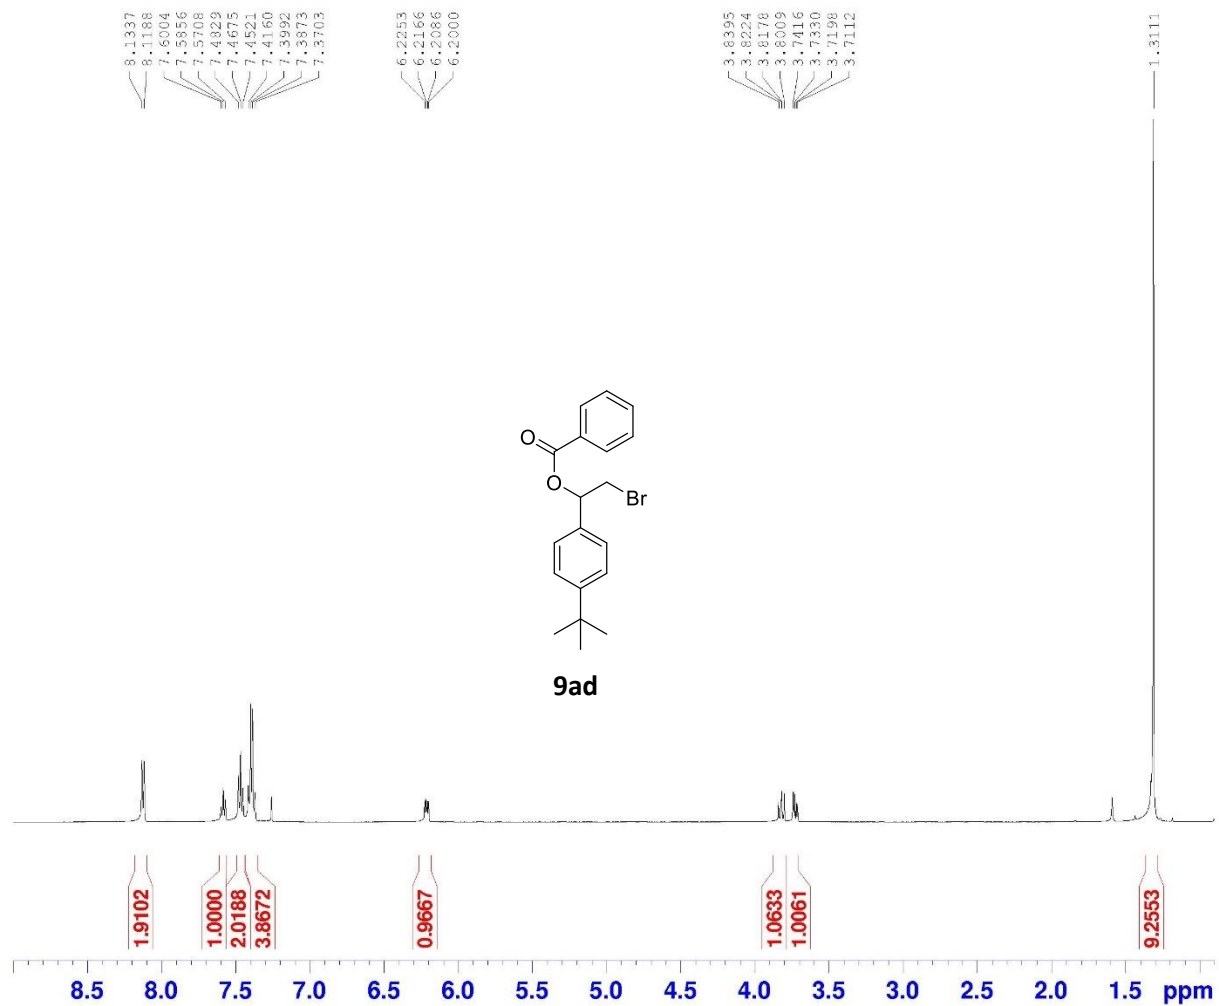

Current Data Parameters  
NAME JWC502 data  
EXPNO 1  
PROCNO 1

F2 - Acquisition Parameters  
Date\_ 20201123  
Time 20.33 h  
INSTRUM spect  
PROBHD 5119470\_0283  
PULPROG zg30  
TD 65536  
SOLVENT CDCl3  
NS 9  
DS 2  
SWH 10000.000 Hz  
FIDRES 0.305176 Hz  
AQ 3.2767999 sec  
RG 71.76  
DW 50.000 usec  
DE 6.50 usec  
TE 295.1 K  
D1 1.00000000 sec  
TDO 1  
SFO1 500.1330683 MHz  
NUC1 1H  
P1 10.91 usec  
PLW1 25.00000000 W

F2 - Processing parameters  
SI 65536  
SF 500.1300127 MHz  
WDW EM  
SSB 0  
LB 0.30 Hz  
GB 0  
PC 1.00

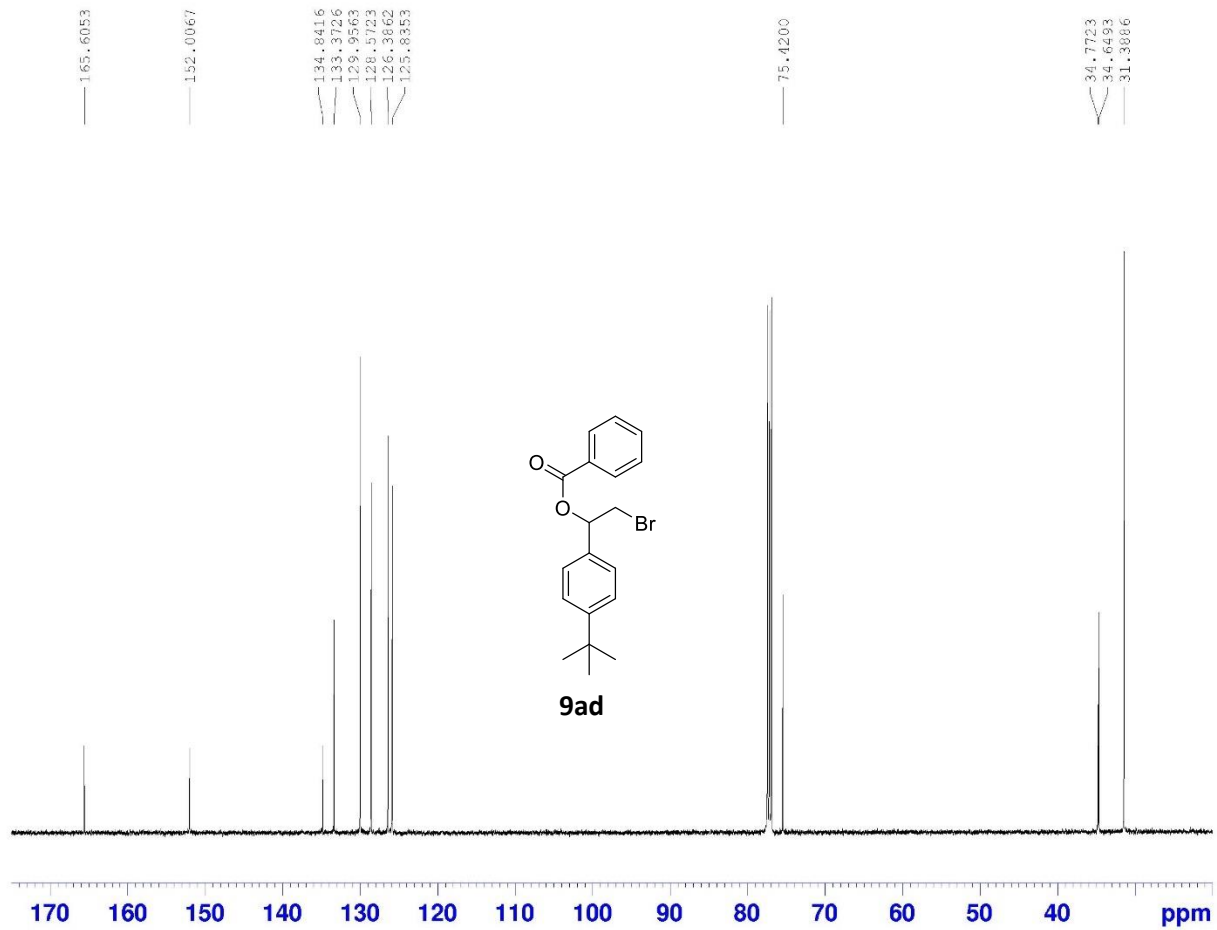

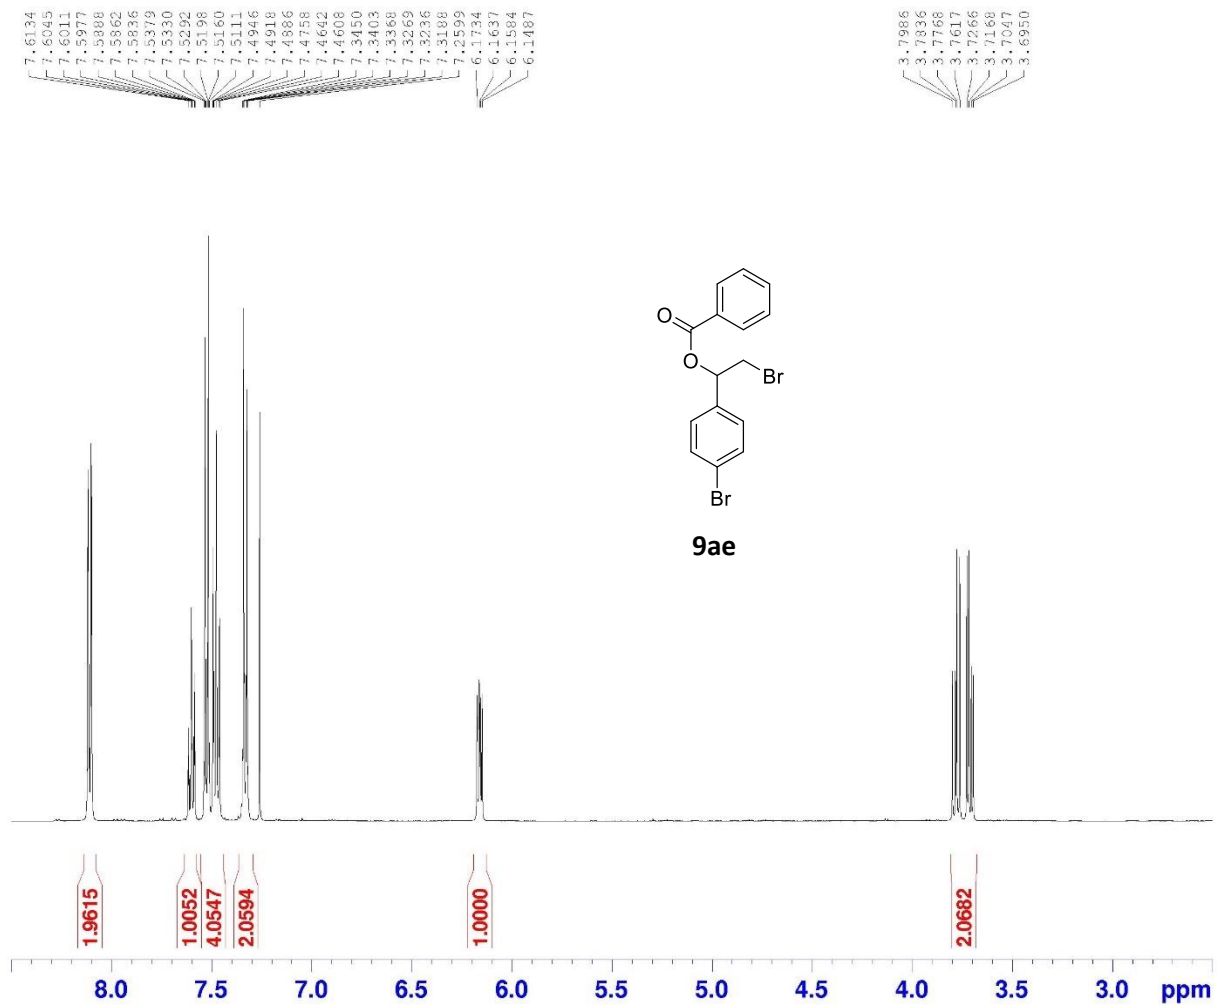



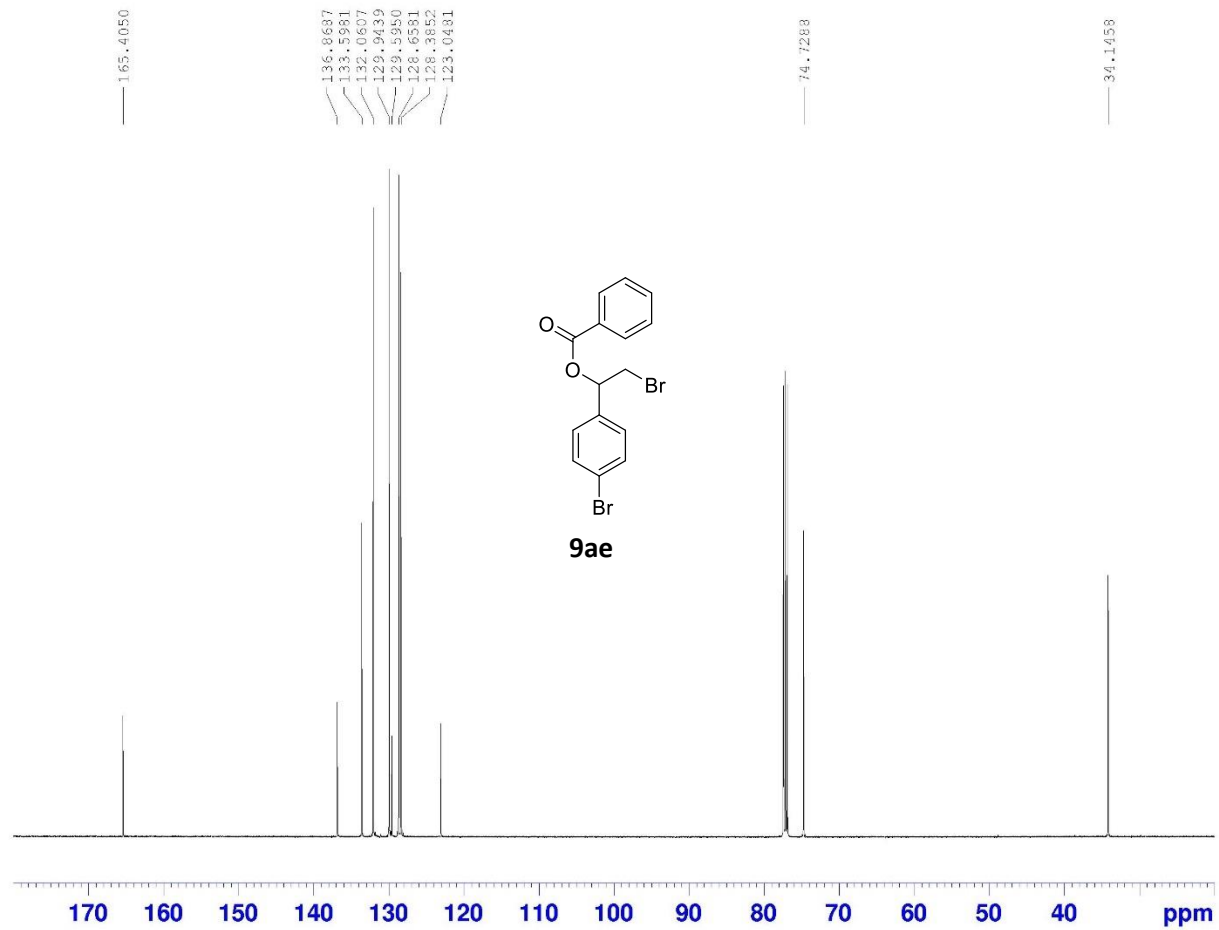

```

Current Data Parameters
NAME      JWC372 gm pure
EXPNO    2
PROCNO   1

F2 - Acquisition Parameters
Data_    20190621
Time_    0.49 h
INSTRUM  spect
PROBHD   Z149001_0010
PULPROG  zgpg30
TD       55536
SOLVENT  CDCl3
NS       800
DS       4
SWH      23751.904 Hz
FIDRES   0.308261 Hz
AQ       1.1010048 sec
RG       205.72
DW       16.800 usec
DE       18.00 usec
TE       298.0 K
D1       2.0000000 sec
D11      0.0300000 sec
TD0      1
SFO1     125.7703643 MHz
NUC1     13C
P1       10.00 usec
PLW1     61.0000000 W
SFO2     500.1320005 MHz
NUC2     1H
CFDPRG[2] waltz16
PCPD2    80.00 usec
PLW2     15.0000000 W
PLW12    0.29663000 W
ELW13    0.14920001 W

F2 - Processing parameters
SI       32768
SF       125.7577771 MHz
AQW      BM
SSE      0
LA       1.00 Hz
GB       0
PC       1.40

```

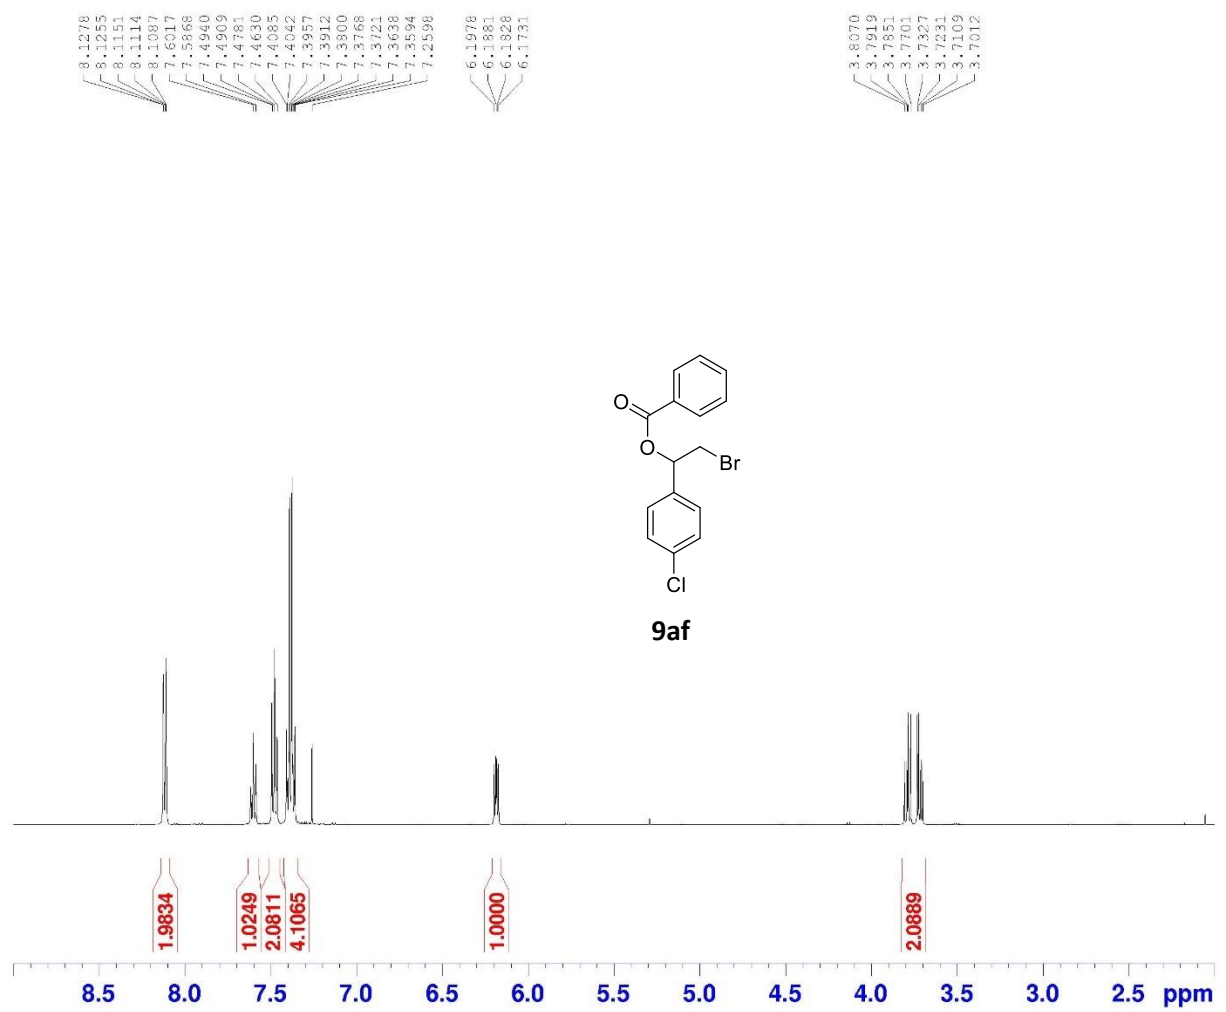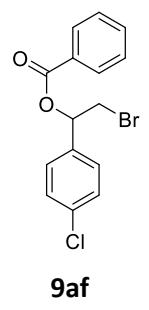

Current Data Parameters  
NAME JWC370 gm pure  
EXPNO 1  
PROCNO 1

F2 - Acquisition Parameters  
Date\_ 20190620  
Time 23.21 h  
INSTRUM spect  
PROBHD Z149001\_0010  
PULPROG zg30  
TD 65536  
SOLVENT CDCl3  
NS 16  
DS 2  
SWH 10000.000 Hz  
FIDRES 0.305176 Hz  
AQ 3.2767999 sec  
RG 30.85  
DW 50.000 usec  
DE 10.00 usec  
TE 298.0 K  
D1 1.00000000 sec  
TDO 1  
SFO1 500.1330883 MHz  
NUC1 1H  
P1 11.25 usec  
PLW1 15.00000000 W

F2 - Processing parameters  
SI 65536  
SF 500.1300123 MHz  
WDW EM  
SSB 0  
LB 0.30 Hz  
GB 0  
PC 1.00

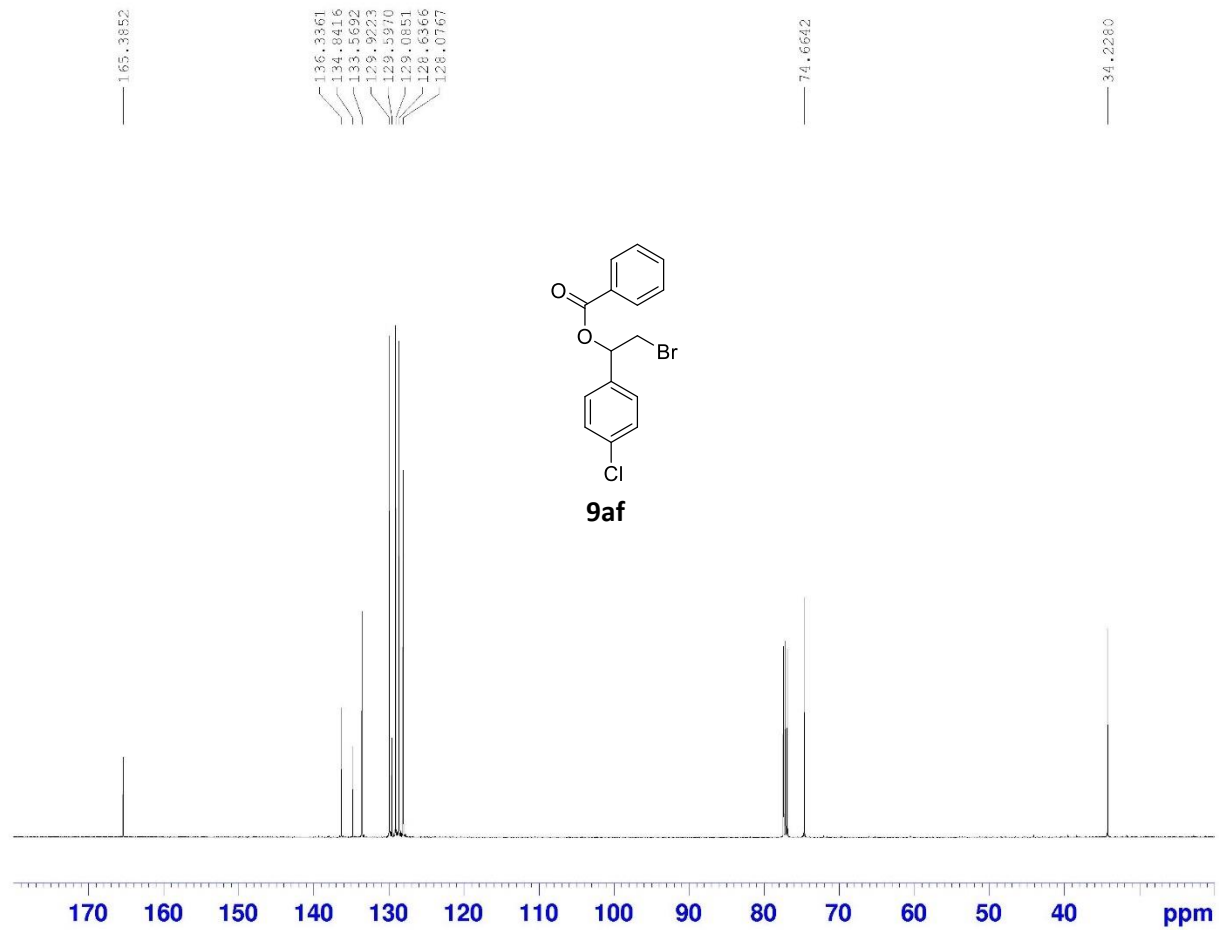

```

Current Data Parameters
NAME      JWC370 gm pure
EXPNO    2
PROCNO    1

F2 - Acquisition Parameters
Data_     20190621
Time_     0.03 h
INSTRUM   spect
PROBHD    Z149001_0010
PULPROG   zgpg30
TD        55536
SOLVENT   CDCl3
NS        800
DS        4
SWH        23761.904 Hz
FIDRES     0.308261 Hz
AQ         1.1010048 sec
RG         205.72
DW         16.800 usec
DE         18.00 usec
TE         298.0 K
D1         2.0000000 sec
D11        0.0300000 sec
TD0        1
SFO1       125.7703643 MHz
NUC1       13C
P1         10.00 usec
PLW1       61.0000000 W
SFO2       500.1320005 MHz
NUC2       1H
CFDPRG[2]  waltz16
PCPD2      80.00 usec
PLW2       15.0000000 W
PLW12      0.29663000 W
ELW13      0.14920001 W

F2 - Processing parameters
SI         32768
SF         125.7577807 MHz
AQ         0
SSE        0
LA         1.00 Hz
GB         0
PC         1.40

```

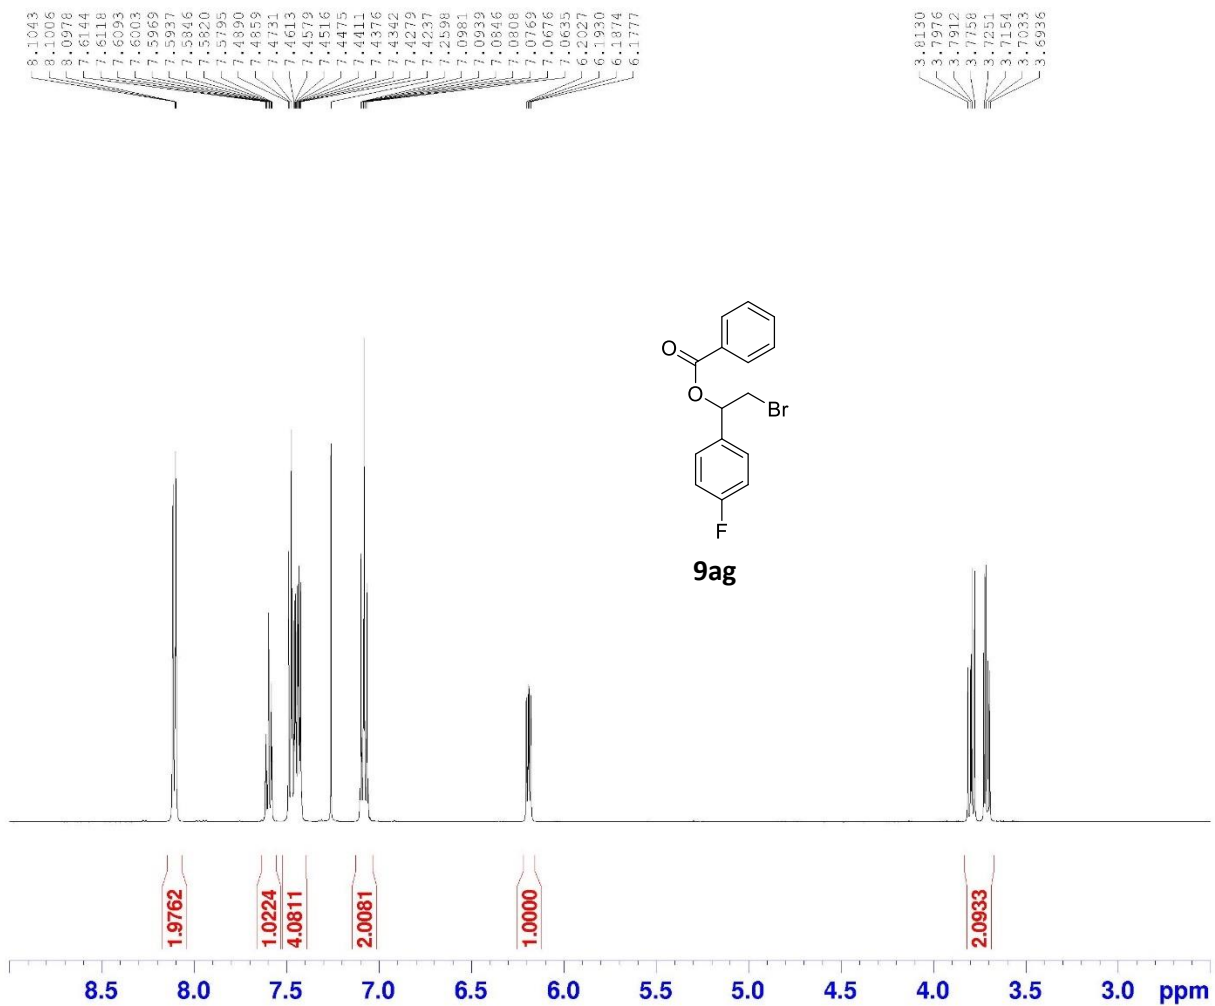

```

Current Data Parameters
NAME      JWC378 gm pure
EXPNO    1
PROCNO   1

F2 - Acquisition Parameters
Data_    20190621
Time     2.25 h
INSTRUM  spect
PROBHD   Z149001_0010
PULPROG  zg30
TD        65536
SOLVENT  CDCl3
NS        16
DS        2
SWH       10000.000 Hz
FIDRES    0.305176 Hz
AQ        3.2767999 sec
RG        50.6
DW        50.000 usec
DE        10.00 usec
TE        298.0 K
D1        1.00000000 sec
TD0       1
SFO1     500.1330683 MHz
NUC1      1H
P1        11.25 usec
PLW1     15.00000000 W

F2 - Processing parameters
SI        65536
SF        500.1300124 MHz
WDW       EM
SSB       0
LB        0.30 Hz
GB        0
PC        1.00

```

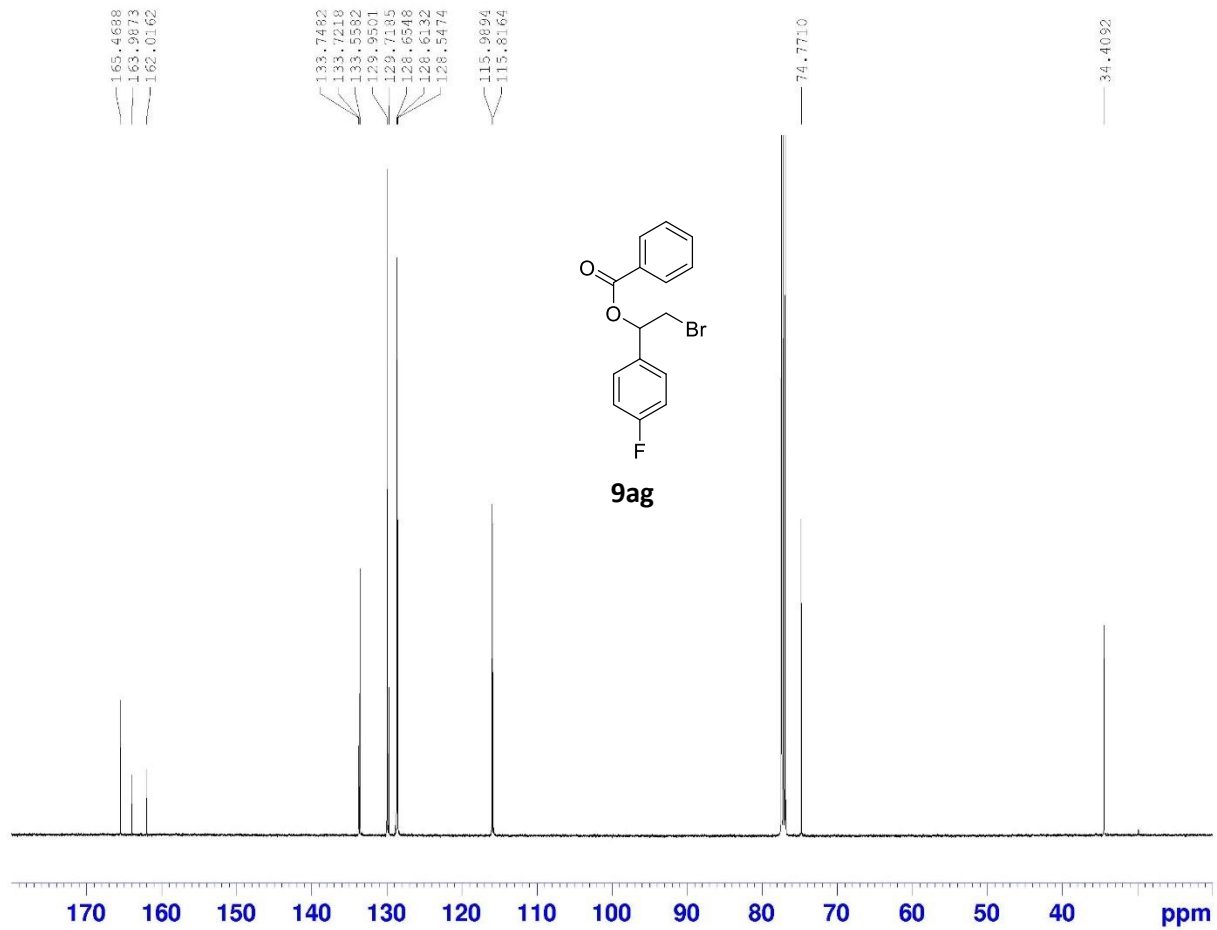

```

Current Data Parameters
NAME      JWC378 gm pure
EXPNO    2
PROCNO   1

F2 - Acquisition Parameters
Data_    20190621
Time     3.07 h
INSTRUM  spect
PROBHD   Z149001_0010
PULPROG  zgpg30
TD       55536
SOLVENT  CDCl3
NS       800
DS       4
SWH      23761.904 Hz
FIDRES   0.308261 Hz
AQ       1.1010048 sec
RG       205.72
DW       16.800 usec
DE       18.00 usec
TE       298.0 K
D1       2.0000000 sec
D11      0.0300000 sec
TD0      1
SFO1     125.7703643 MHz
NUC1     13C
P1       10.00 usec
PLW1     61.0000000 W
SFO2     500.1320005 MHz
NUC2     1H
CFDRG[2] waltz16
PCPD2    80.00 usec
PLW2     15.0000000 W
PLW12    0.29663000 W
ELW13    0.14920001 W

F2 - Processing parameters
SI       32768
SF       125.7577737 MHz
AQW      BM
SSE      0
LA       1.00 Hz
GB       0
PC       1.40

```

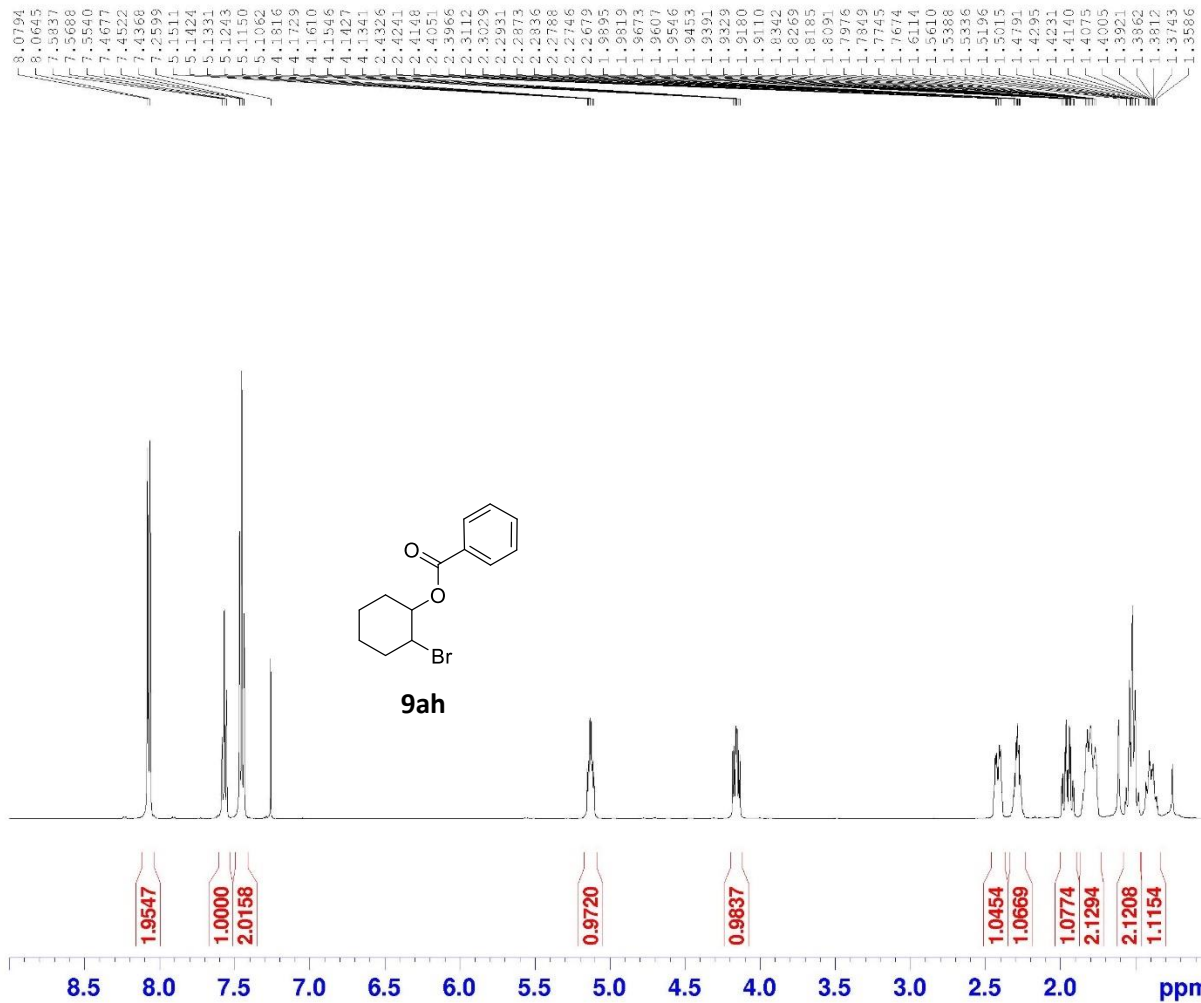

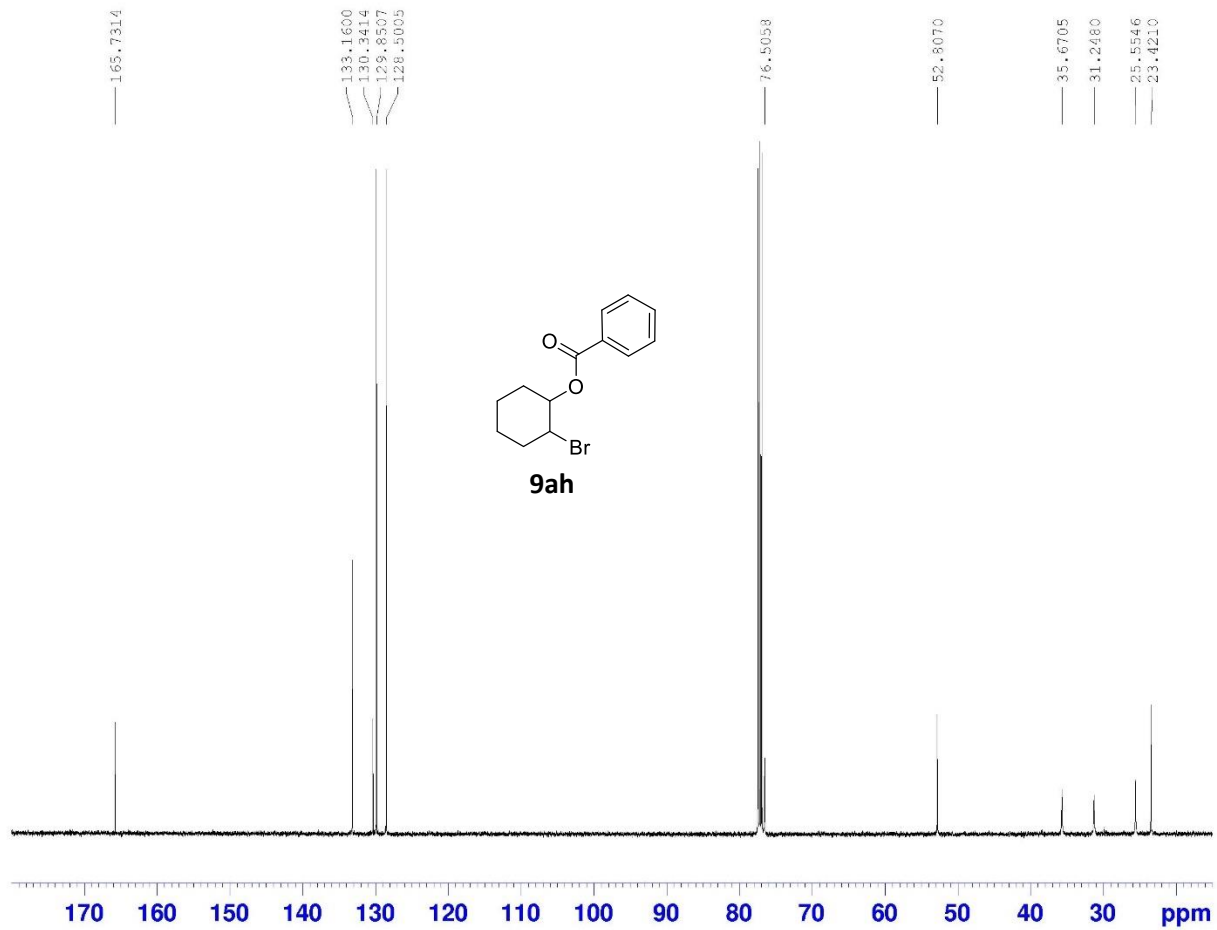

```

Current Data Parameters
NAME          JWC500 data
EXPNO        2
PROCNO       1

F2 - Acquisition Parameters
Data_        20201117
Time_        21.16 h
INSTRUM      spect
PROBHD       5119470_0283
PULPROG      zgpg30
TD           65536
SOLVENT      CDC13
NS           700
DS           4
SWH          23751.904 Hz
FIDRES       0.308261 Hz
AQ           1.1010048 sec
RG           205.72
DW           16.800 usec
DE           6.50 usec
TE           295.1 K
D1           2.0000000 sec
D11          0.0300000 sec
TD0          1
SFO1         125.7703643 MHz
NUC1         13C
P1           9.75 usec
PLW1         94.0000000 W
SFO2         500.1320005 MHz
NUC2         1H
CPDPRG[2]   waltz16
PCPD2       80.00 usec
PLW2         25.0000000 W
PLW12        0.46495000 W
ELW13        0.23387000 W

F2 - Processing parameters
SI           32768
SF           125.7577752 MHz
AQW         0
SSE         0
LA           1.00 Hz
GB           0
PC           1.40

```

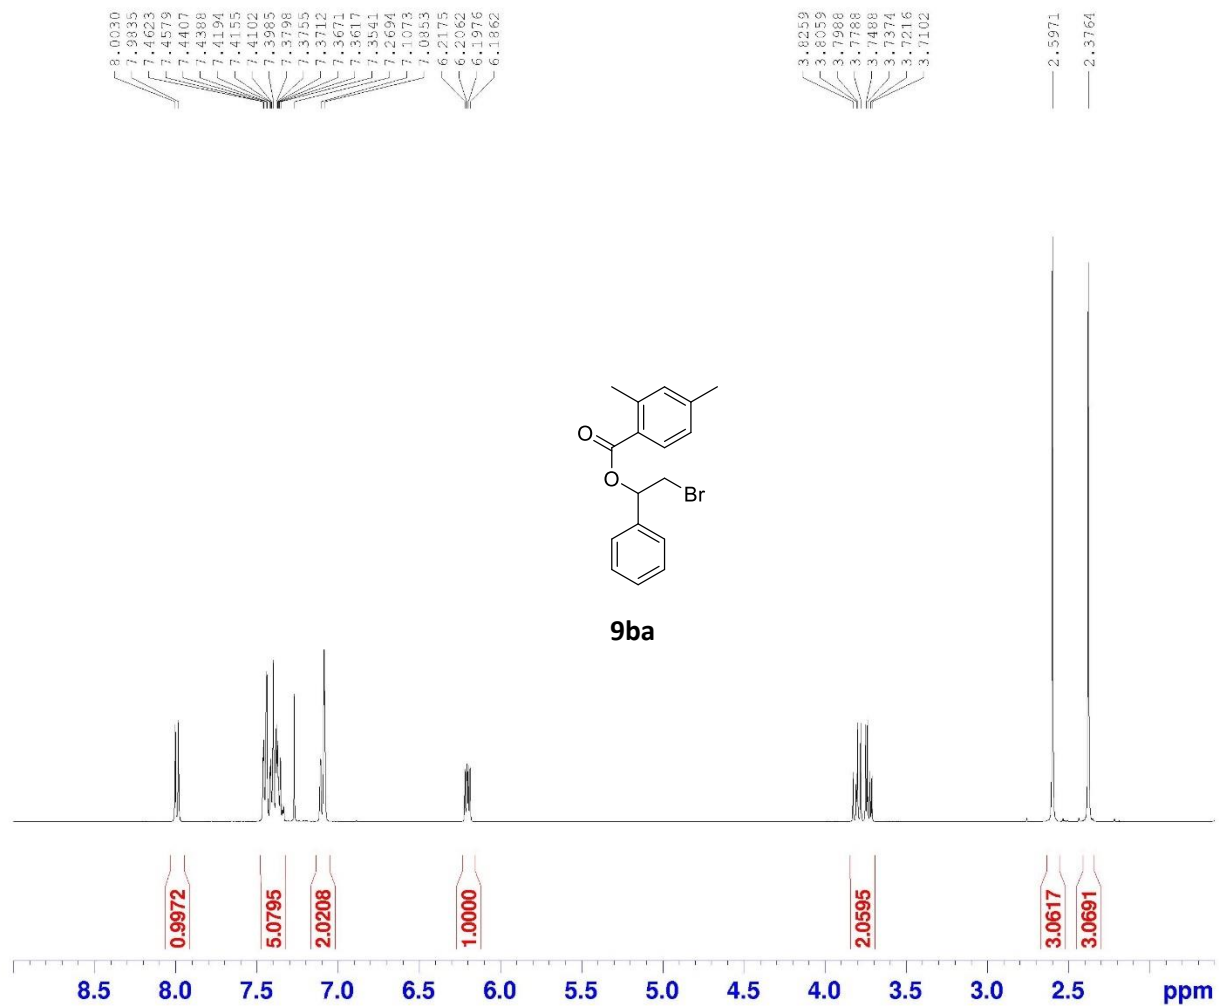

```

Current Data Parameters
NAME          JWC392111p
EXPNO         1
PROCNO        1

F2 - Acquisition Parameters
Data_         20201112
Time_         17.01 h
INSTRUM       spect
PROBHD        %S20201_0170
PULPROG       zg30
TD            65536
SOLVENT       CDCl3
NS            16
DS            2
SWH           8012.820 Hz
FIDRES        0.244832 Hz
AQ            4.0894465 sec
RG            181
DW            62.400 usec
DE            6.50 usec
TE            295.3 K
D1            1.00000000 sec
TD0           1
SFO1          400.1324708 MHz
NUC1          1H
P1            6.75 usec
PLW1          13.17700005 W

F2 - Processing parameters
SI            65536
SF            400.1300060 MHz
WDW           EM
SSB           0
LB            0.30 Hz
GB            0
PC            1.00

```



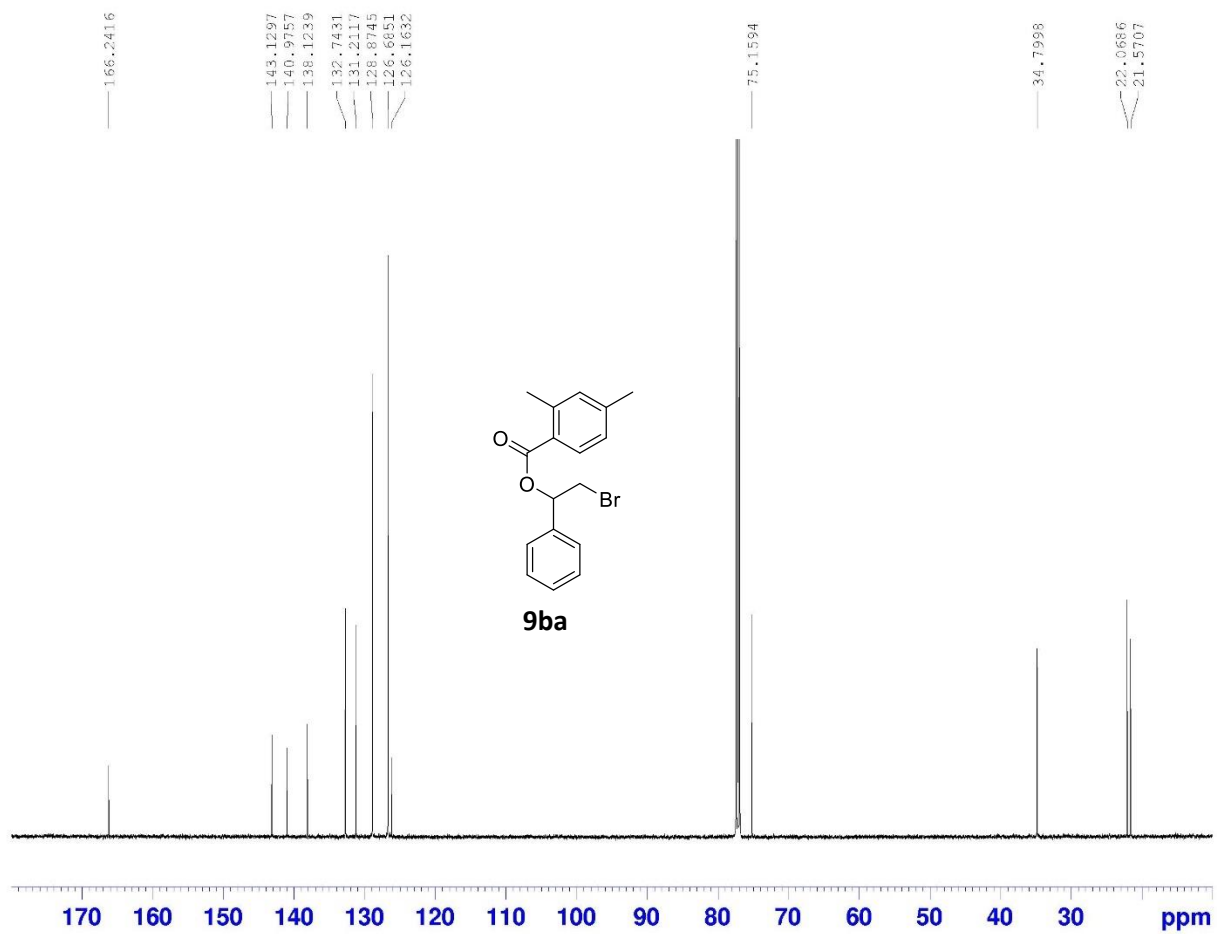

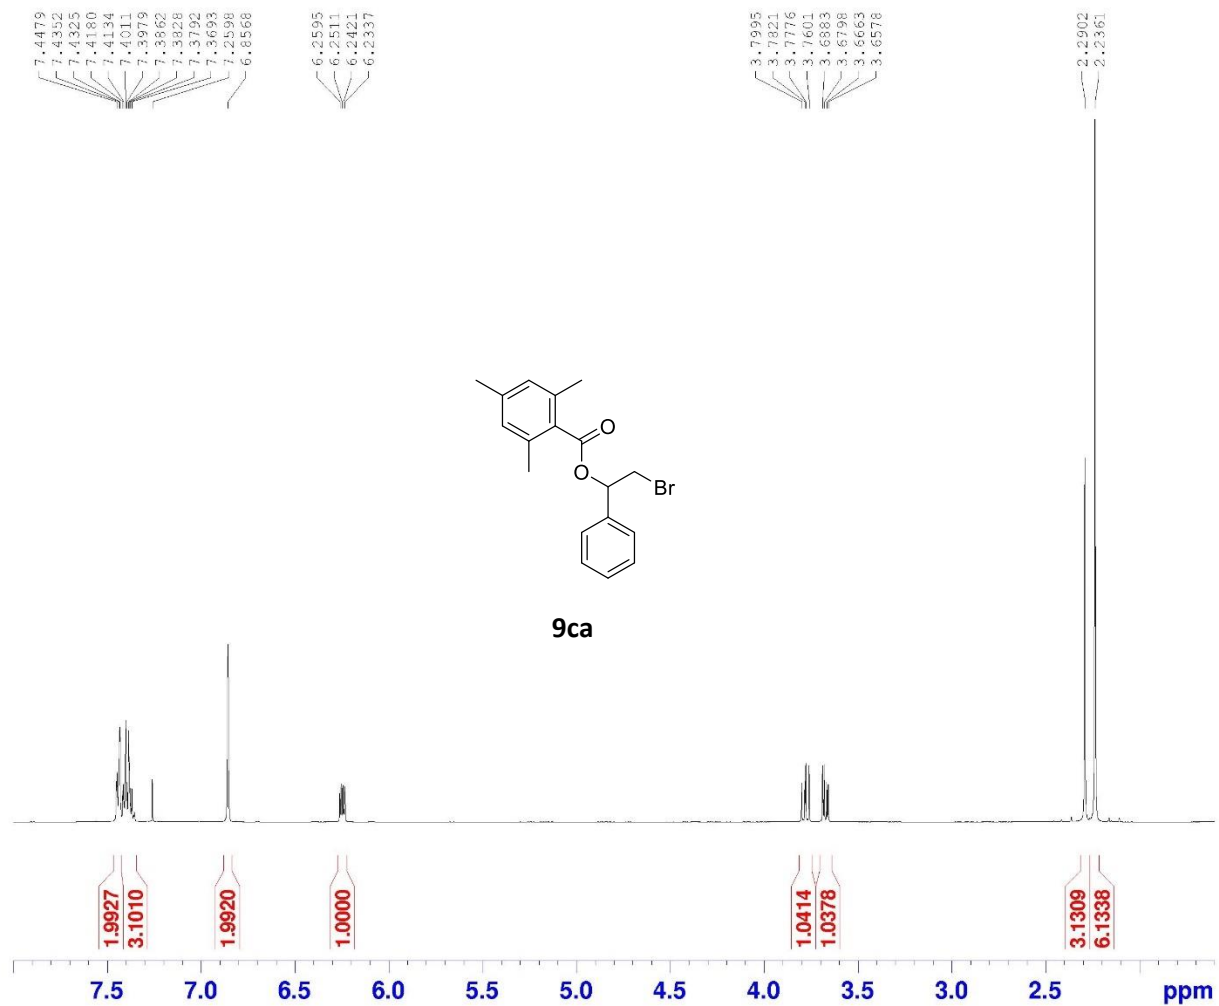

```

Current Data Parameters
NAME          JWC338gm F pl
EXPNO        1
PROCNO       1

F2 - Acquisition Parameters
Data_        20190715
Time_        18.49 h
INSTRUM      spect
PROBHD       Z149001_0010
PULPROG      zg30
TD           65536
SOLVENT      CDCl3
NS           16
DS           2
SWH          10000.000 Hz
FIDRES       0.305176 Hz
AQ           3.2767999 sec
RG           30.85
DW           50.000 usec
DE           10.00 usec
TE           298.0 K
D1           1.00000000 sec
TD0          1
SFO1         500.1330883 MHz
NUC1         1H
P1           11.25 usec
PL1          15.00000000 W

F2 - Processing parameters
SI           65536
SF           500.1300124 MHz
WDW          EM
SSB          0
LB           0.30 Hz
GB           0
PC           1.00

```

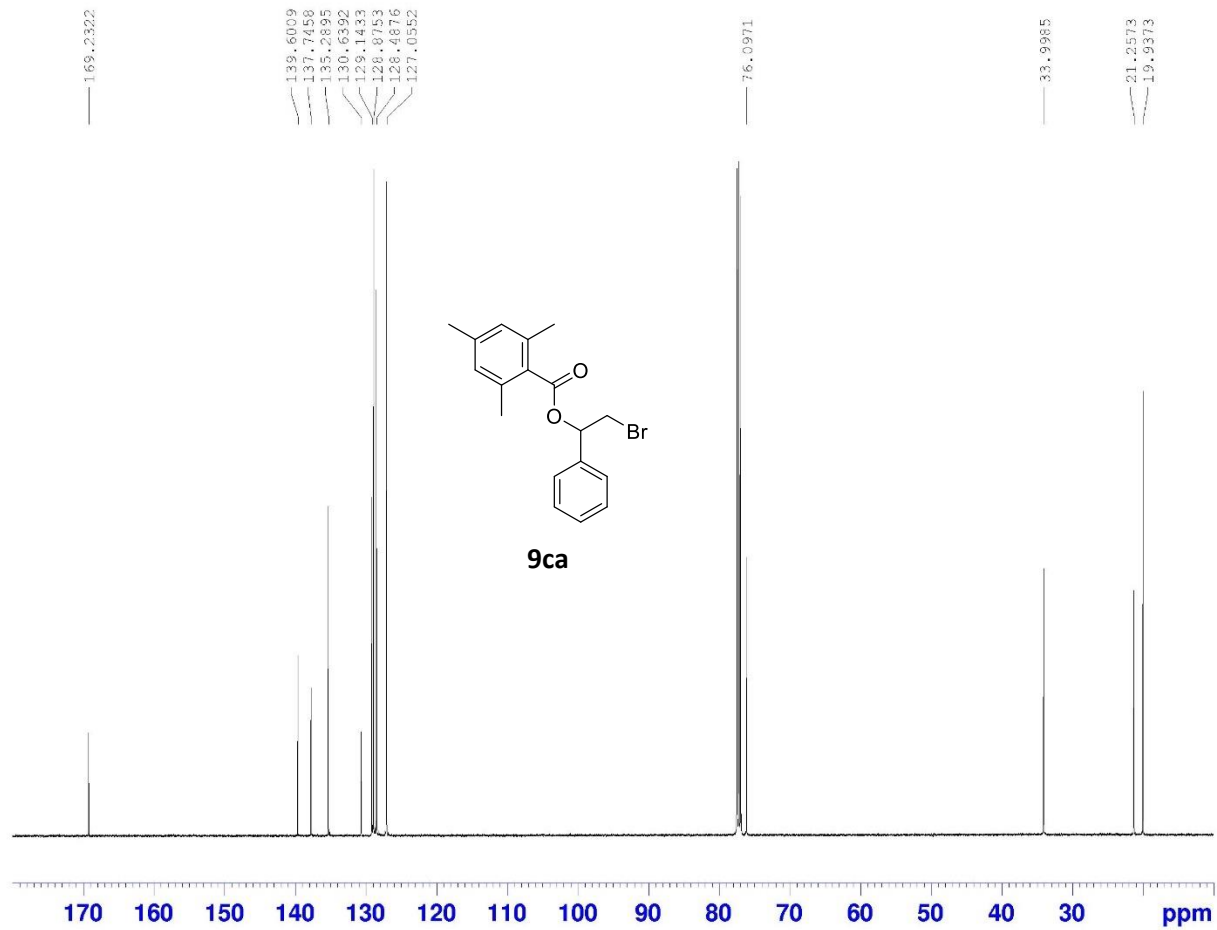

```

Current Data Parameters
NAME          JWC3386m F pl
EXPNO        2
PROCNO       1

F2 - Acquisition Parameters
Data_        20190715
Time_        19.18 h
INSTRUM      spect
PROBHD       Z149001_0010
PULPROG      zgpg30
TD           55536
SOLVENT      CDC13
NS           500
DS           4
SWH          23751.904 Hz
FIDRES       0.308261 Hz
AQ           1.1010048 sec
RG           205.72
DW           16.800 usec
DE           18.00 usec
TE           298.0 K
D1           2.0000000 sec
D11          0.0300000 sec
TD0          1
SFO1         125.7703643 MHz
NUC1         13C
P1           10.00 usec
PLW1         61.0000000 W
SFO2         500.1320005 MHz
NUC2         1H
CPDPRG[2]   waltz16
PCPD2       80.00 usec
PLW2         15.0000000 W
PLW12        0.29663000 W
ELW13        0.14920001 W

F2 - Processing parameters
SI           32768
SF           125.7577761 MHz
AQW          0
SSE          0
LA           1.00 Hz
GB           0
PC           1.40
  
```

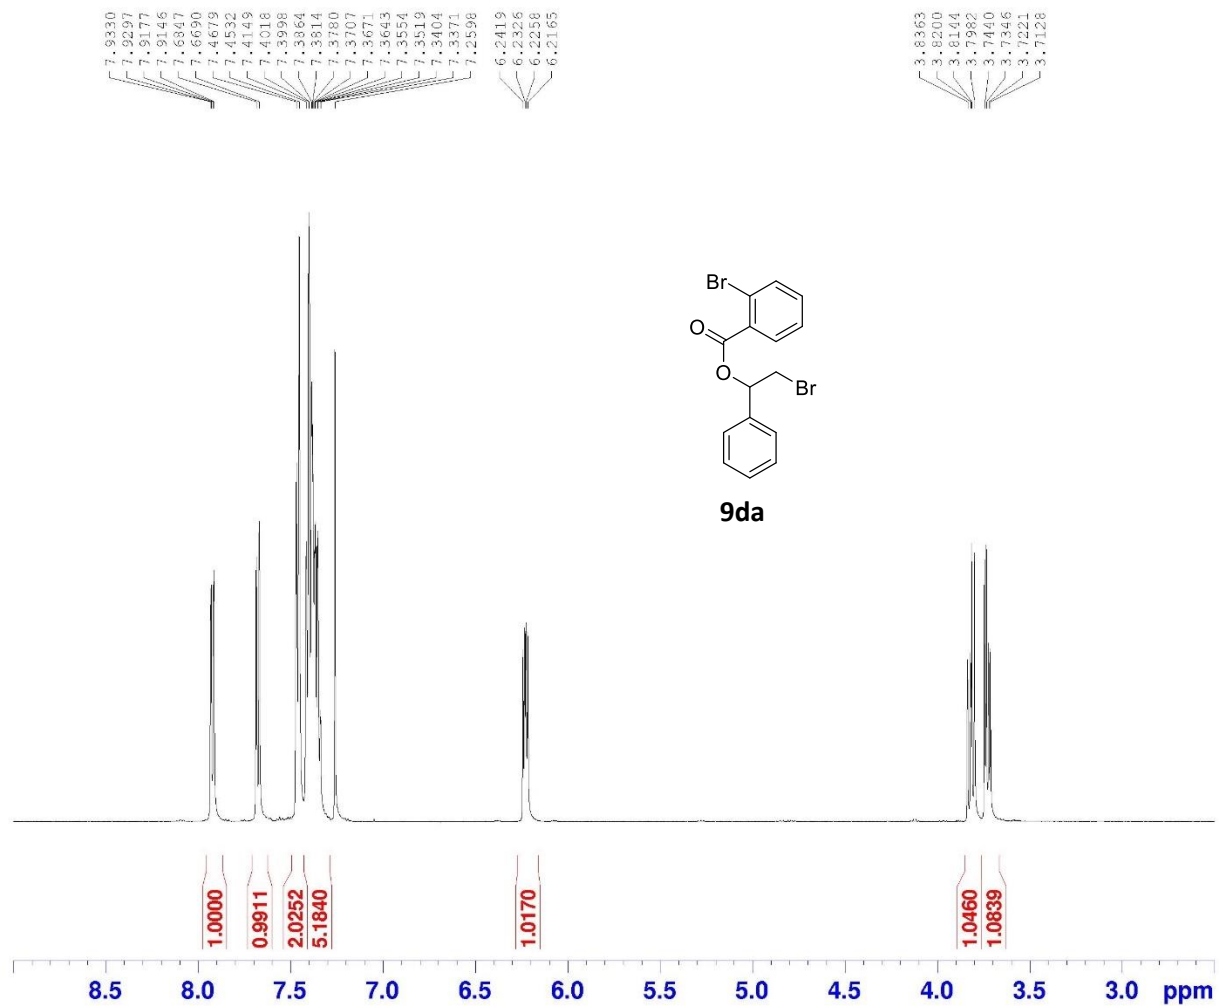

```

Current Data Parameters
NAME          JWC531.p3
EXPNO        1
PROCNO       1

F2 - Acquisition Parameters
Data_        20200727
Time_        18.33 h
INSTRUM      spect
PROBHD       Z119470_0283
PULPROG      zg30
TD           65536
SOLVENT      CDC13
NS           16
DS           2
SWH          10000.000 Hz
FIDRES       0.305176 Hz
AQ           3.2767999 sec
RG           126.88
DW           50.000 usec
DE           6.50 usec
TE           295.1 K
D1           1.00000000 sec
TD0          1
SFO1         500.1330683 MHz
NUC1         1H
P1           10.00 usec
PLW1         25.00000000 W

F2 - Processing parameters
SI           65536
SF           500.1300117 MHz
WDW          EM
SSB          0
LB           0.30 Hz
GB           0
PC           1.00

```

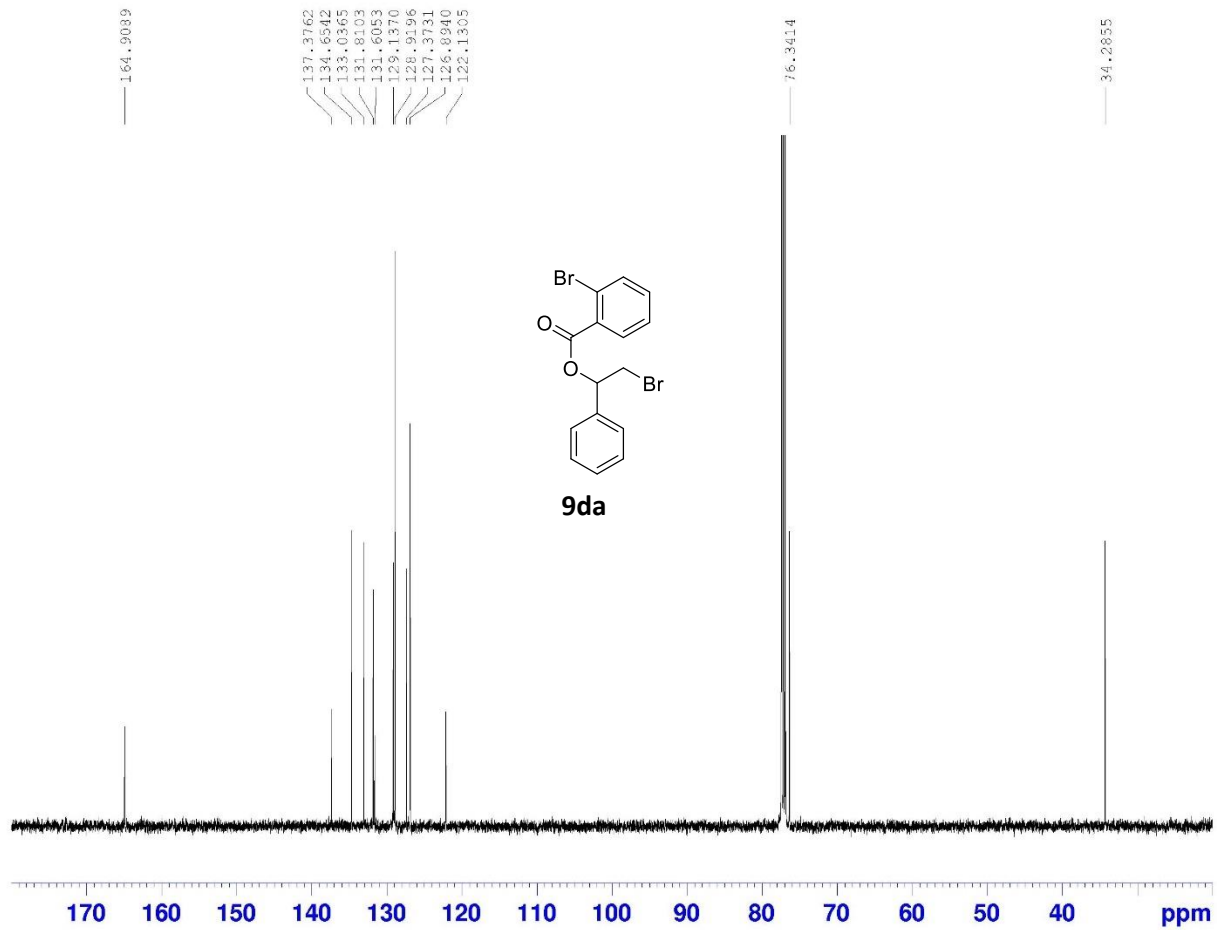

```

Current Data Parameters
NAME          JWC531 p3
EXPNO        2
PROCNO       1

F2 - Acquisition Parameters
Data_        20200727
Time_        19.01 h
INSTRUM      spect
PROBHD       W119470_0283
PULPROG      zgpg30
TD           55536
SOLVENT      CDCl3
NS           400
DS           4
SWH          23751.904 Hz
FIDRES       0.308261 Hz
AQ           1.1010048 sec
RG           205.72
DW           16.800 usec
DE           6.50 usec
TE           295.1 K
D1           2.00000000 sec
D11          0.03000000 sec
TD0          1
SFO1         125.7703643 MHz
NUC1         13C
P1           9.75 usec
PLW1         94.00000000 W
SFO2         500.1320005 MHz
NUC2         1H
CFDPRG[2]    waltz16
PCPD2        80.00 usec
PLW2         25.00000000 W
PLW12        0.39063001 W
ELW13        0.19548001 W

F2 - Processing parameters
SI           32768
SF           125.7577742 MHz
AQW          0
SSE          0
LA           1.00 Hz
GB           0
PC           1.40

```

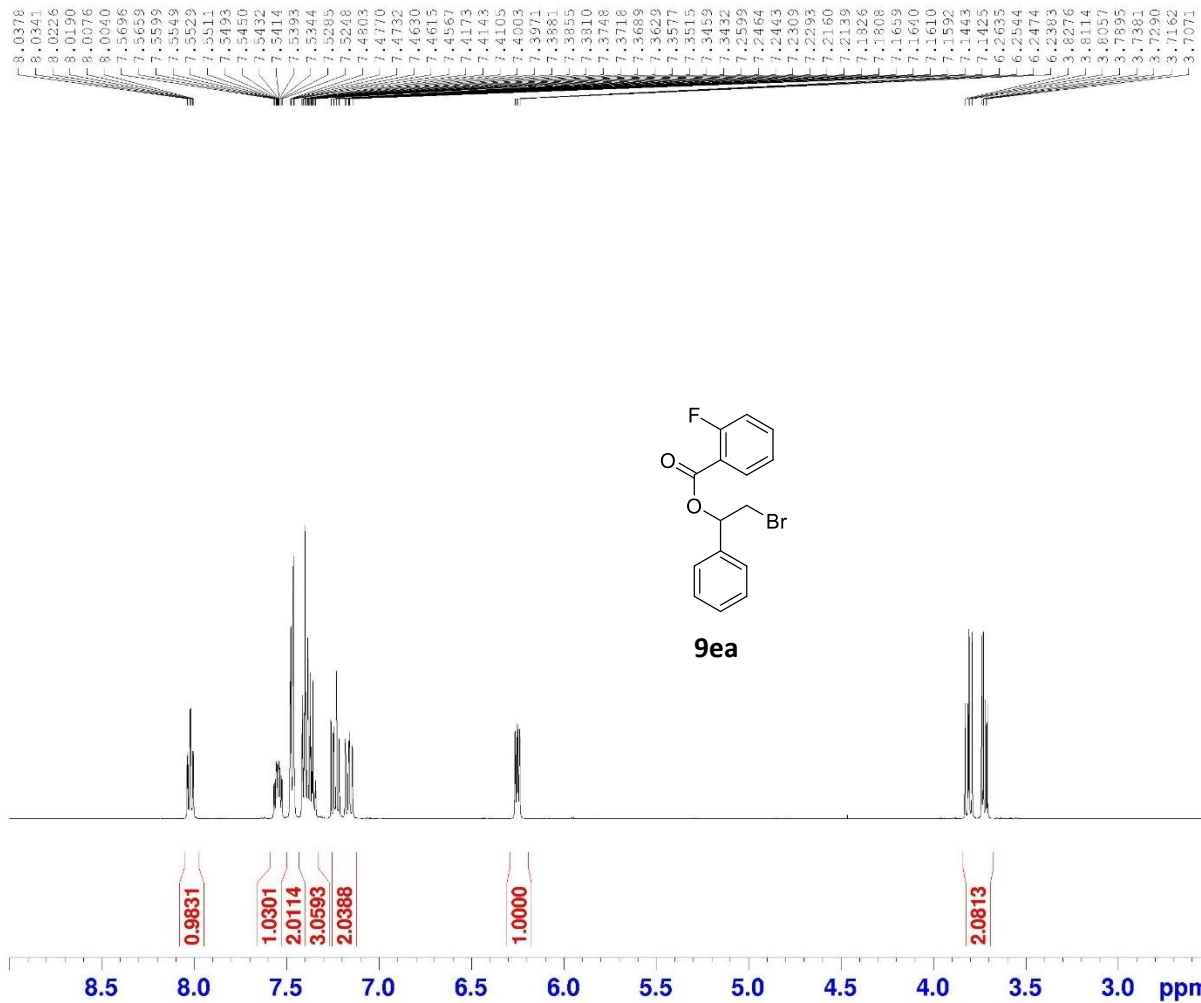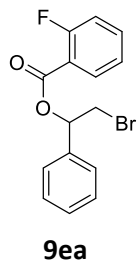

Current Data Parameters  
NAME 3WC389pm pIII pure  
EXPNO 1  
PROCNO 1

F2 - Acquisition Parameters  
Date\_ 20190625  
Time 21.37 h  
INSTRUM spect  
PROBHD 5149001\_0010  
PULPROG zg30  
TD 65536  
SOLVENT CDCl3  
NS 16  
DS 2  
SWH 10000.000 Hz  
FIDRES 0.305176 Hz  
AQ 3.2767999 sec  
RG 30.85  
DW 50.000 usec  
DE 10.00 usec  
TE 298.0 K  
D1 1.00000000 sec  
TDO 1  
SFO1 500.1330883 MHz  
NUC1 1H  
P1 11.25 usec  
PLW1 15.00000000 W

F2 - Processing parameters  
SI 65536  
SF 500.1300122 MHz  
WDW EM  
SSB 0  
LB 0.30 Hz  
GB 0  
PC 1.00

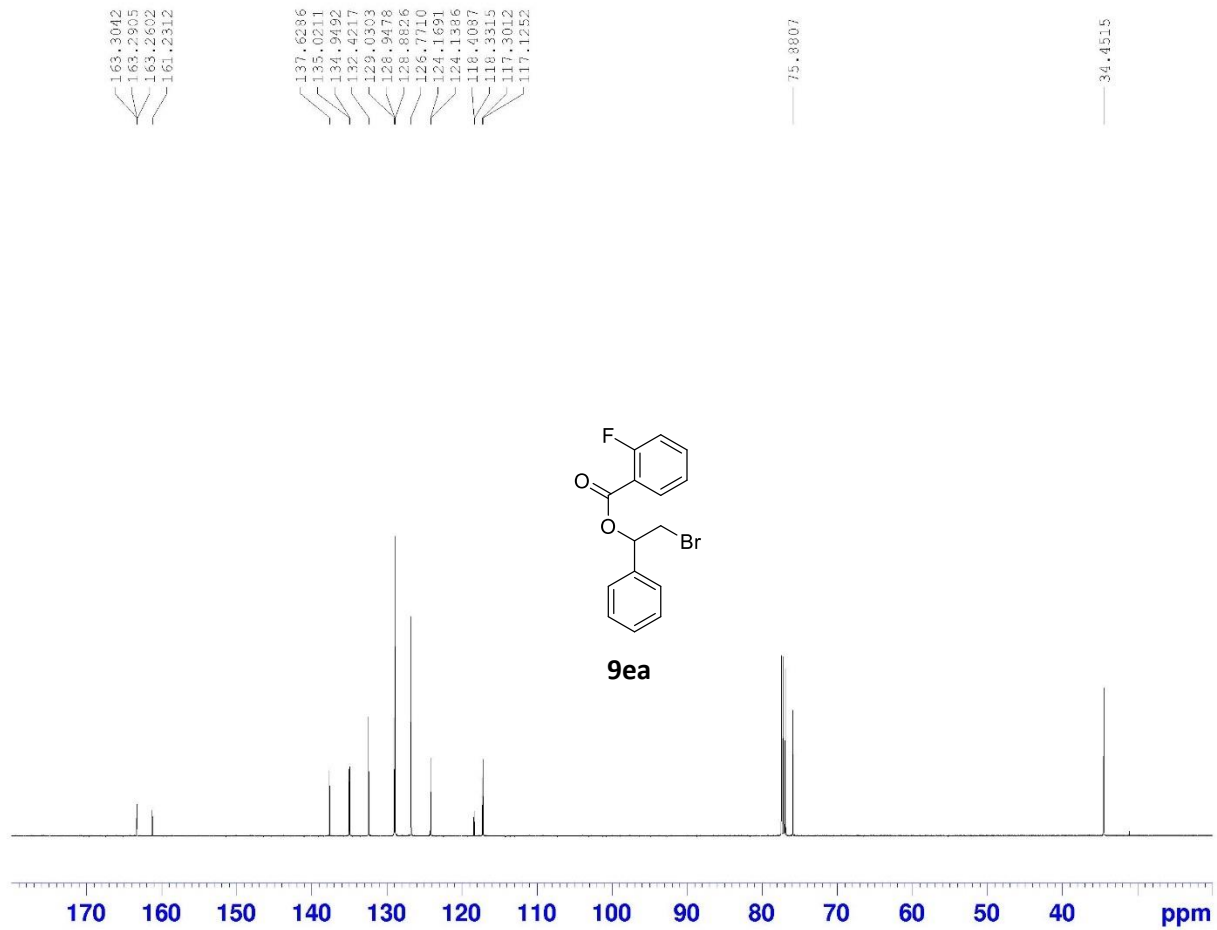

Current Data Parameters  
 NAME JWC389pm p111 pure  
 EXPNO 2  
 PROCNO 1

F2 - Acquisition Parameters  
 Date\_ 20190625  
 Time\_ 21.53 h  
 INSTRUM spect  
 PROBRD M149001\_0010  
 PULPROG zgpg30  
 TD 55536  
 SOLVENT CDC13  
 NS 300  
 DS 4  
 SWH 23751.904 Hz  
 FIDRES 0.308261 Hz  
 AQ 1.1010048 sec  
 RG 205.72  
 DW 16.800 usec  
 DE 18.00 usec  
 TK 298.0 K  
 D1 2.0000000 sec  
 D11 0.0300000 sec  
 TD0 1  
 SFO1 125.7703643 MHz  
 NUC1 13C  
 P1 10.00 usec  
 PLW1 61.0000000 W  
 SFO2 500.1320005 MHz  
 NUC2 1H  
 CDPORG[2] waltz16  
 PCPD2 80.00 usec  
 PLW2 15.0000000 W  
 PLW12 0.29663000 W  
 PLW13 0.14920001 W

F2 - Processing parameters  
 SI 32768  
 SF 125.7577779 MHz  
 MDW BM  
 SSE 0  
 LA 1.00 Hz  
 GB 0  
 PC 1.40

8.3260  
8.3218  
8.3125  
8.3080  
8.3049  
8.2917  
8.2866  
8.2840  
8.2748  
8.2705  
7.4559  
7.4421  
7.4478  
7.4389  
7.4364  
7.4292  
7.4258  
7.4215  
7.4127  
7.4051  
7.4010  
7.3967  
7.3918  
7.3883  
7.3848  
7.3784  
7.2598  
6.2479  
6.2393  
6.2310  
6.2225

3.8562  
3.8393  
3.8340  
3.8171  
3.7632  
3.7546  
3.7410  
3.7324

```

Current Data Parameters
NAME      JWC379pm pure X
EXPNO    1
PROCNO   1

F2 - Acquisition Parameters
Data_    20190625
Time     17.33 h
INSTRUM  spect
PROBHD   Z149001_0010
PULPROG  zg30
TD        65536
SOLVENT  CDCl3
NS        16
DS        2
SWH       10000.000 Hz
FIDRES    0.305176 Hz
AQ        3.2767999 sec
RG        30.85
DW        50.000 usec
DE        10.00 usec
TE        298.0 K
D1        1.00000000 sec
TDO       1
SFO1     500.1330883 MHz
NUC1      1H
P1        11.25 usec
PLW1     15.00000000 W

F2 - Processing parameters
SI        65536
SF        500.1300125 MHz
WDW       EM
SSB       0
LB        0.30 Hz
GB        0
PC        1.00

```

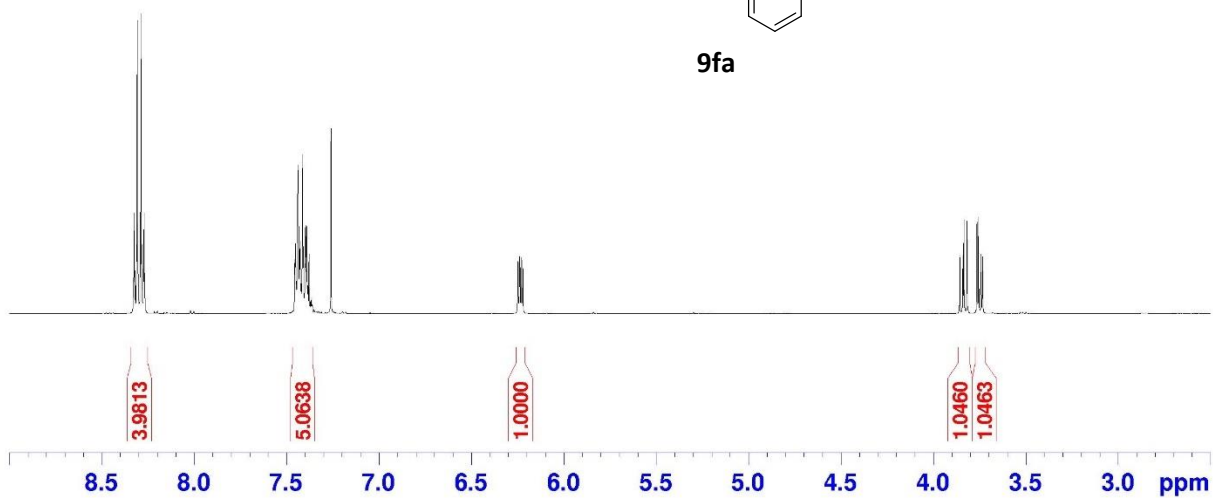



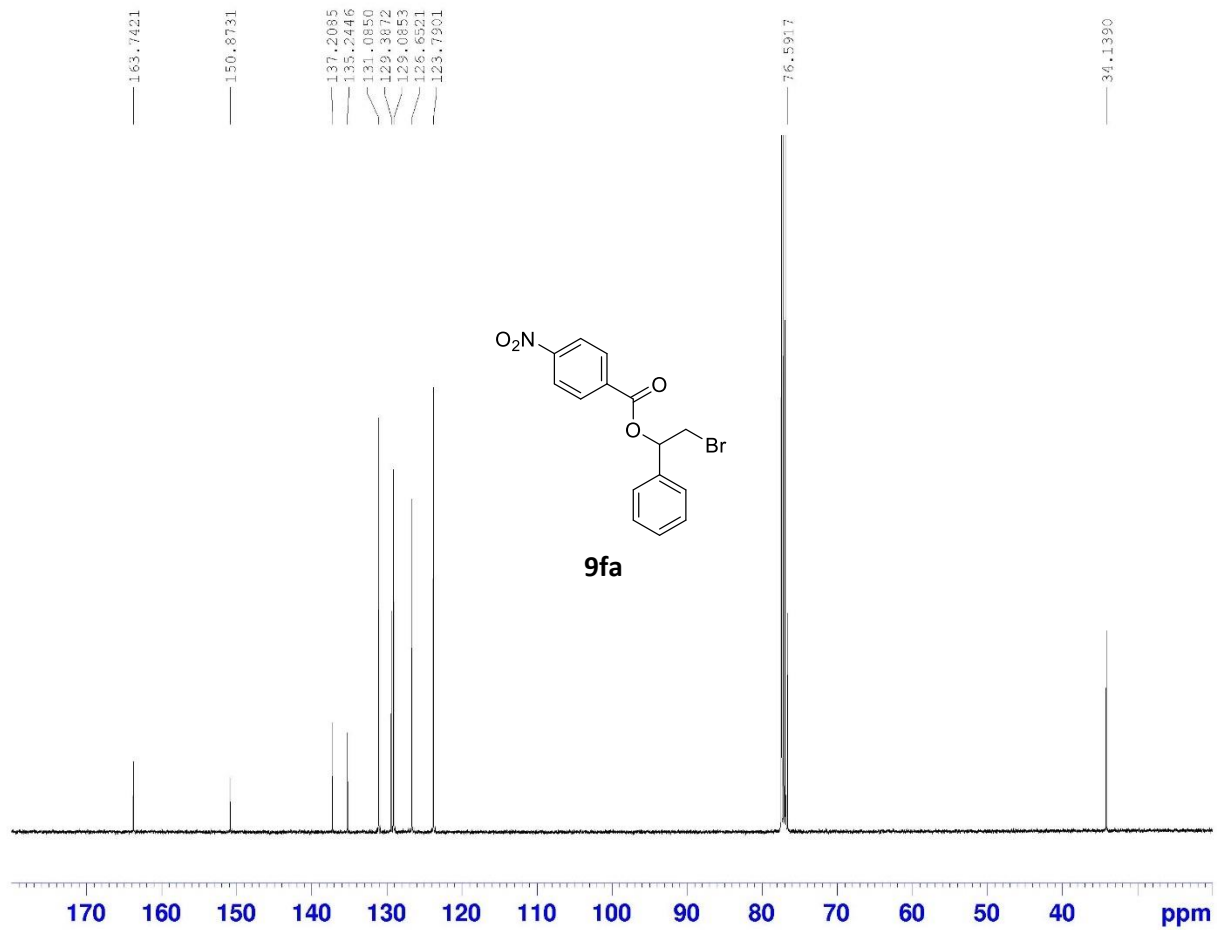

```

Current Data Parameters
NAME      JWC379pm pure X
EXPNO    2
PROCNO   1

F2 - Acquisition Parameters
Data_    20190625
Time     17.49 h
INSTRUM  spect
PROBHD   Z149001_0010
PULPROG  zgpg30
TD       55536
SOLVENT  CDCl3
NS       300
DS       4
SWH      23751.904 Hz
FIDRES   0.308261 Hz
AQ       1.1010048 sec
RG       205.72
DW       16.800 usec
DE       18.00 usec
TE       298.0 K
D1       2.0000000 sec
D11      0.0300000 sec
TD0      1
SFO1     125.7703643 MHz
NUC1     13C
P1       10.00 usec
PLW1     61.0000000 W
SFO2     500.1320005 MHz
NUC2     1H
CPDPRG2  waltz16
PCPD2    80.00 usec
PLW2     15.0000000 W
PLW12    0.29663000 W
ELW13    0.14920001 W

F2 - Processing parameters
SI       32768
SF       125.7577736 MHz
NUW      BM
SSE      0
LA       1.00 Hz
GB       0
PC       1.40

```

7.3897  
7.3826  
7.3752  
7.3712  
7.3633  
7.3384  
7.3341  
7.3222  
7.3198  
7.3044  
7.2898  
7.2463  
7.2317  
7.2294  
7.2151

6.0385  
6.0292  
6.0222  
6.0129

3.6711  
3.6547  
3.6493  
3.6330  
3.6086  
3.5993  
3.5849  
3.5776  
3.0367  
3.0308  
3.0198  
3.0158  
3.0045  
3.0007  
2.8278  
2.8122  
2.7961  
2.7802  
2.7659  
2.7530  
2.7399  
2.7356  
2.7210  
2.7184  
2.7038

Current Data Parameters  
NAME JWC398 gm B pure  
EXPNO 2  
PROCNO 1

F2 - Acquisition Parameters  
Date\_ 20190710  
Time 21.41 h  
INSTRUM spect  
PROBHD Z149001\_0010  
EULPROG zg30  
TD 65536  
SOLVENT CDC13  
NS 16  
DS 2  
SWH 10000.000 Hz  
FIDRES 0.305176 Hz  
AQ 3.2767999 sec  
RG 17.56  
DW 50.000 usec  
DE 10.00 usec  
TE 298.0 K  
D1 1.00000000 sec  
TD0 1  
SFO1 500.1330883 MHz  
NUC1 1H  
P1 11.25 usec  
PLW1 15.00000000 W

F2 - Processing parameters  
SI 65536  
SF 500.1300123 MHz  
WDW EM  
SSB 0  
LB 0.30 Hz  
GB 0  
PC 1.00

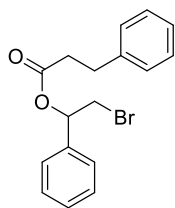

9ga

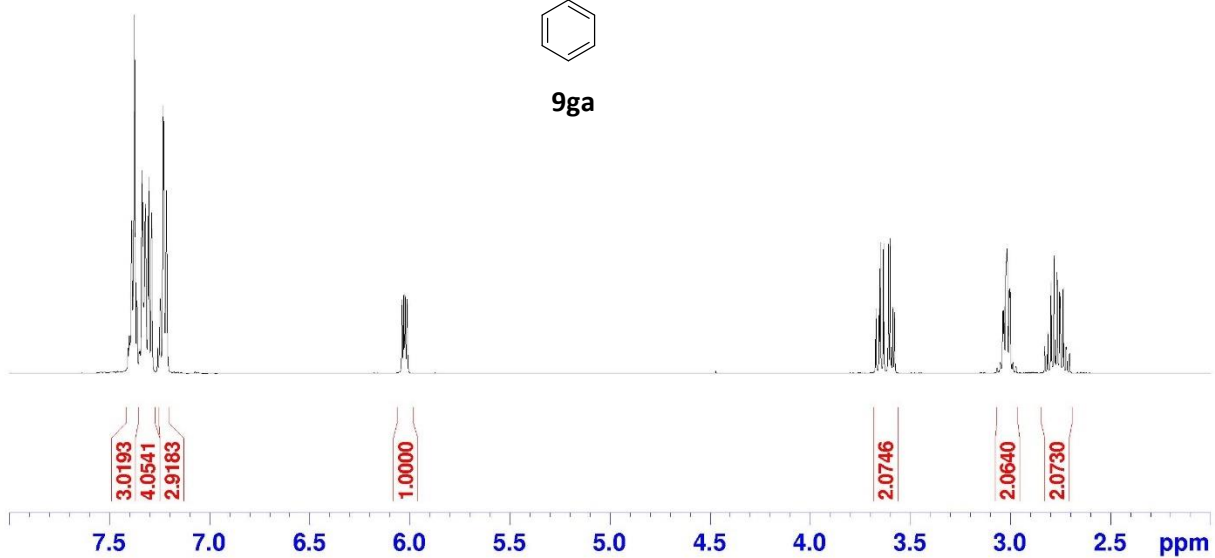

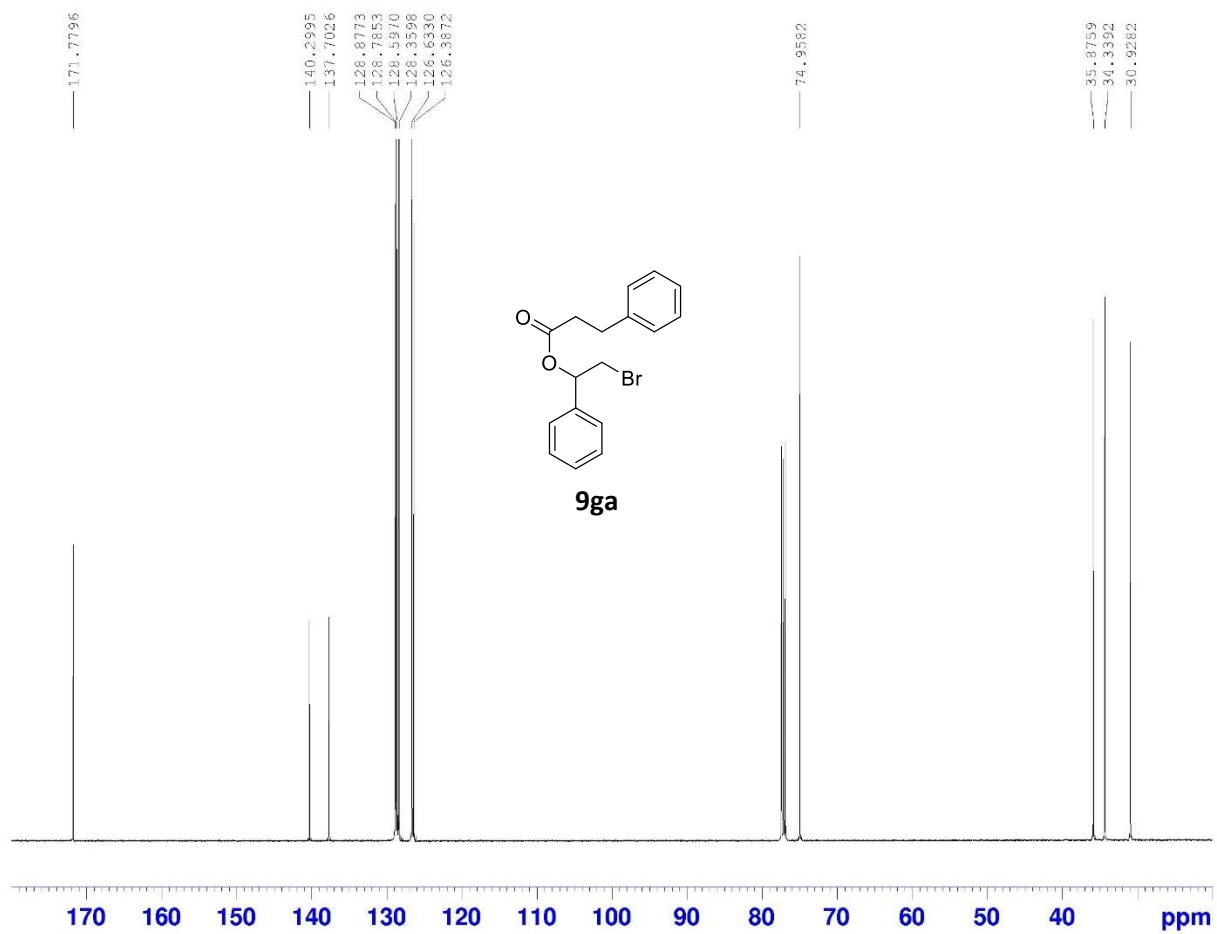

```

Current Data Parameters
NAME      JWC398 gm E pure
EXPNO    3
PROCNO   1

F2 - Acquisition Parameters
Data_    20190710
Time     21.34 h
INSTRUM  spect
PROBHD   Z149001_0010
PULPROG  zgpg30
TD       55336
SOLVENT  CDCl3
NS       500
DS       4
SWH      23761.904 Hz
FIDRES   0.308261 Hz
AQ       1.1010048 sec
RG       205.72
DW       16.800 usec
DE       18.00 usec
TE       298.0 K
D1       2.0000000 sec
D11      0.0300000 sec
TD0      1
SFO1     125.7703643 MHz
NUC1     13C
P1       10.00 usec
PLW1     61.0000000 W
SFO2     500.1320005 MHz
NUC2     1H
CFDRPG[2] waltz16
PCPD2    80.00 usec
PLW2     15.0000000 W
PLW12    0.29663000 W
ELW13    0.14920001 W

F2 - Processing parameters
SI       32768
SF       125.7577866 MHz
AQW      BM
SSE      0
LA       1.00 Hz
GB       0
PC       1.40

```

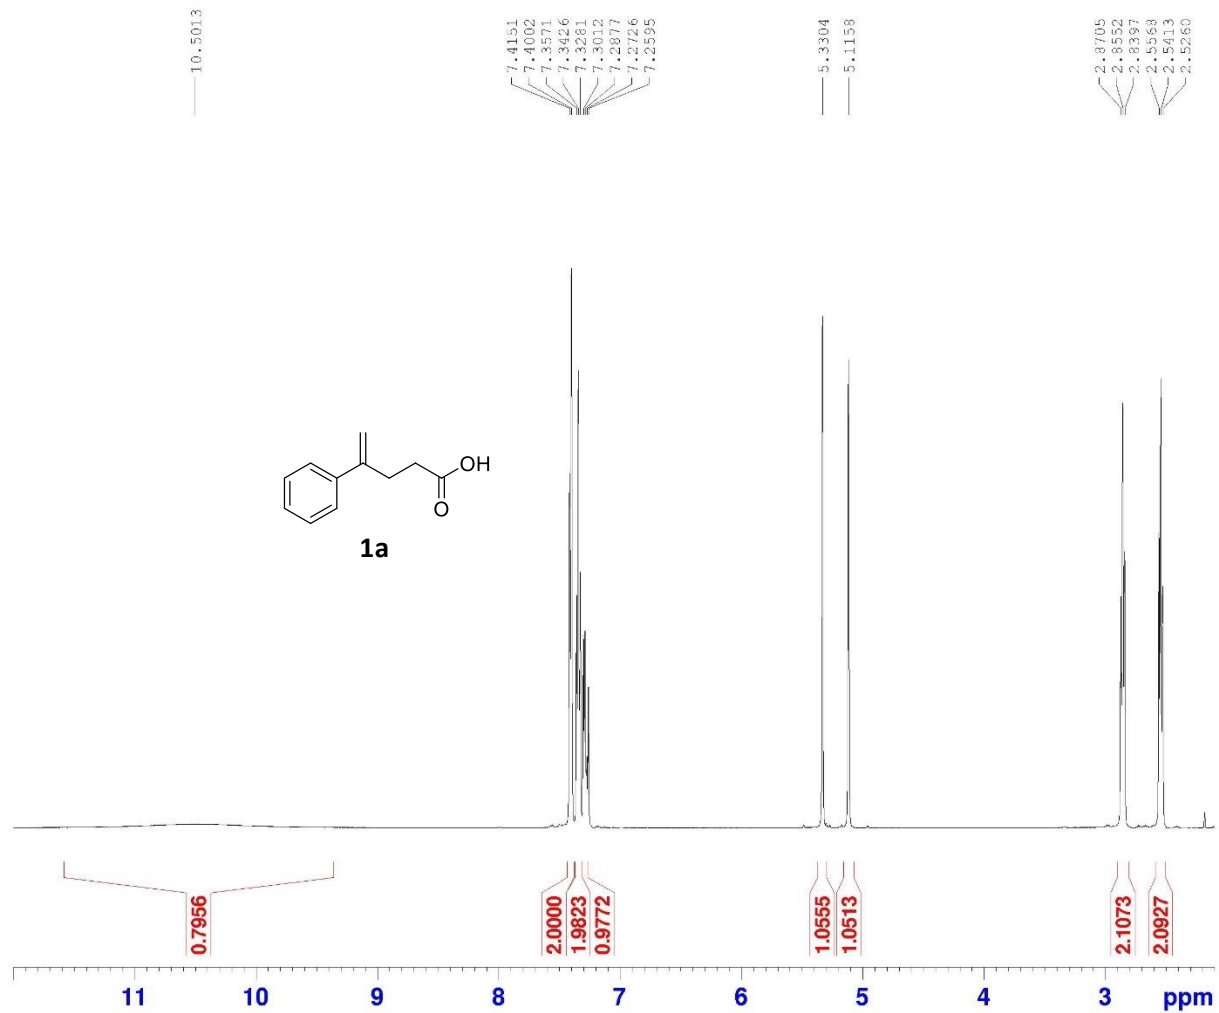

Current Data Parameters  
 NAME JW318 recryst data  
 EXPNO 1  
 PROCNO 1

F2 - Acquisition Parameters  
 Date\_ 20201215  
 Time\_ 21.15 h  
 INSTRUM spect  
 PROBRD M119470\_0283  
 EULPROG zg30  
 TD 65536  
 SOLVENT CDCl3  
 NS 16  
 DS 2  
 SWH 10000.000 Hz  
 FIDRES 0.305176 Hz  
 AQ 3.2767999 sec  
 RG 93.28  
 DW 50.000 usec  
 DE 6.50 usec  
 TK 295.2 K  
 D1 1.00000000 sec  
 TDO 1  
 SFO1 500.1330683 MHz  
 NUC1 1H  
 P1 10.91 usec  
 PLW1 25.00000000 W

F2 - Processing parameters  
 SZ 65536  
 SF 500.1300125 MHz  
 WDW EM  
 SSB 0  
 LB 0.30 Hz  
 GB 0  
 PC 1.00

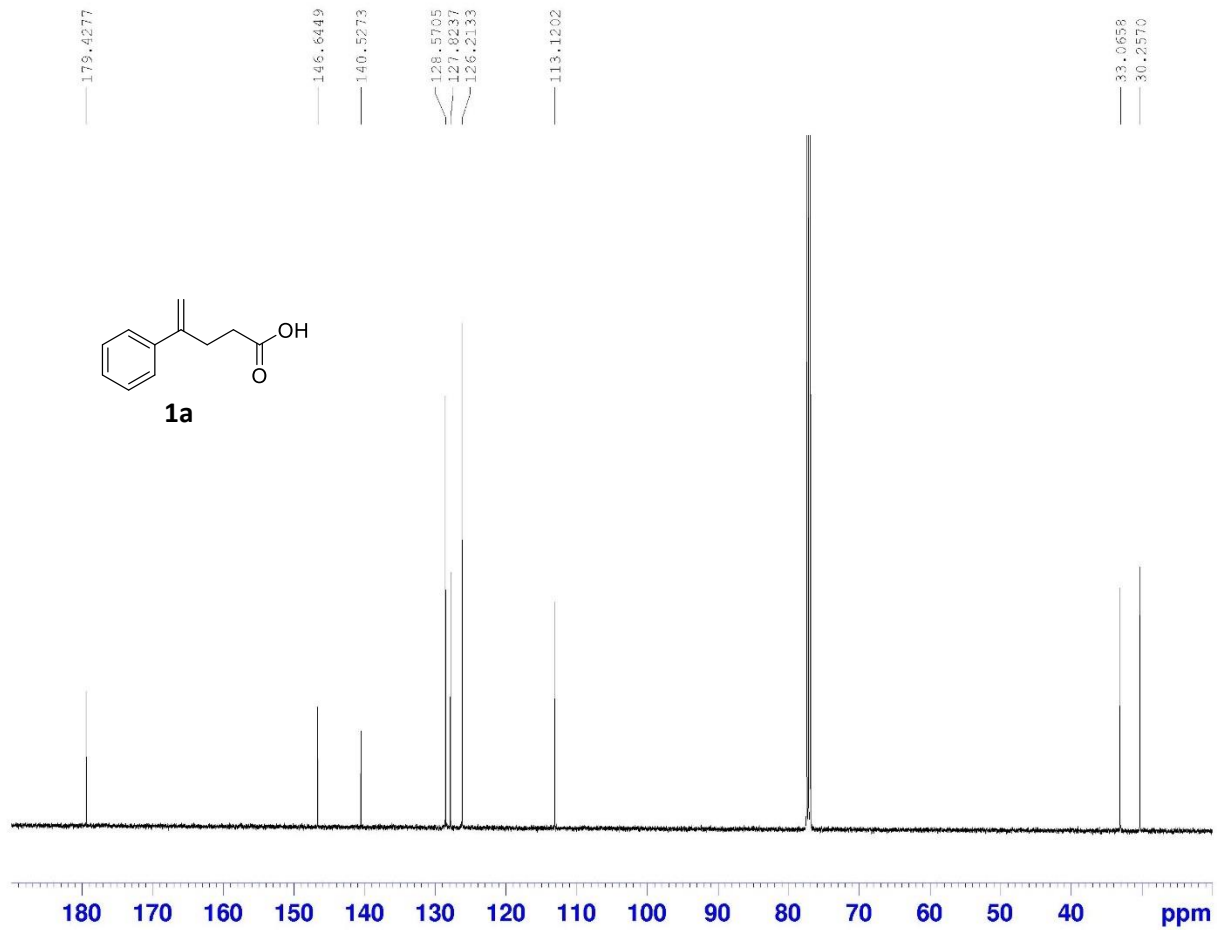

Current Data Parameters  
 NAME JW318 recryst data  
 EXPNO 2  
 PROCNO 1

F2 - Acquisition Parameters  
 Date\_ 20201215  
 Time 21.52 h  
 INSTRUM spect  
 PROBRD M119470\_0283  
 EULPROG zgpg30  
 TD 55336  
 SOLVENT CDC13  
 NS 700  
 DS 4  
 SWH 23761.904 Hz  
 FIDRES 0.308261 Hz  
 AQ 1.1010048 sec  
 RG 206.72  
 DW 16.800 usec  
 DE 6.50 usec  
 TE 295.1 K  
 D1 2.0000000 sec  
 D11 0.0300000 sec  
 TD0 1  
 SFO1 125.7703643 MHz  
 NUC1 13C  
 P1 9.75 usec  
 PLW1 94.0000000 W  
 SFO2 500.1320005 MHz  
 NUC2 1H  
 CDPFG[2] waltz16  
 PCPD2 80.00 usec  
 PLW2 25.0000000 W  
 PLW12 0.46495000 W  
 PLW13 0.23387000 W

F2 - Processing parameters  
 SI 32768  
 SF 125.7577740 MHz  
 NUW 6M  
 SSB 0  
 LA 1.00 Hz  
 GB 0  
 PC 1.40

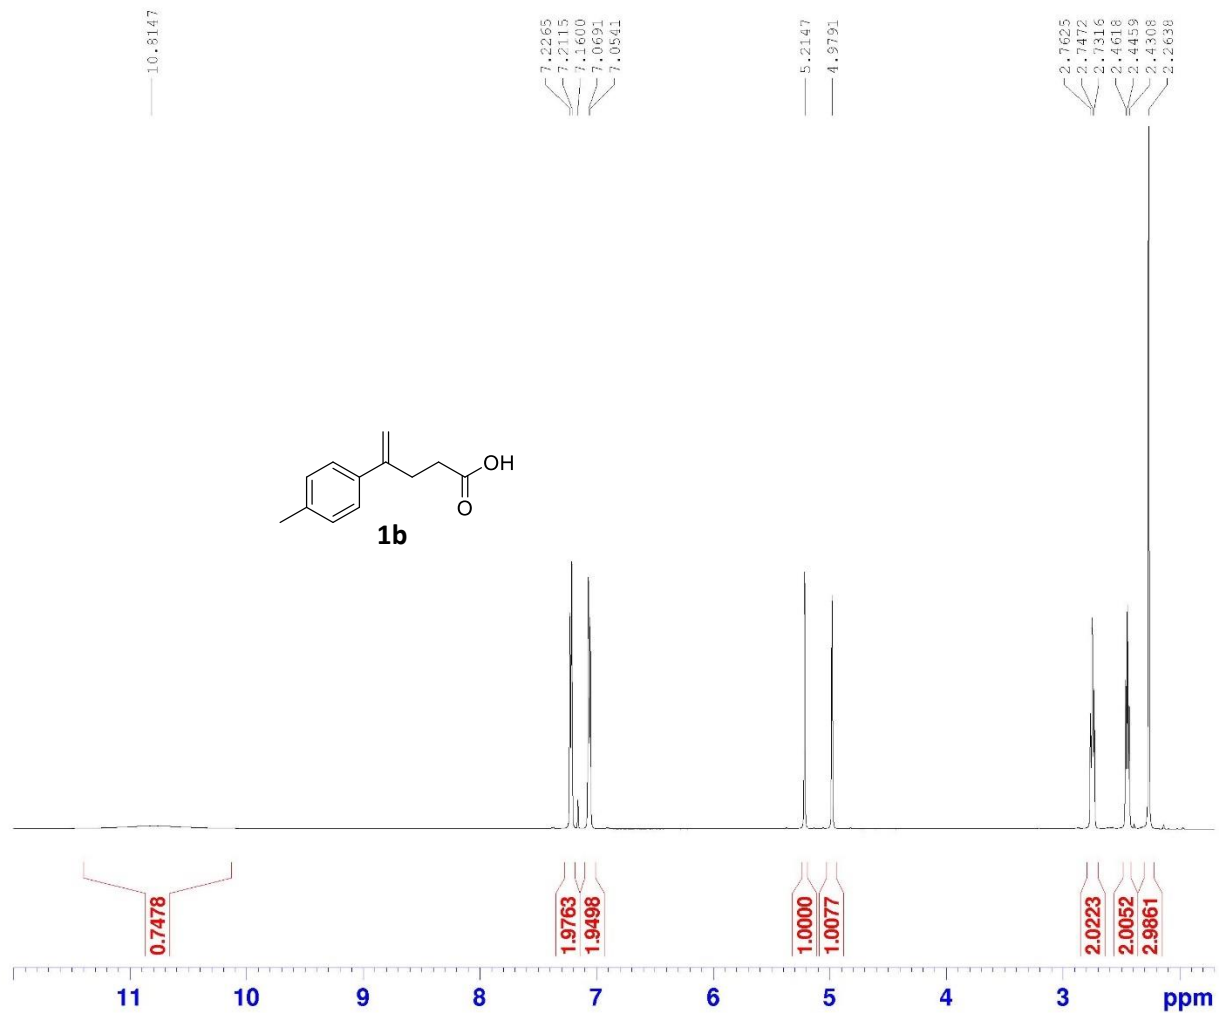

```

Current Data Parameters
NAME      JW344 data
EXPNO    1
PROCNO   1

F2 - Acquisition Parameters
Date_    20201210
Time     23.37 h
INSTRUM  spect
PROBHD   ZH19470_0283
PULPROG  zg30
TD        65536
SOLVENT  CDCl3
NS        16
DS        2
SWH       10000.000 Hz
FIDRES    0.305176 Hz
AQ        3.2767999 sec
RG        50.6
DW        50.000 usec
DE        6.50 usec
TE        295.2 K
D1        1.00000000 sec
TDO       1
SFO1     500.1330683 MHz
NUC1      1H
P1        10.91 usec
PLW1     25.00000000 W

F2 - Processing parameters
SI        65536
SF        500.1300625 MHz
WDW       EM
SSB       0
LB        0.30 Hz
GB        0
PC        1.00
  
```

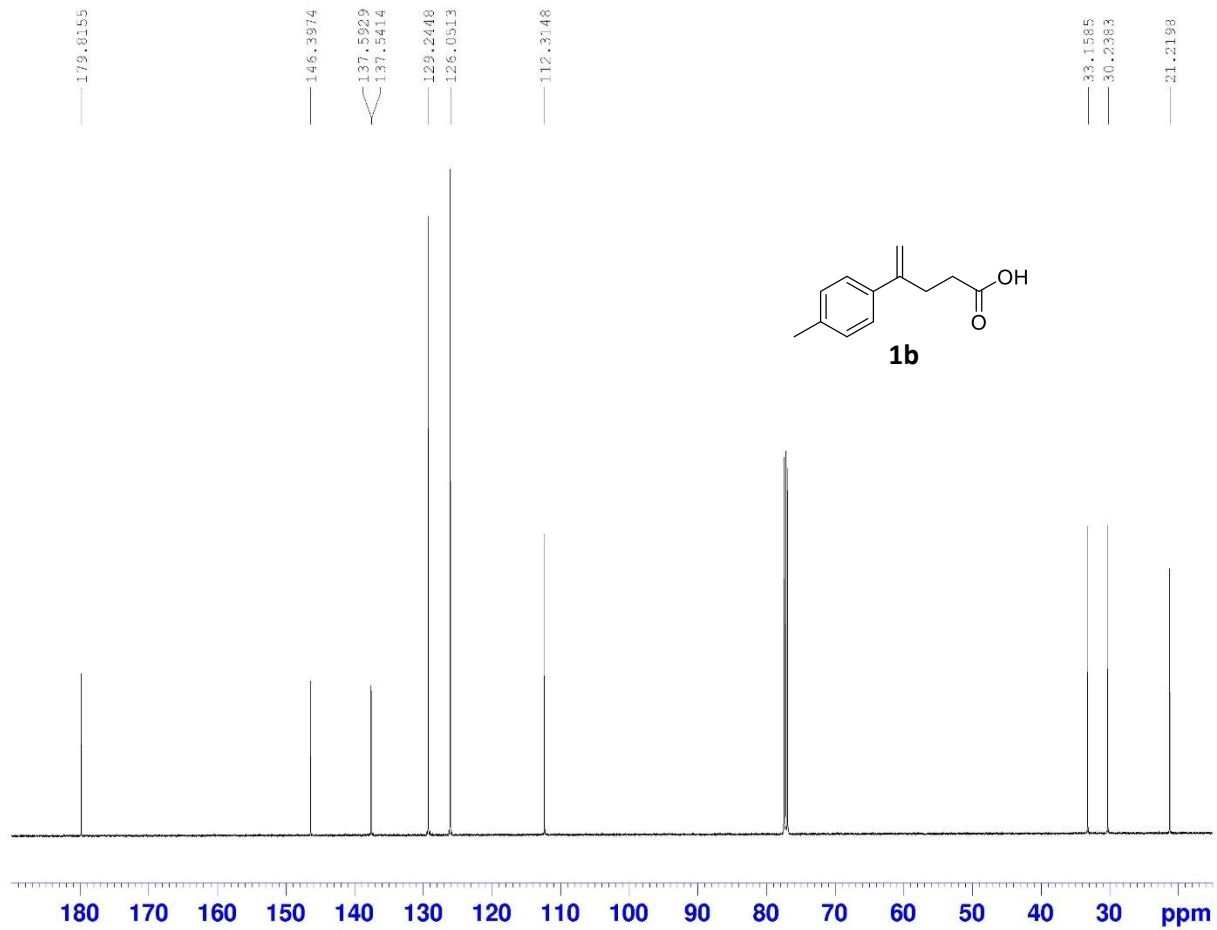

```

Current Data Parameters
NAME      JW344 data
EXPNO    2
PROCNO   1

F2 - Acquisition Parameters
Date_    20201211
Time     2.31 h
INSTRUM  spect
PROBHD   5119470_0283
PULPROG  zgpg30
TD       55536
SOLVENT  cdcl3
NS       1024
DS       4
SWH      23751.904 Hz
FIDRES   0.308261 Hz
AQ       1.1010048 sec
RG       205.72
DW       16.800 usec
DE       6.50 usec
TE       295.2 K
D1       2.0000000 sec
D11      0.0300000 sec
TD0      1
SFO1     125.7703643 MHz
NUC1     13C
P1       9.75 usec
PLW1     94.0000000 W
SFO2     500.1320005 MHz
NUC2     1H
CPDPRG2  waltz16
PCPD2    80.00 usec
PLW2     25.0000000 W
PLW12    0.46495000 W
ELW13    0.23387000 W

F2 - Processing parameters
SI       32768
SF       125.7577771 MHz
AQW      BM
SSE      0
LA       1.00 Hz
GB       0
PC       1.40

```

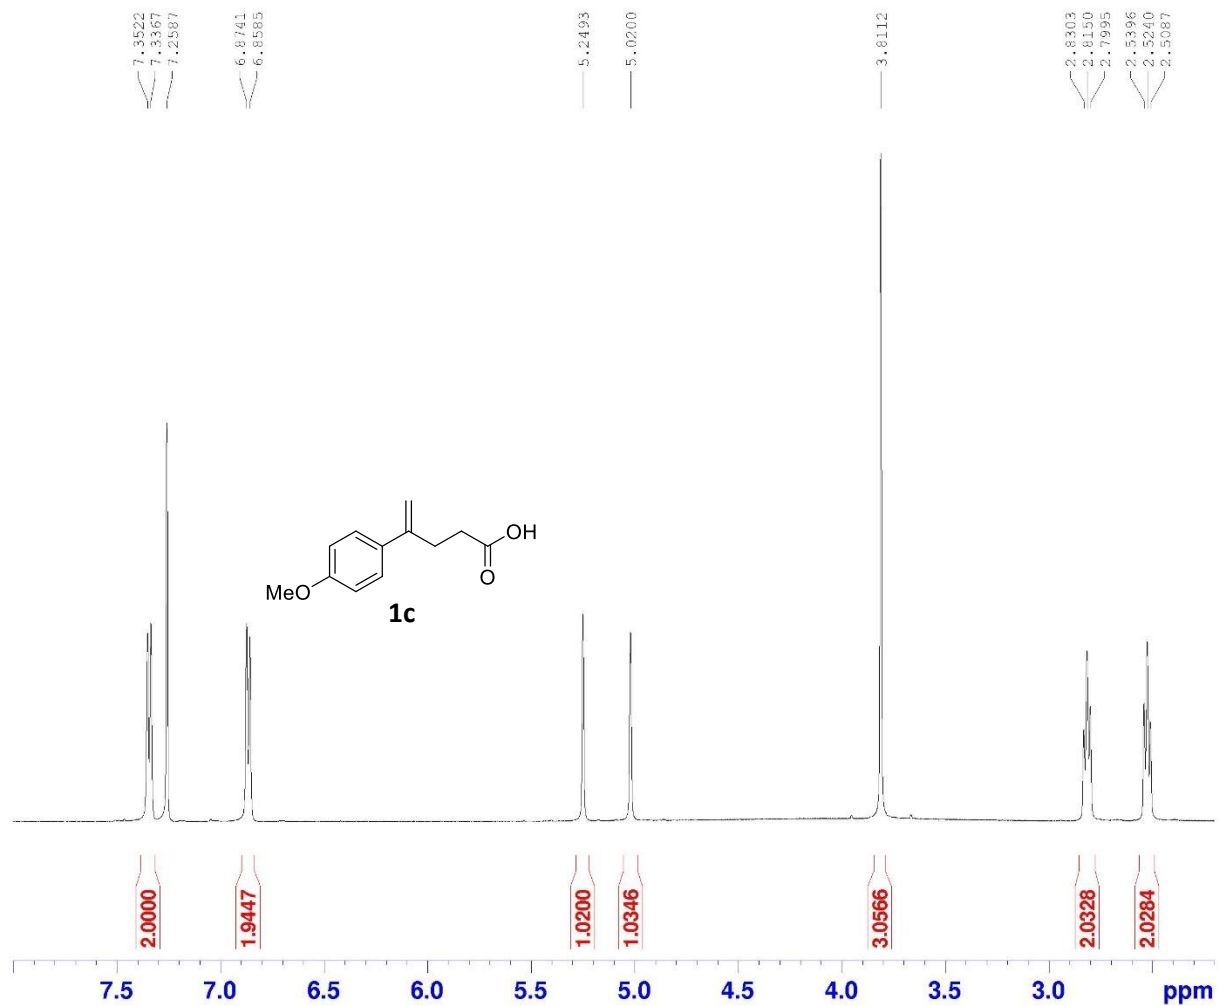

Current Data Parameters  
NAME JW323 data  
EXPNO 2  
PROCNO 1

F2 - Acquisition Parameters  
Date\_ 20201214  
Time 18.04 h  
INSTRUM spect  
PROBHD Z119470\_0283  
PULPROG zg30  
TD 65536  
SOLVENT CDCl3  
NS 16  
DS 2  
SWH 10000.000 Hz  
FIDRES 0.305176 Hz  
AQ 3.2767999 sec  
RG 142.5  
DW 50.000 usec  
DE 6.50 usec  
TE 295.1 K  
D1 1.00000000 sec  
TDO 1  
SFO1 500.1330683 MHz  
NUC1 1H  
P1 10.91 usec  
PLW1 25.00000000 W

F2 - Processing parameters  
SZ 65536  
SF 500.1300130 MHz  
WDW EM  
SSB 0  
LB 0.30 Hz  
GB 0  
PC 1.00



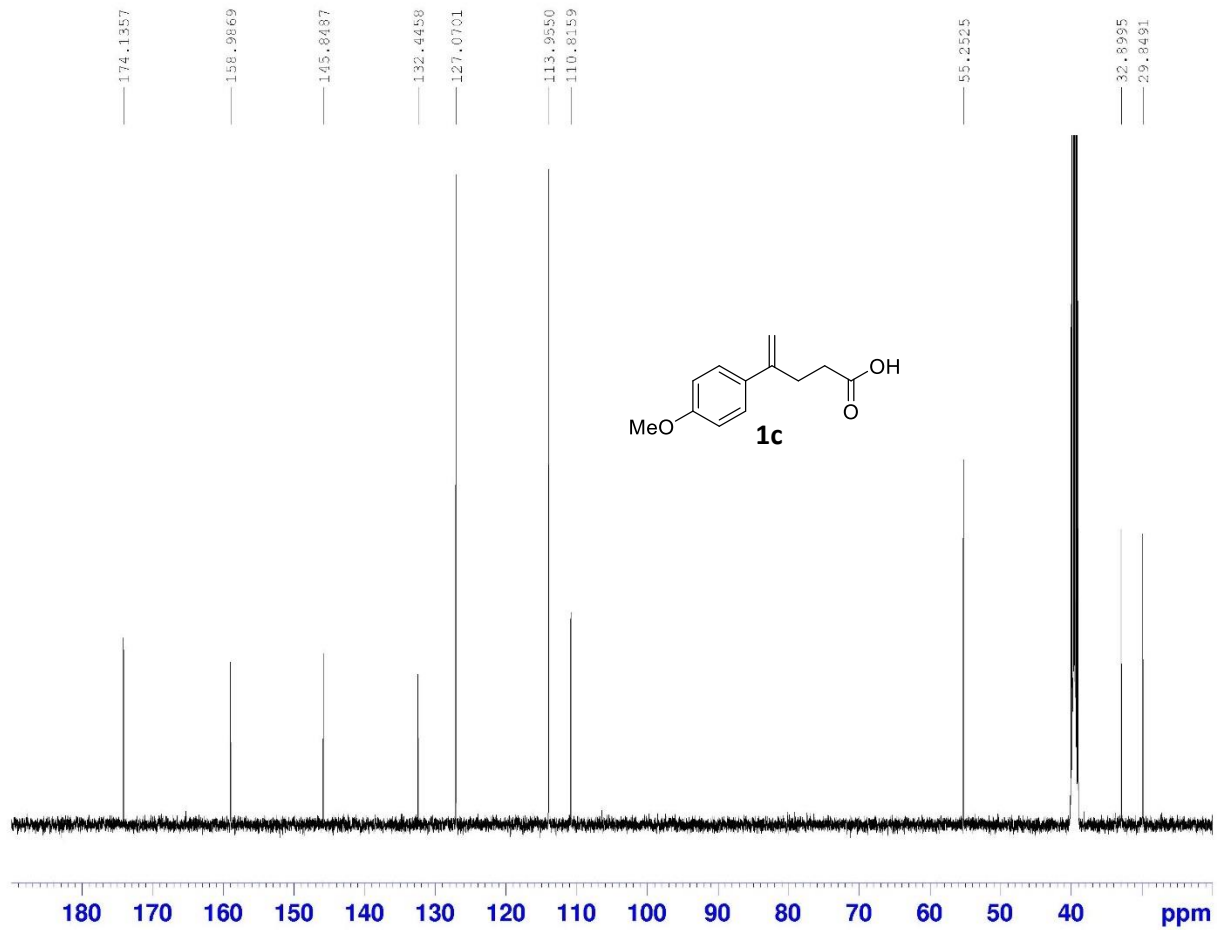

```

Current Data Parameters
NAME      JWS23 dmsc data
EXPNO    1
PROCNO   1

F2 - Acquisition Parameters
Data_    20201215
Time_    18.59 h
INSTRUM  spect
PROBHD   W119470_0283
PULPROG  zgpg30
TD        55336
SOLVENT  DMSO
NS        500
DS        4
SWH       23751.904 Hz
FIDRES    0.308261 Hz
AQ        1.1010048 sec
RG        205.72
DW        16.800 usec
DE        6.50 usec
TE        295.2 K
D1        2.0000000 sec
D11       0.0300000 sec
TD0       1
SFO1      125.7703643 MHz
NUC1      13C
P1        9.75 usec
PLW1      94.0000000 W
SFO2      500.1320005 MHz
NUC2      1H
CFDPRG[2] waltz16
PCPD2     80.00 usec
PLW2      25.0000000 W
PLW12     0.46495000 W
ELW13     0.23387000 W

F2 - Processing parameters
SI        32768
SF        125.7578242 MHz
AQW       HM
SSE       0
LA        1.00 Hz
GB        0
PC        1.40

```

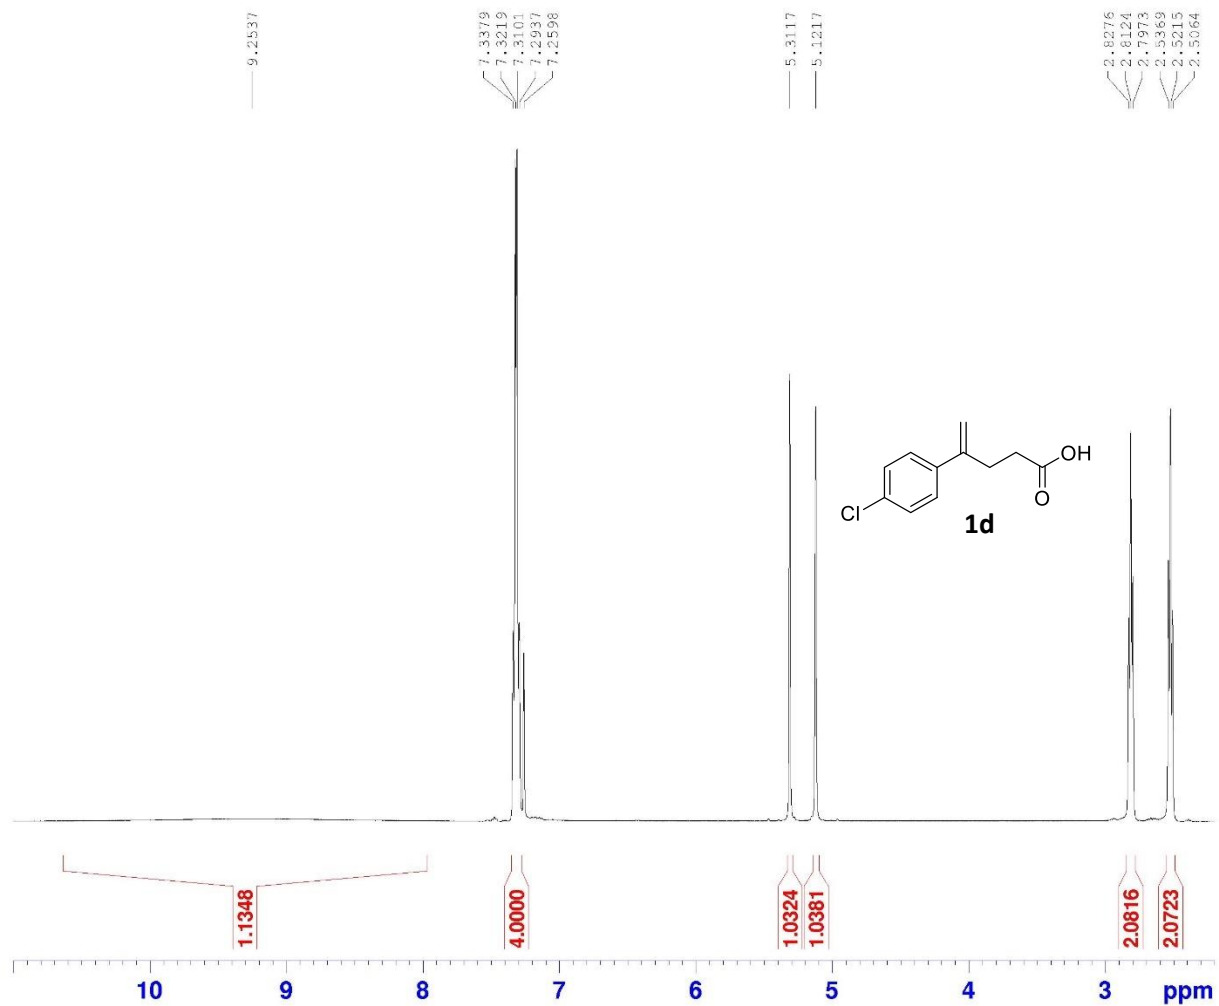

```

Current Data Parameters
NAME      JW324 data
EXPNO    1
PROCNO   1

F2 - Acquisition Parameters
Data_    20201214
Time     17.21 h
INSTRUM  spect
PROBHD   Z119470_0283
PULPROG  zg30
TD       65536
SOLVENT  CDCl3
NS       16
DS       2
SWH      10000.000 Hz
FIDRES   0.305176 Hz
AQ       3.2767999 sec
RG       102.6
DW       50.000 usec
DE       6.50 usec
TE       295.1 K
D1       1.00000000 sec
TDO      1
SFO1     500.1330683 MHz
NUC1     1H
P1       10.91 usec
PLW1     25.00000000 W

F2 - Processing parameters
SI       65536
SF       500.1300124 MHz
WDW      EM
SSB      0
LB       0.30 Hz
GB       0
PC       1.00

```

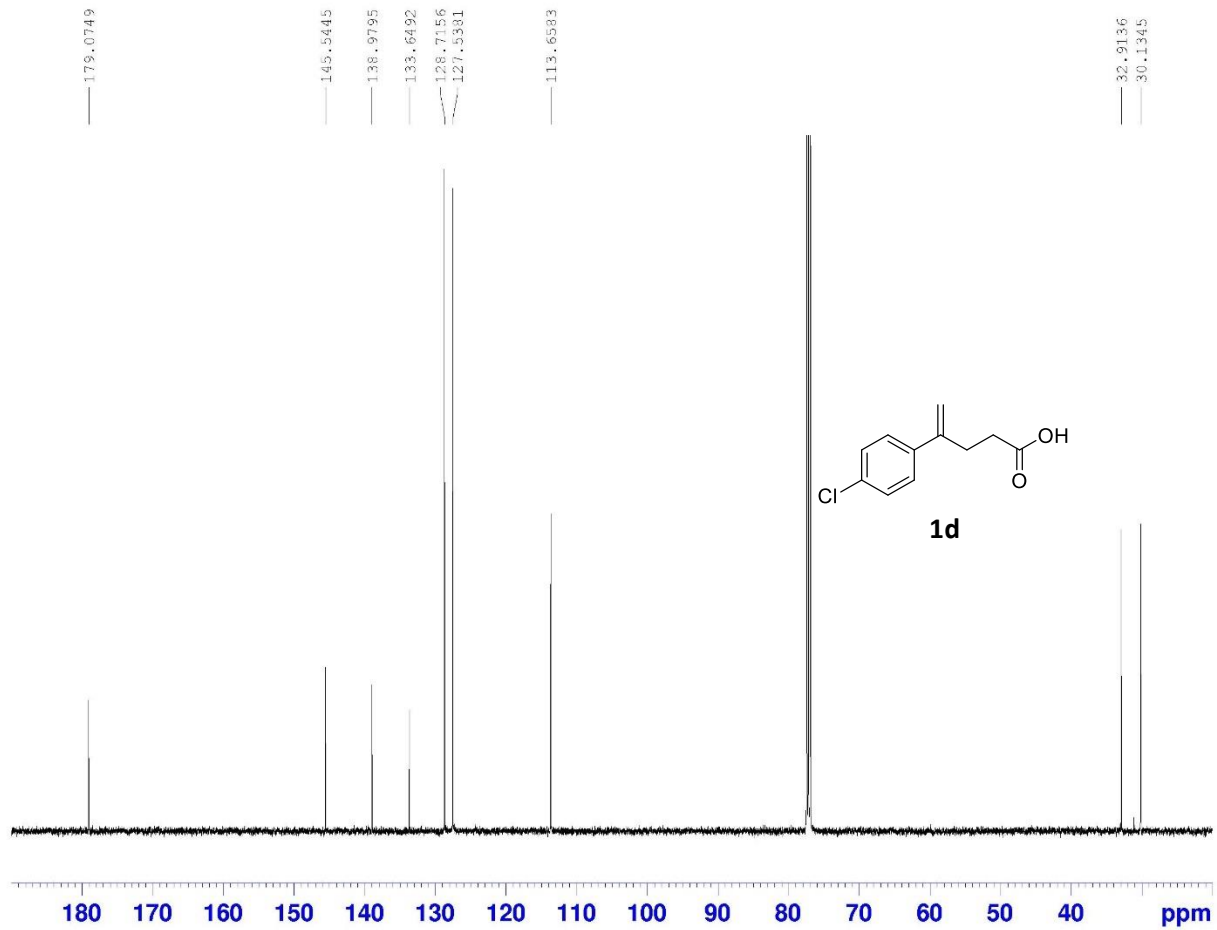

```

Current Data Parameters
NAME      JW324 data
EXPNO    2
PROCNO   1

F2 - Acquisition Parameters
Data_    20201214
Time_    21.14 h
INSTRUM  spect
PROBHD   5119470_0283
PULPROG  zgpg30
TD        65536
SOLVENT  CDCl3
NS        800
DS        4
SWH       23751.904 Hz
FIDRES    0.308261 Hz
AQ        1.1010048 sec
RG        205.72
DW        16.800 usec
DE        6.50 usec
TE        295.1 K
D1        2.0000000 sec
D11       0.0300000 sec
TD0       1
SFO1      125.7703643 MHz
NUC1      13C
P1        9.75 usec
PLW1      94.0000000 W
SFO2      500.1320005 MHz
NUC2      1H
CFDPRG[2] waltz16
PCPD2     80.00 usec
PLW2      25.0000000 W
PLW12     0.46495000 W
ELW13     0.23387000 W

F2 - Processing parameters
SI        32768
SF        125.7577734 MHz
AQW       BM
SSE       0
LA        1.00 Hz
GB        0
PC        1.40

```

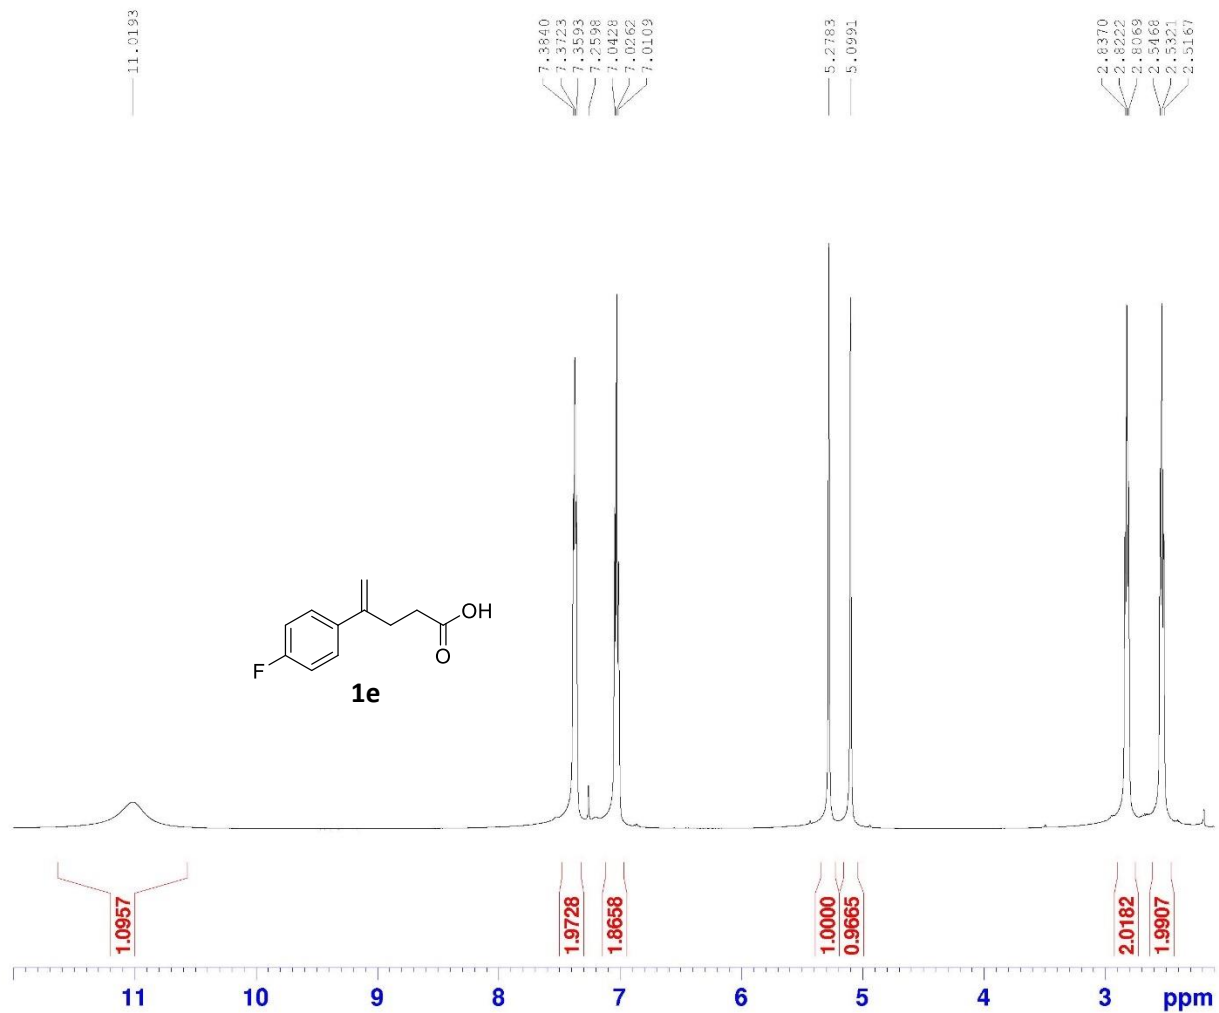

```

Current Data Parameters
NAME      JWZ60 data
EXPNO    1
PROCNO   1

F2 - Acquisition Parameters
Data_    20201215
Time     20.33 h
INSTRUM  spect
PROBHD   Z119470_0283
PULPROG  zg30
TD       65536
SOLVENT  CDCl3
NS       16
DS       2
SWH      10000.000 Hz
FIDRES   0.305176 Hz
AQ       3.2767999 sec
RG       30.85
DW       50.000 usec
DE       6.50 usec
TE       295.2 K
D1       1.00000000 sec
TDO      1
SFO1     500.1330883 MHz
NUC1     1H
P1       10.91 usec
PLW1     25.00000000 W

F2 - Processing parameters
SI       65536
SF       500.1300124 MHz
WDW      EM
SSB      0
LB       0.30 Hz
GB       0
PC       1.00

```

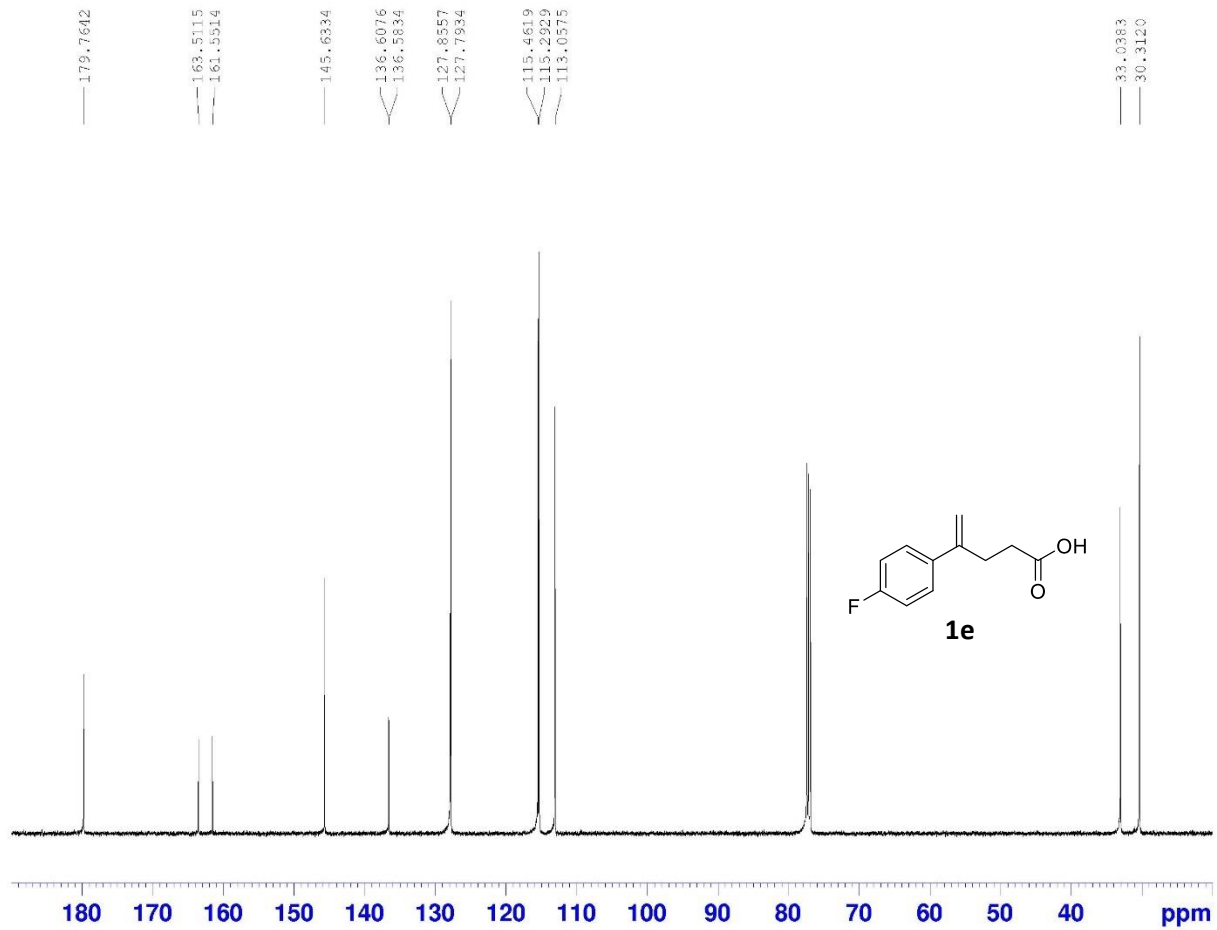

```

Current Data Parameters
NAME          JW260 data
EXPNO        2
PROCNO       1

F2 - Acquisition Parameters
Data_        20201215
Time_        21.11 h
INSTRUM      spect
PROBHD       W119470_0283
PULPROG      zgpg30
TD           55536
SOLVENT      CDC13
NS           700
DS           4
SWH          23761.904 Hz
FIDRES       0.308261 Hz
AQ           1.1010048 sec
RG           205.72
DW           16.800 usec
DE           6.50 usec
TE           295.2 K
D1           2.0000000 sec
D11          0.0300000 sec
TD0          1
SFO1         125.7703643 MHz
NUC1         13C
P1           9.75 usec
PLW1         94.0000000 W
SFO2         500.1320005 MHz
NUC2         1H
CFDPRG[2]   waltz16
PCPD2        80.00 usec
PLW2         25.0000000 W
PLW12        0.4649500 W
PLW13        0.2338700 W

F2 - Processing parameters
SI           32768
SF           125.7577767 MHz
AQW          BM
SSE          0
LA           1.00 Hz
GB           0
PC           1.40

```

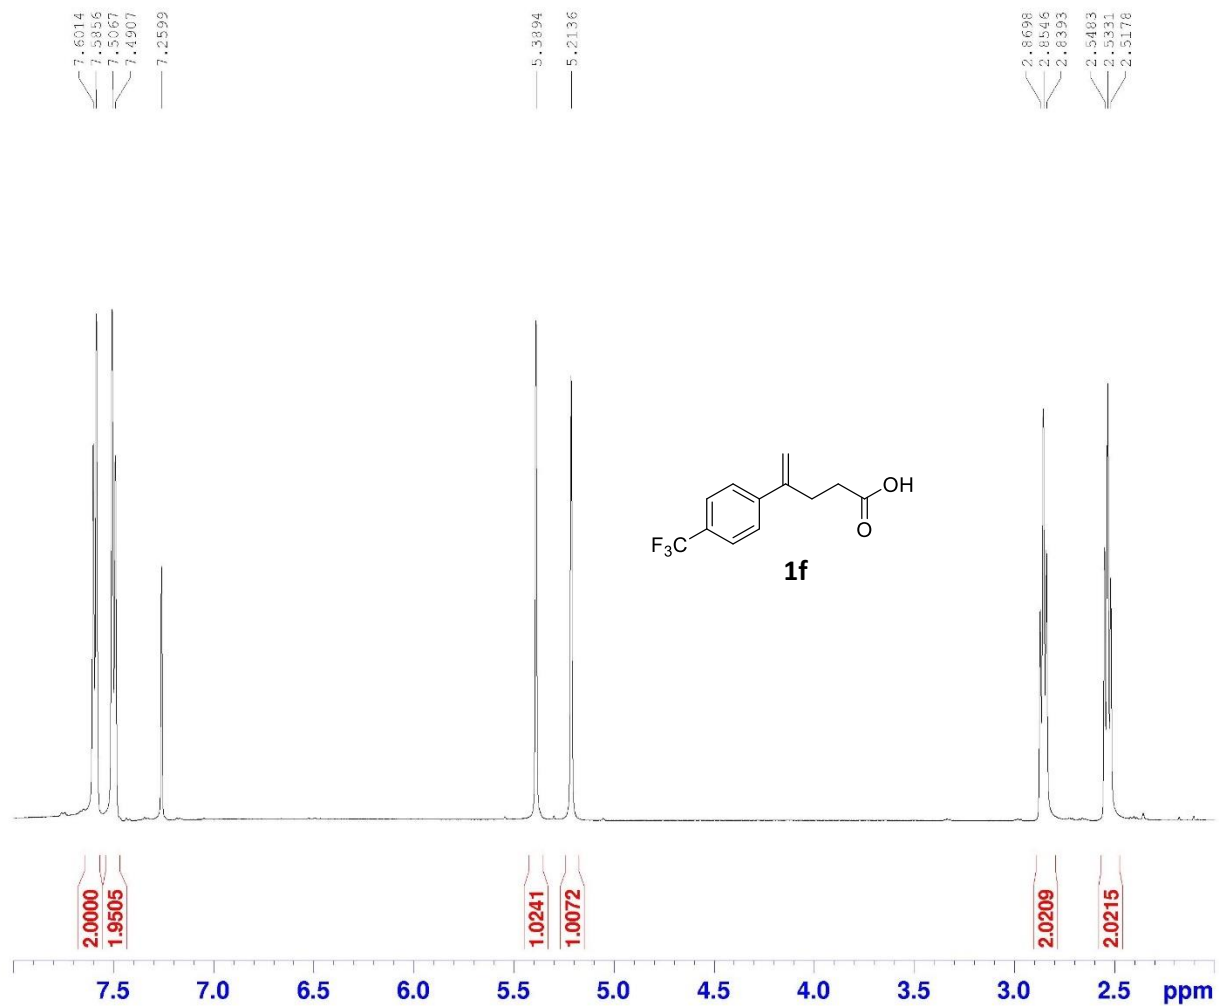

Current Data Parameters  
 NAME JW287 pile data  
 EXPNO 2  
 PROCNO 1

F2 - Acquisition Parameters  
 Date\_ 20201223  
 Time\_ 22.29 h  
 INSTRUM spect  
 PROBRD M119470\_0283  
 EULPROG zg30  
 TD 65536  
 SOLVENT CDCl3  
 NS 16  
 DS 2  
 SWH 10000.000 Hz  
 FIDRES 0.305176 Hz  
 AQ 3.2767999 sec  
 RG 142.5  
 DW 50.000 usec  
 DE 6.50 usec  
 TE 295.2 K  
 D1 1.00000000 sec  
 TDO 1  
 SPOL 500.1330683 MHz  
 NUC1 1H  
 P1 10.91 usec  
 PLW1 25.00000000 W

F2 - Processing parameters  
 SZ 65536  
 SF 500.1300121 MHz  
 WDW EM  
 SSB 0  
 LB 0.30 Hz  
 GB 0  
 PC 1.00

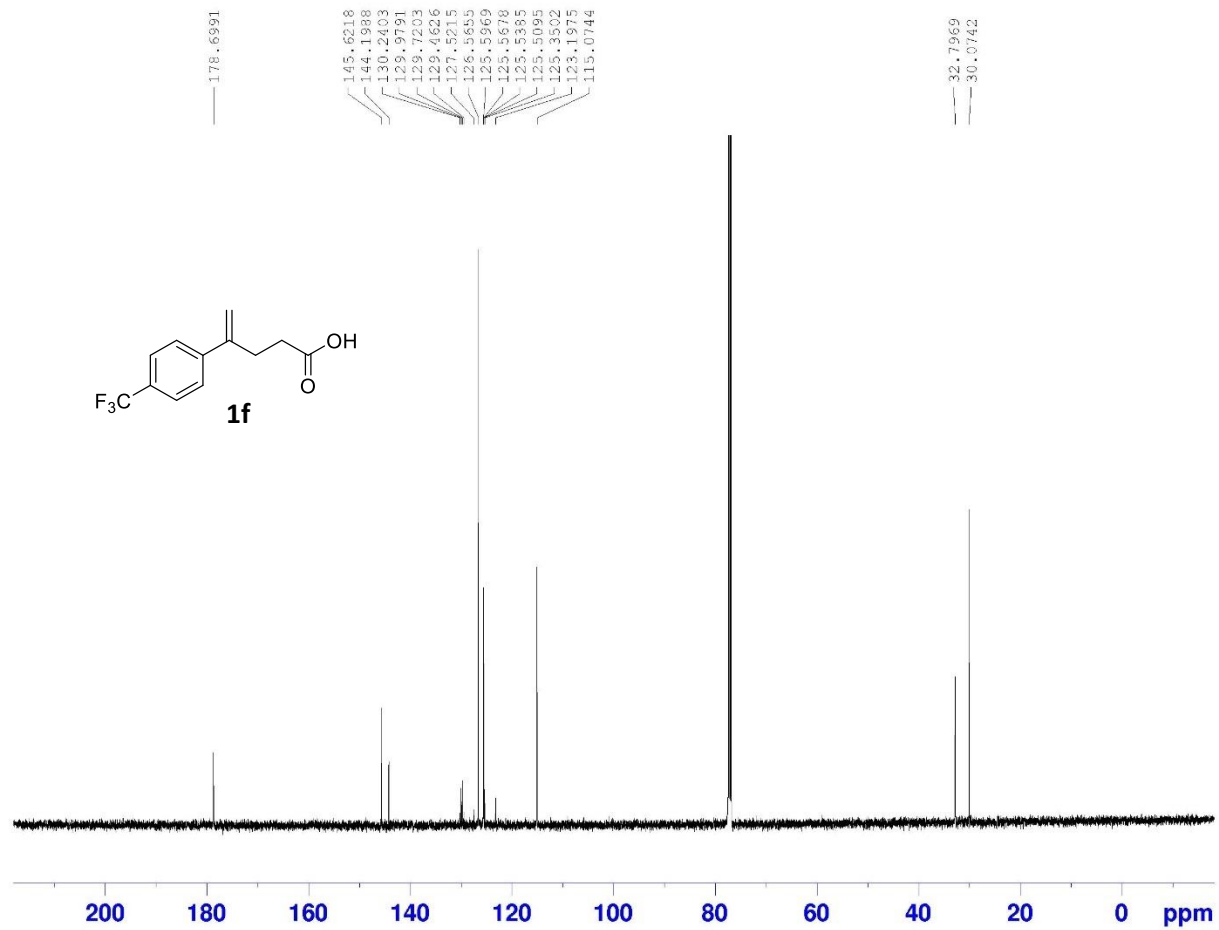

```

Current Data Parameters
NAME      JWZ87 pile data
EXPNO    1
PROCNO   1

F2 - Acquisition Parameters
Data_    20201223
Time_    22.27 h
INSTRUM  spect
PROBHD   M119470_0283
PULPROG  zgpg30
TD        55536
SOLVENT  cdcl3
NS        1024
DS        4
SWH       23751.904 Hz
FIDRES    0.308261 Hz
AQ        1.1010048 sec
RG        205.72
DW        16.800 usec
DE        6.50 usec
TK        295.1 K
D1        2.0000000 sec
D11       0.0300000 sec
TD0       1
SFO1      125.7703643 MHz
NUC1      13C
P1        9.75 usec
PLW1      94.0000000 W
SFO2      500.1320005 MHz
NUC2      1H
CFDPRG[2] waltz16
PCPD2     80.00 usec
PLW2      25.0000000 W
PLW12     0.46495000 W
ELW13     0.23387000 W

F2 - Processing parameters
SI        32768
SF        125.7577726 MHz
AQW       BM
SSE       0
LA        1.00 Hz
GB        0
PC        1.40

```

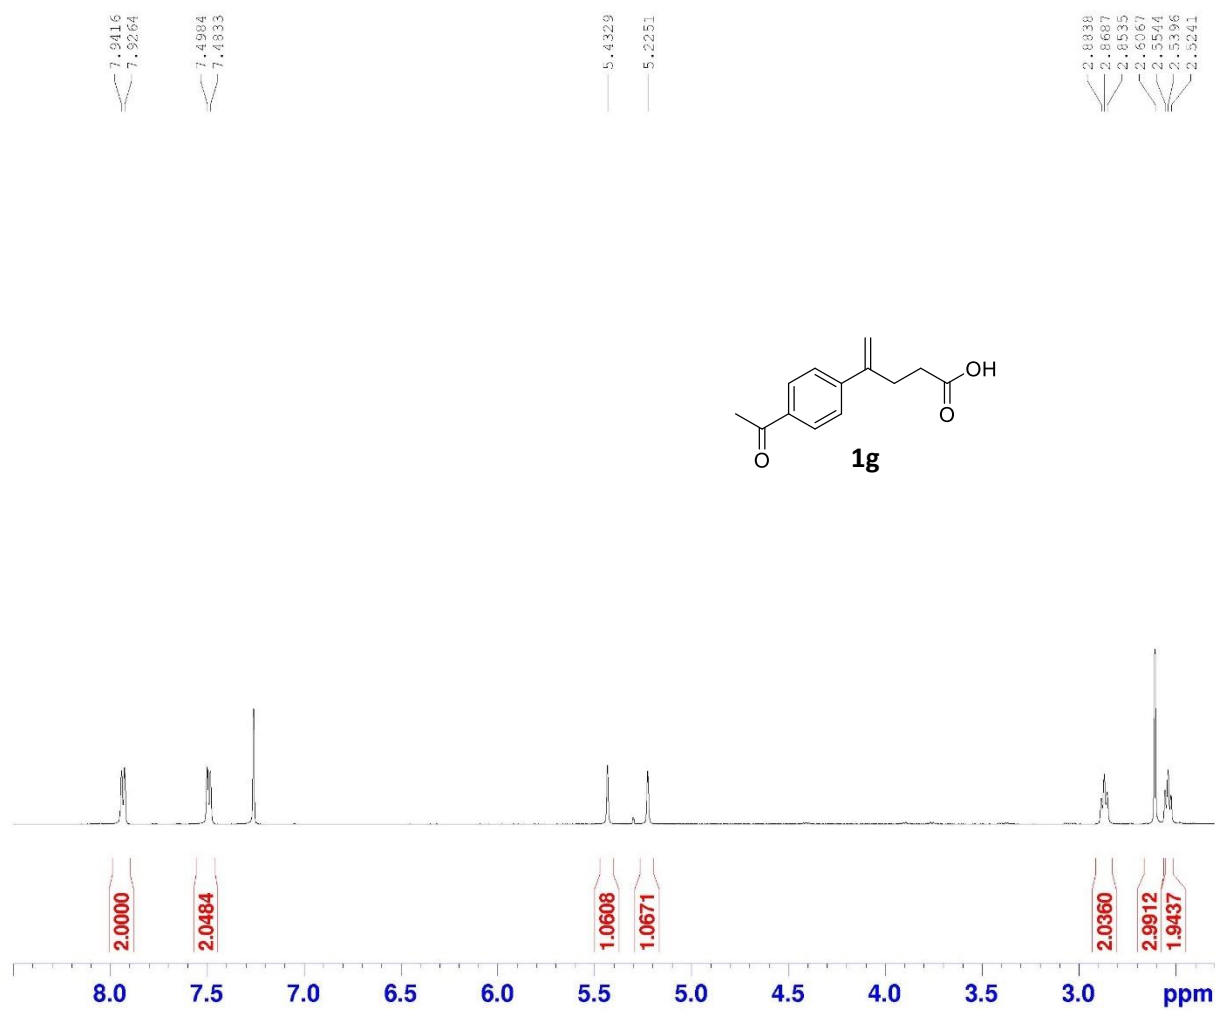

Current Data Parameters  
 NAME JW288 recryst data  
 EXPNO 1  
 PROCNO 1

F2 - Acquisition Parameters  
 Date\_ 20201215  
 Time\_ 21.56 h  
 INSTRUM spect  
 PROBRD M119470\_0283  
 EULPROG zg30  
 TD 65536  
 SOLVENT CDCl3  
 NS 9  
 DS 2  
 SWH 10000.000 Hz  
 FIDRES 0.305176 Hz  
 AQ 3.2767999 sec  
 RG 142.5  
 DW 50.000 usec  
 DE 6.50 usec  
 TG 295.1 K  
 D1 1.00000000 sec  
 TDO 1  
 SFO1 500.1330883 MHz  
 NUC1 1H  
 P1 10.91 usec  
 PLW1 25.00000000 W

F2 - Processing parameters  
 SZ 65536  
 SF 500.1300124 MHz  
 WDW EM  
 SSB 0  
 LB 0.30 Hz  
 GB 0  
 PC 1.00



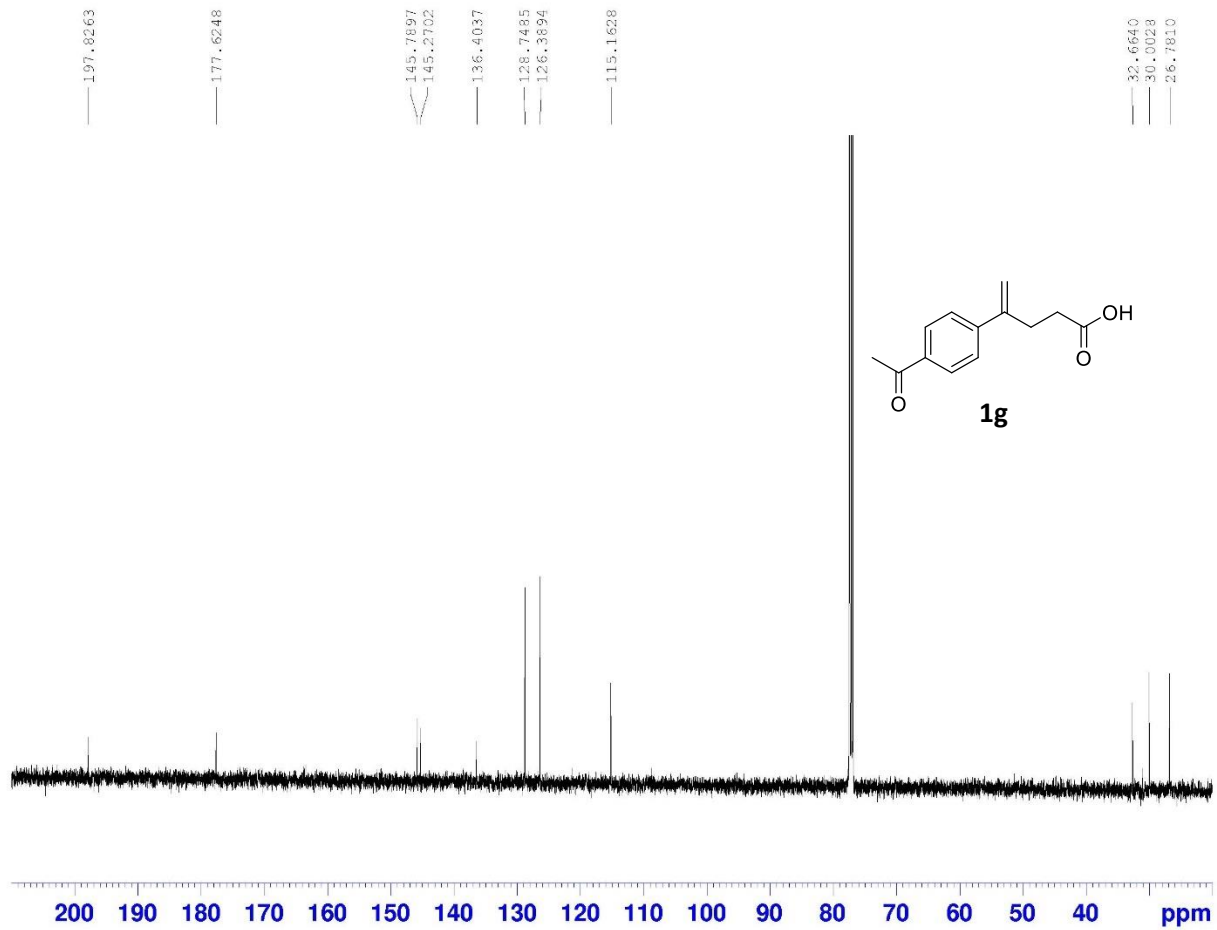

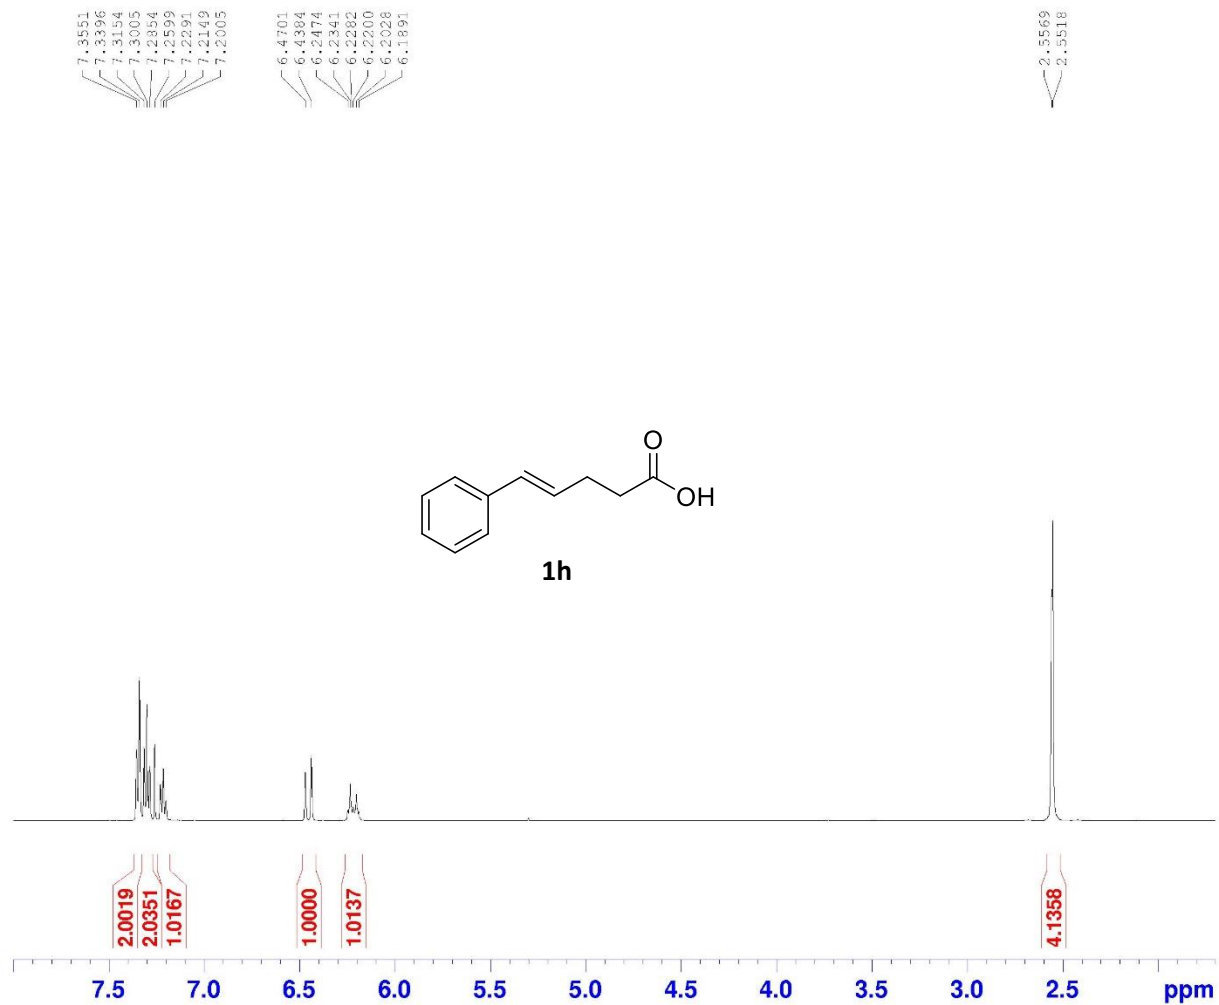

```

Current Data Parameters
NAME      JW312 data
EXPNO    2
PROCNO   1

F2 - Acquisition Parameters
Date_    20210113
Time     21.33 h
INSTRUM  spect
PROBHD   Z119470_0283
PULPROG  zg30
TD       65536
SOLVENT  CDCl3
NS       16
DS       2
SWH      10000.000 Hz
FIDRES   0.305176 Hz
AQ       3.2767999 sec
RG       102.6
DW       50.000 usec
DE       6.50 usec
TE       295.2 K
D1       1.00000000 sec
TDO      1
SFO1     500.1330883 MHz
NUC1     1H
P1       10.91 usec
PL1      25.00000000 W

F2 - Processing parameters
SC       65536
SF       500.1300121 MHz
WDW      EM
SSB      0
LA       0.30 Hz
GB       0
PC       1.00

```

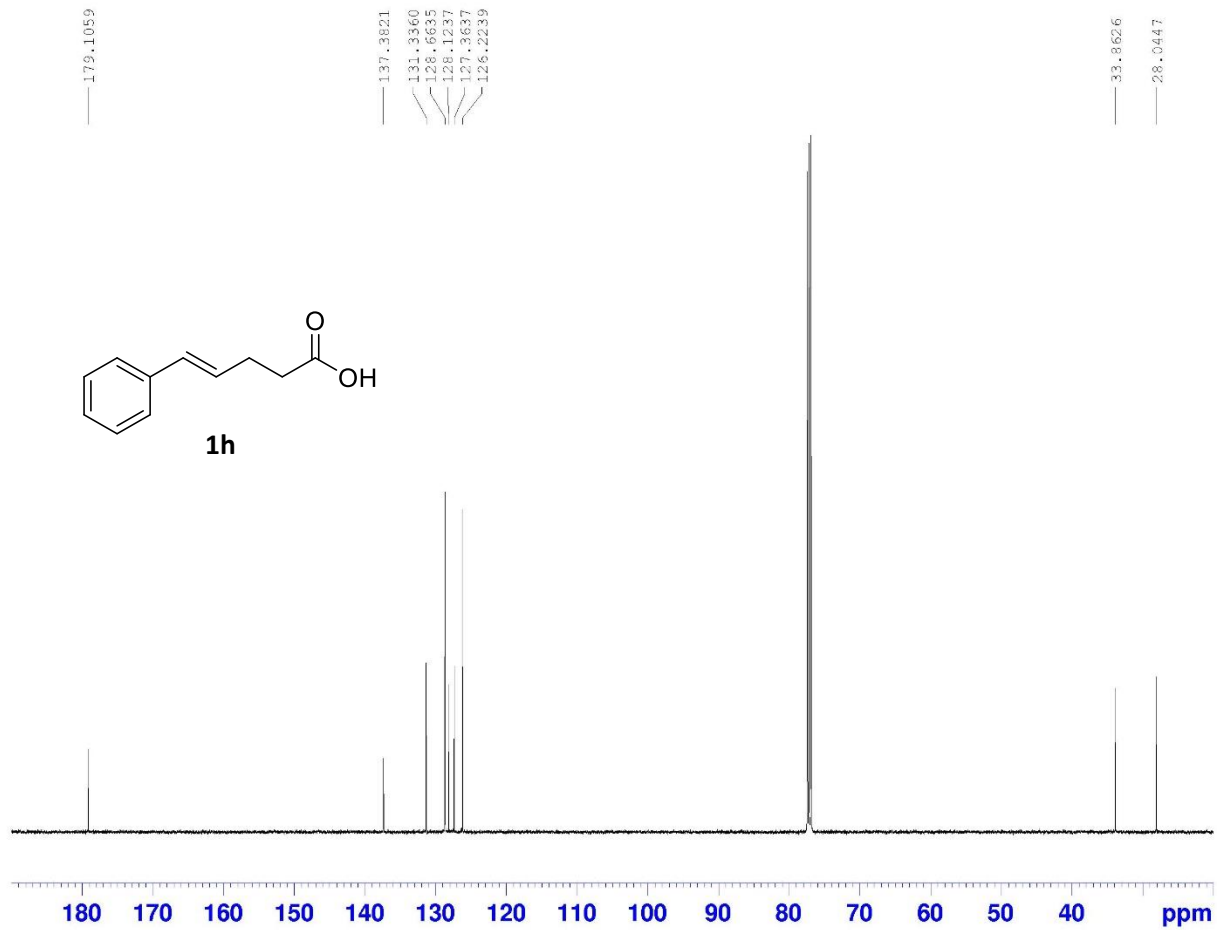

```

Current Data Parameters
NAME          JWS12 data
EXPNO        3
PROCNO       1

F2 - Acquisition Parameters
Date_        20210113
Time         22.28 h
INSTRUM      spect
PROBHD       Z119470_0283
PULPROG      zgpg30
TD           52536
SOLVENT      cdcl3
NS           1024
DS           4
SWH          29751.904 Hz
FIDRES       0.308261 Hz
AQ           1.1010048 sec
RG           142.5
DW           16.800 usec
DE           6.50 usec
TE           295.2 K
D1           2.0000000 sec
D11          0.0300000 sec
ZD0          1
SFO1         125.7703643 MHz
NUC1         13C
P1           9.75 usec
PLW1         94.0000000 W
SFO2         500.1320005 MHz
NUC2         1H
CQPCPG[2]    waltz16
PCPD2        80.00 usec
PLW2         25.0000000 W
PLW12        0.46495000 W
ELW13        0.23387000 W

F2 - Processing parameters
SI           32768
SF           125.7577737 MHz
WDW          BM
SSE          0
GB           1.00 Hz
PC           1.40

```

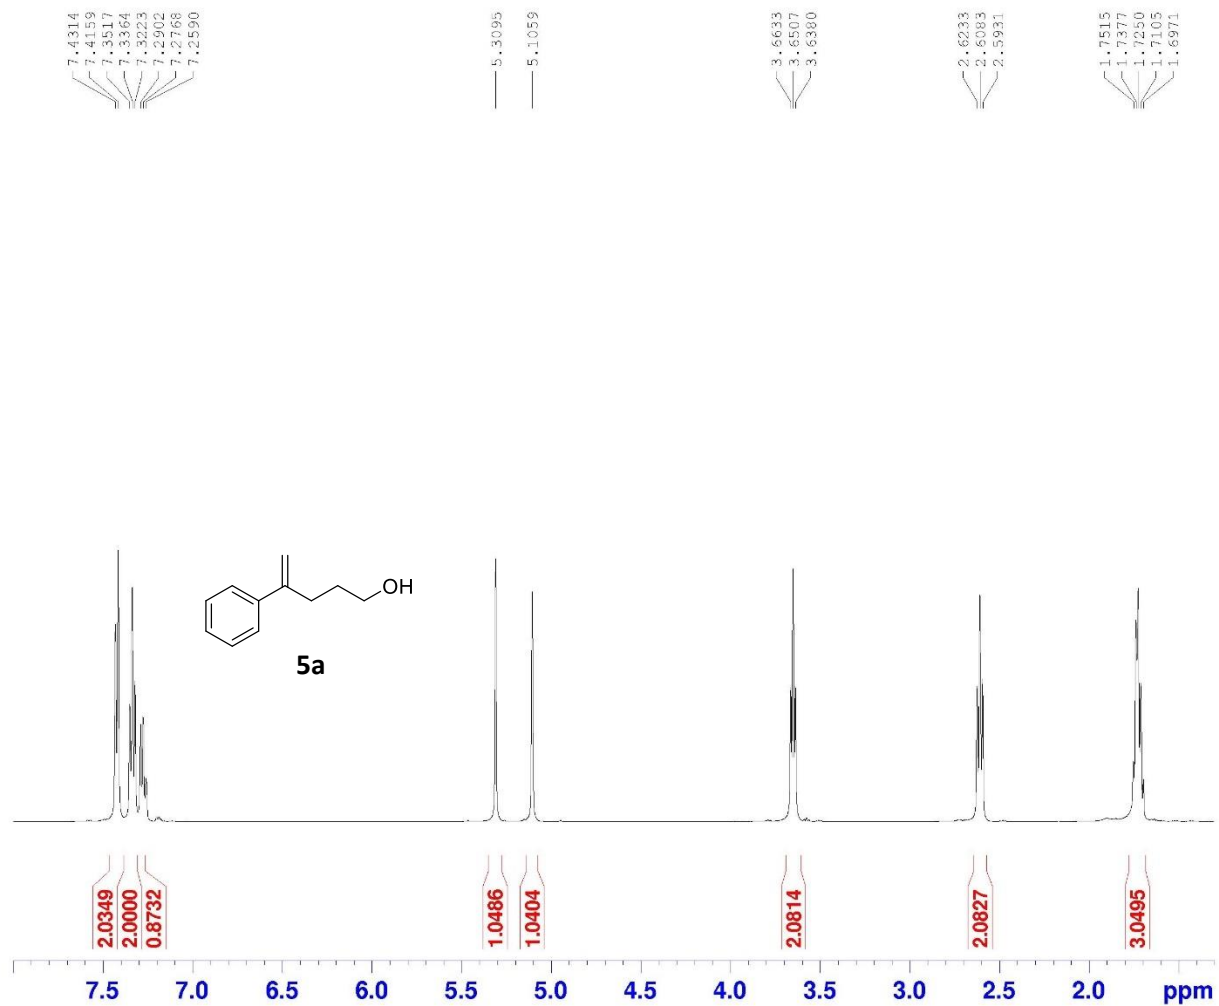

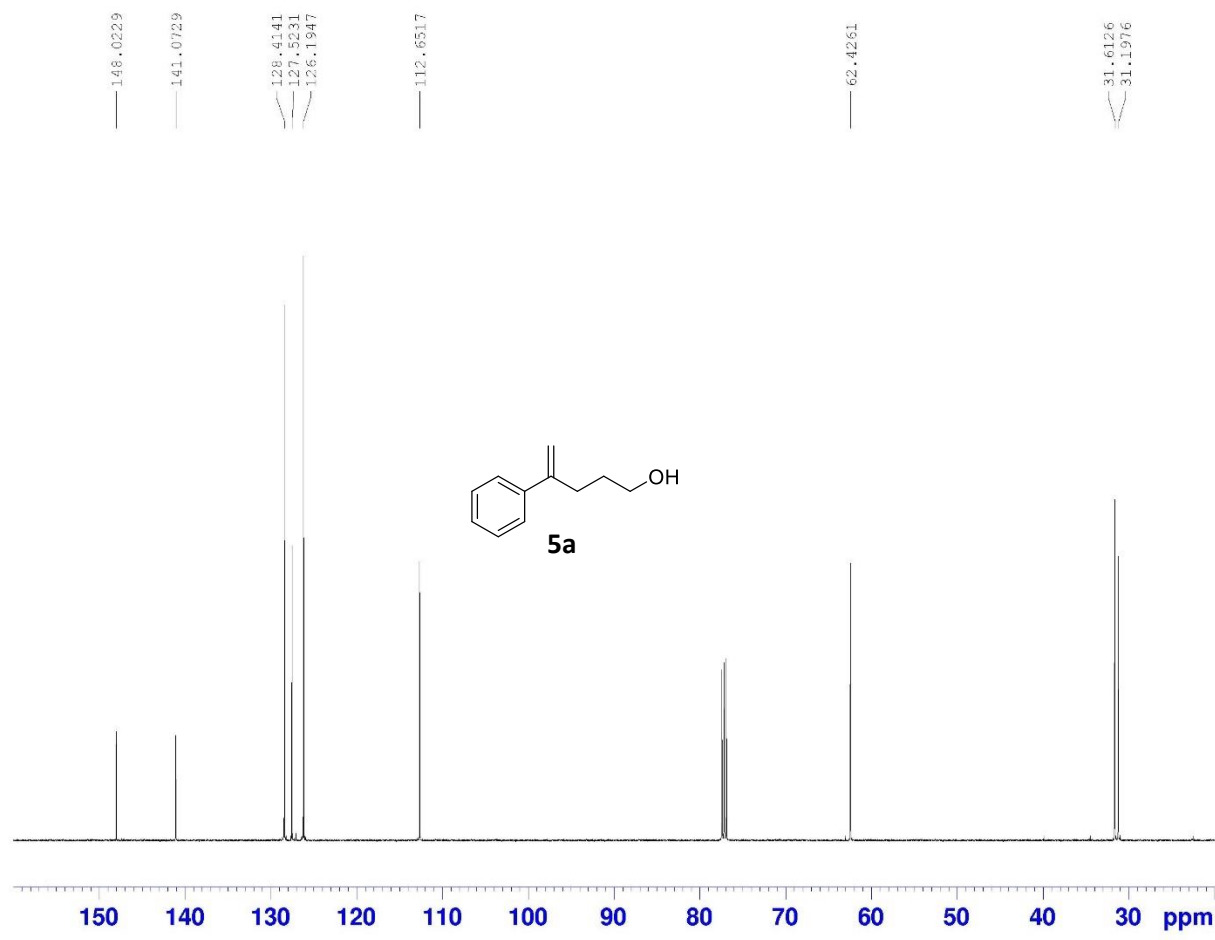

```

Current Data Parameters
NAME      JW340 data
EXPNO    2
PROCNO   1

F2 - Acquisition Parameters
Data_    20201202
Time     21.07 h
INSTRUM  spect
PROBHD   Z119470_0283
PULPROG  zgpg30
TD       55536
SOLVENT  CDCl3
NS       600
DS       4
SWH      23751.904 Hz
FIDRES   0.308261 Hz
AQ       1.1010048 sec
RG       205.72
DW       16.800 usec
DE       6.50 usec
TE       295.1 K
D1       2.0000000 sec
D11      0.0300000 sec
TD0      1
SFO1     125.7703643 MHz
NUC1     13C
P1       9.75 usec
PLW1     94.0000000 W
SFO2     500.1320005 MHz
NUC2     1H
CFDPRG[2] waltz16
PCPD2    80.00 usec
PLW2     25.0000000 W
PLW12    0.46495000 W
PLW13    0.23387000 W

F2 - Processing parameters
SI       32768
SF       125.7577826 MHz
AQW      BM
SSE      0
LA       1.00 Hz
GB       0
PC       1.40

```

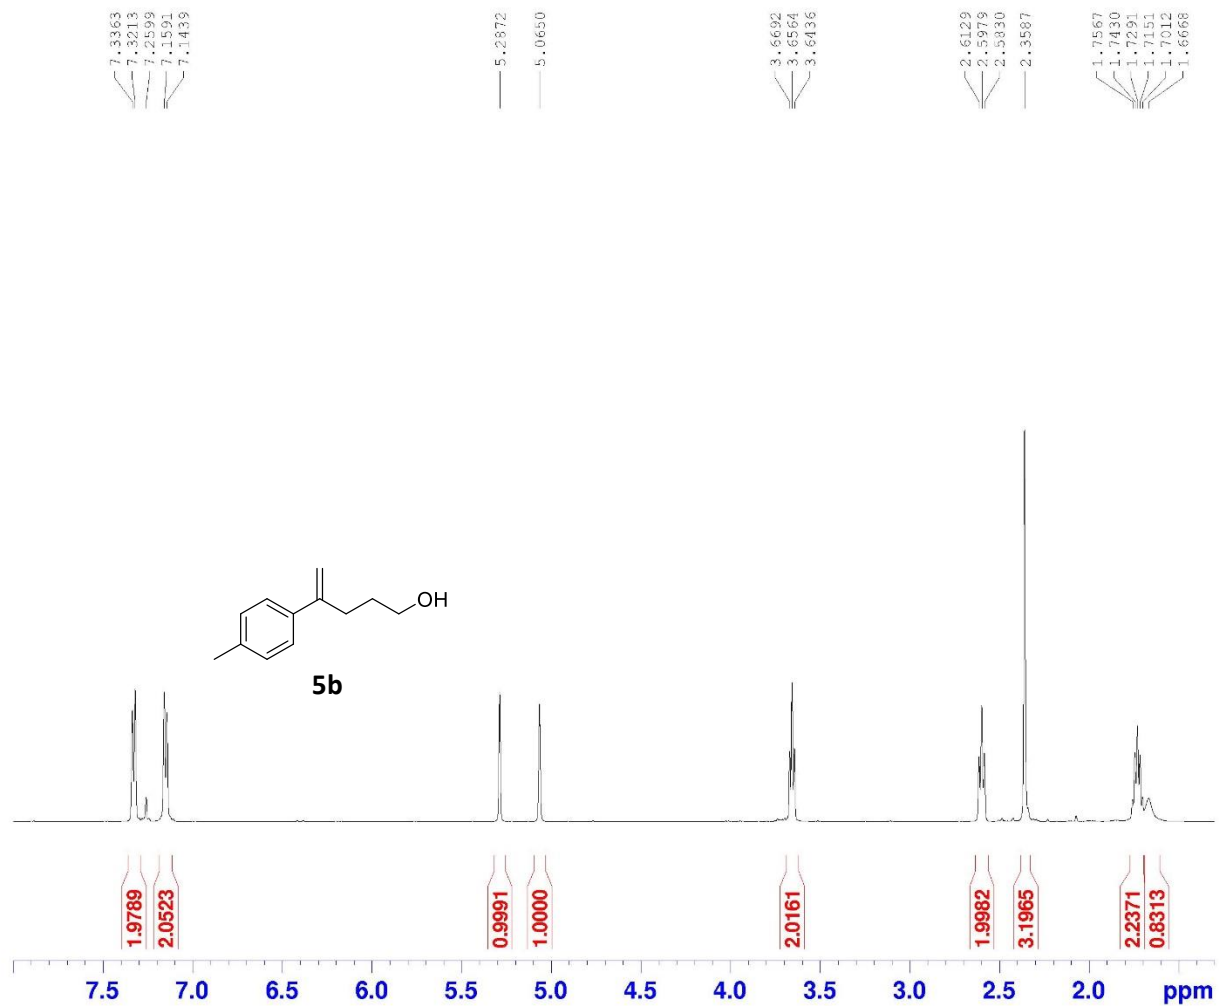

```

Current Data Parameters
NAME          JW237 data
EXPNO         1
PROCNO        1

F2 - Acquisition Parameters
Data_         20201216
Time_         21.15 h
INSTRUM       spect
PROBHD        W119470_0283
PULPROG       zg30
TD            65536
SOLVENT       CDCl3
NS            16
DS            2
SWH           10000.000 Hz
FIDRES        0.305176 Hz
AQ            3.2767999 sec
RG            30.85
DW            50.000 usec
DE            6.50 usec
TE            295.2 K
D1            1.00000000 sec
TD0           1
SFO1          500.1330883 MHz
NUC1           1H
P1            10.91 usec
PLW1          25.00000000 W

F2 - Processing parameters
SI            65536
SF            500.1300123 MHz
WDW           EM
SSB           0
LB            0.30 Hz
GB            0
PC            1.00

```

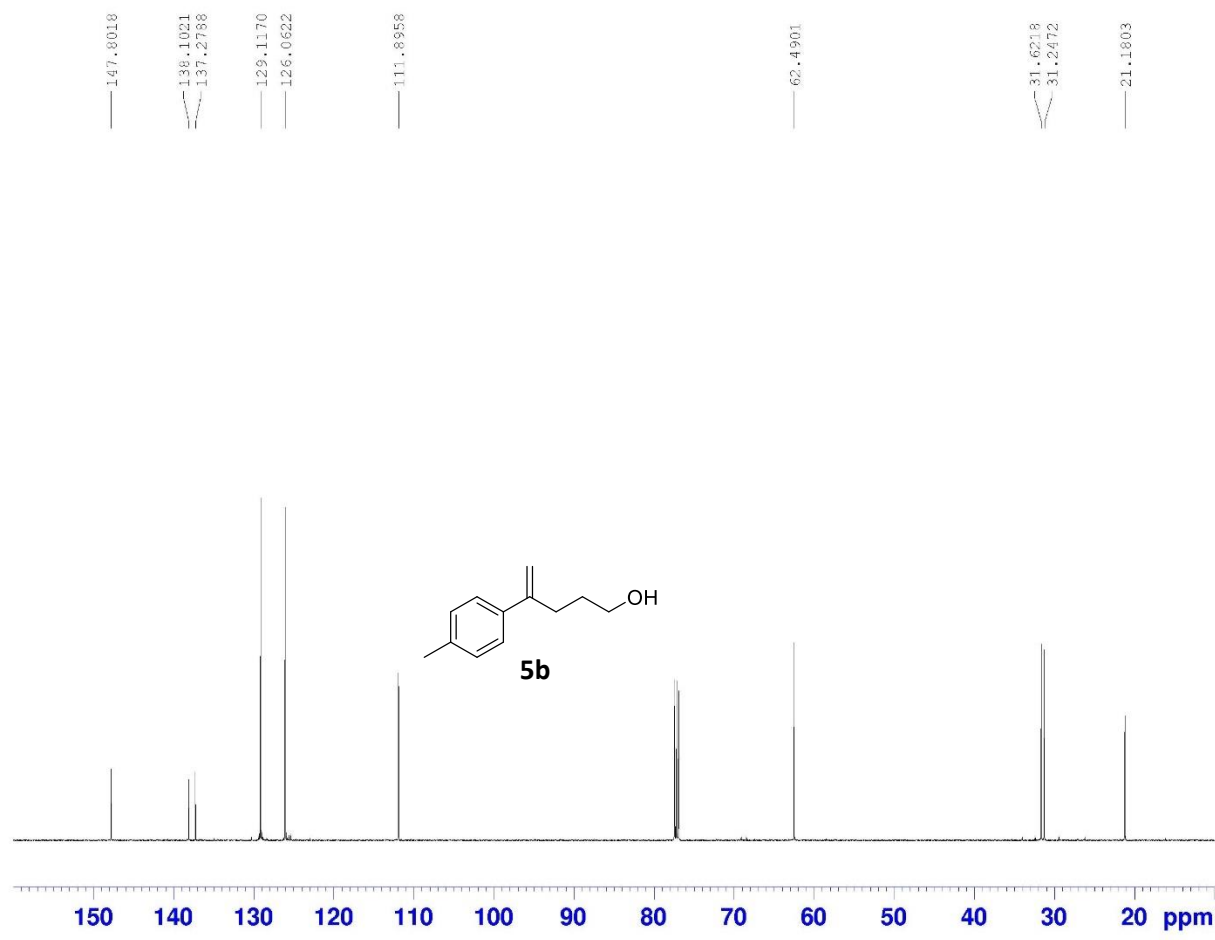

```

Current Data Parameters
NAME      JW237 data
EXPNO    2
PROCNO   1

F2 - Acquisition Parameters
Data_    20201216
Time_    21.52 h
INSTRUM  spect
PROBHD   Z119470_0283
PULPROG  zgpg30
TD        65536
SOLVENT  CDCl3
NS        700
DS        4
SWH       23761.904 Hz
FIDRES    0.308261 Hz
AQ        1.1010048 sec
RG        206.72
DW        16.800 usec
DE        6.50 usec
TE        295.2 K
D1        2.0000000 sec
D11       0.0300000 sec
TD0       1
SFO1      125.7703643 MHz
NUC1      13C
P1        9.75 usec
PLW1      94.0000000 W
SFO2      500.1320005 MHz
NUC2      1H
CFDPRG[2] waltz16
PCPD2     80.00 usec
PLW2      25.0000000 W
PLW12     0.46495000 W
ELW13     0.23387000 W

F2 - Processing parameters
SI        32768
SF        125.7577814 MHz
AQW       BM
SSE       0
LA        1.00 Hz
GB        0
PC        1.40

```

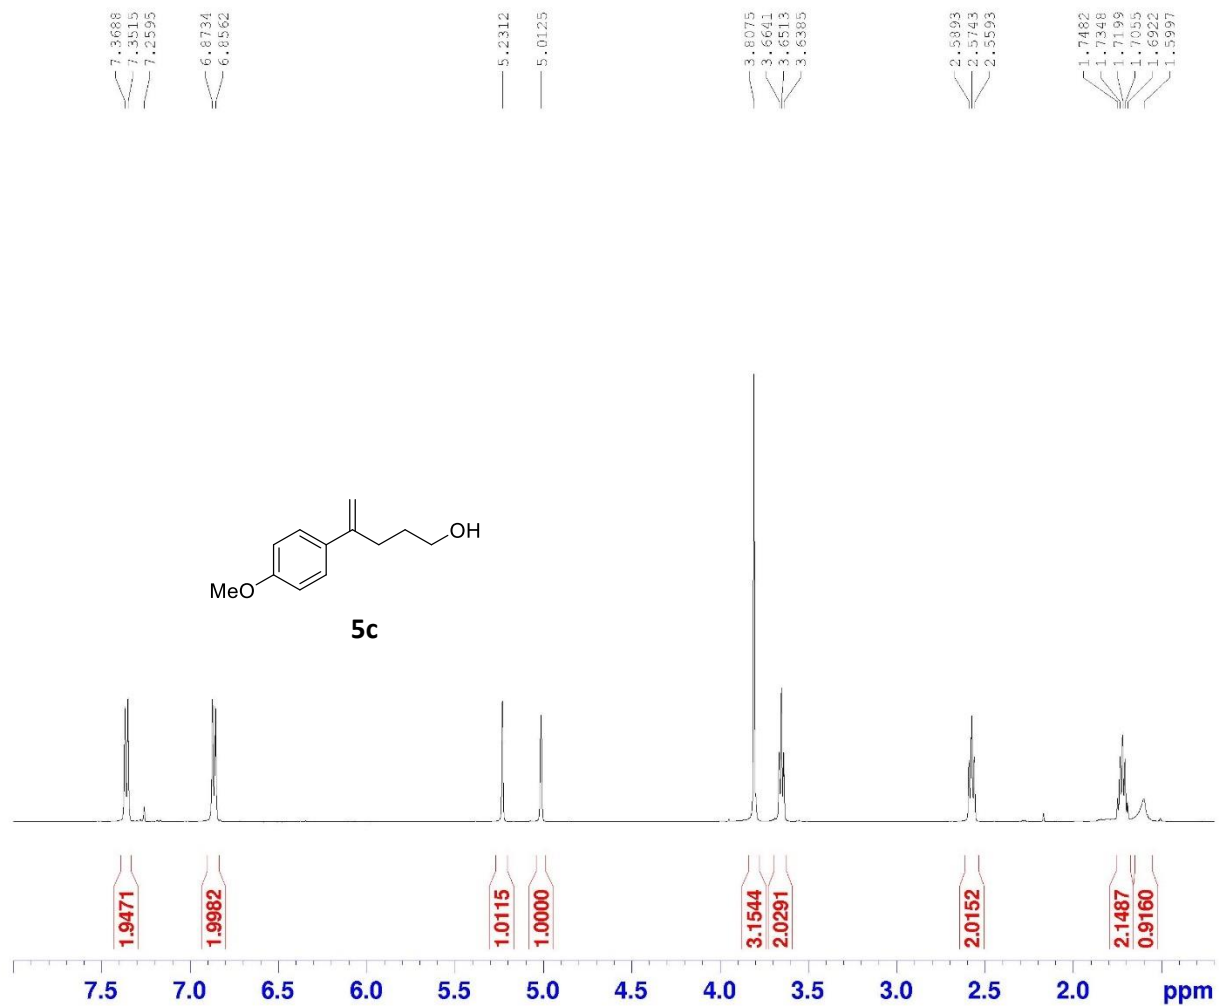

```

Current Data Parameters
NAME          JW294 data
EXPNO         1
PROCNO        1

F2 - Acquisition Parameters
Date_         20201211
Time_         0.39 h
INSTRUM       spect
PROBHD        W119470_0283
PULPROG       zg30
TD            65536
SOLVENT       CDCl3
NS            16
DS            2
SWH           10000.000 Hz
FIDRES        0.305176 Hz
AQ            3.2767999 sec
RG            30.85
DW            50.000 usec
DE            6.50 usec
TE            295.1 K
D1            1.00000000 sec
TD0           1
SFO1          500.1330883 MHz
NUC1          1H
P1            10.91 usec
PLW1          25.00000000 W

F2 - Processing parameters
SI            65536
SF            500.1300128 MHz
WDW           EM
SSB           0
LB            0.30 Hz
GB            0
PC            1.00
  
```



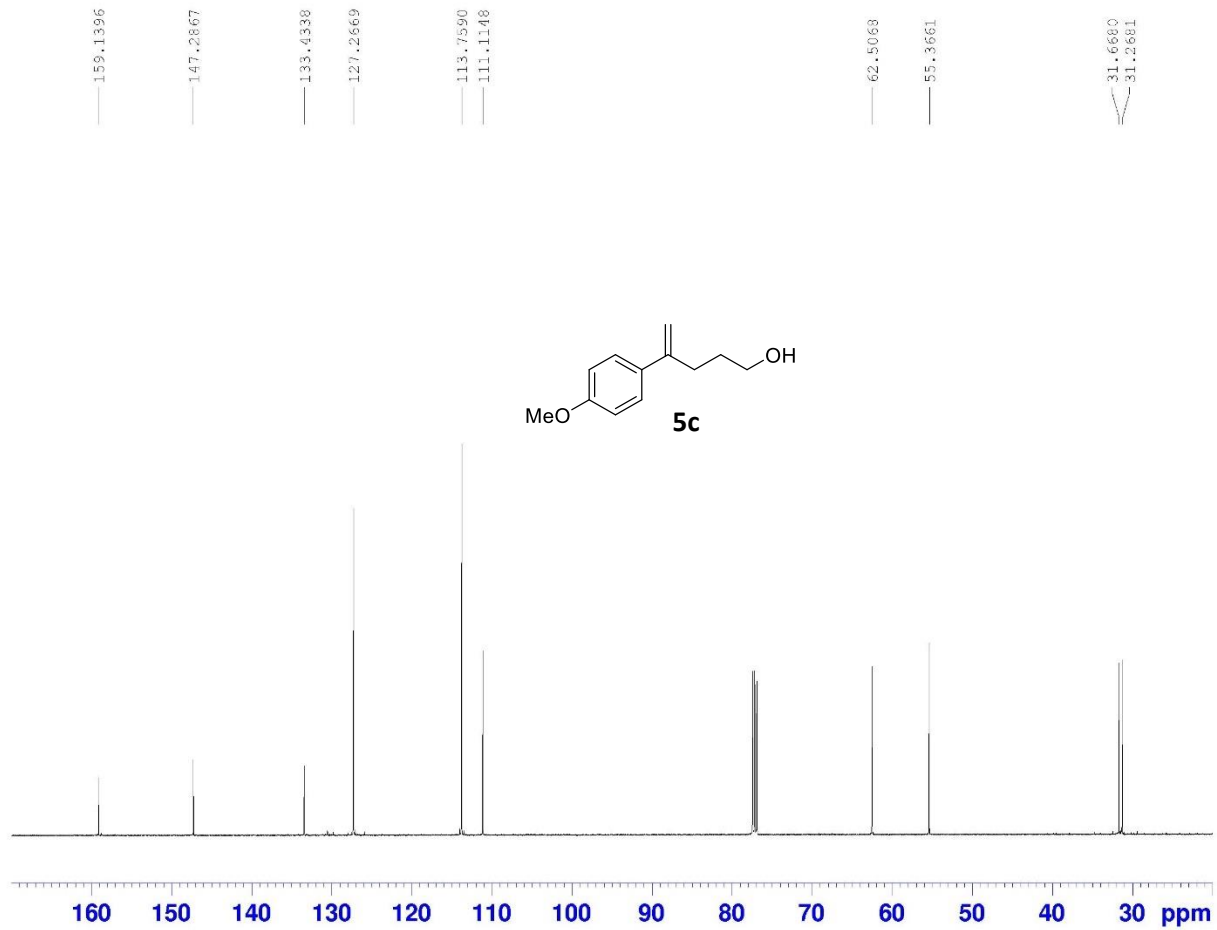

```

Current Data Parameters
NAME      JW294 data
EXPNO    2
PROCNO   1

F2 - Acquisition Parameters
Data_    20201211
Time     1.33 h
INSTRUM  spect
PROBHD   Z119470_0283
PULPROG  zgpg30
TD       55536
SOLVENT  cdcl3
NS       1024
DS       4
SWH      23761.904 Hz
FIDRES   0.308261 Hz
AQ       1.1010048 sec
RG       206.72
DW       16.800 usec
DE       6.50 usec
TE       295.2 K
D1       2.0000000 sec
D11      0.0300000 sec
TD0      1
SFO1     125.7703643 MHz
NUC1     13C
P1       9.75 usec
PLW1     94.0000000 W
SFO2     500.1320005 MHz
NUC2     1H
CFDPRG[2] waltz16
PCPD2    80.00 usec
PLW2     25.0000000 W
PLW12    0.46495000 W
PLW13    0.23387000 W

F2 - Processing parameters
SI       32768
SF       125.7577798 MHz
AQW      BM
SSE      0
LA       1.00 Hz
GB       0
PC       1.40

```

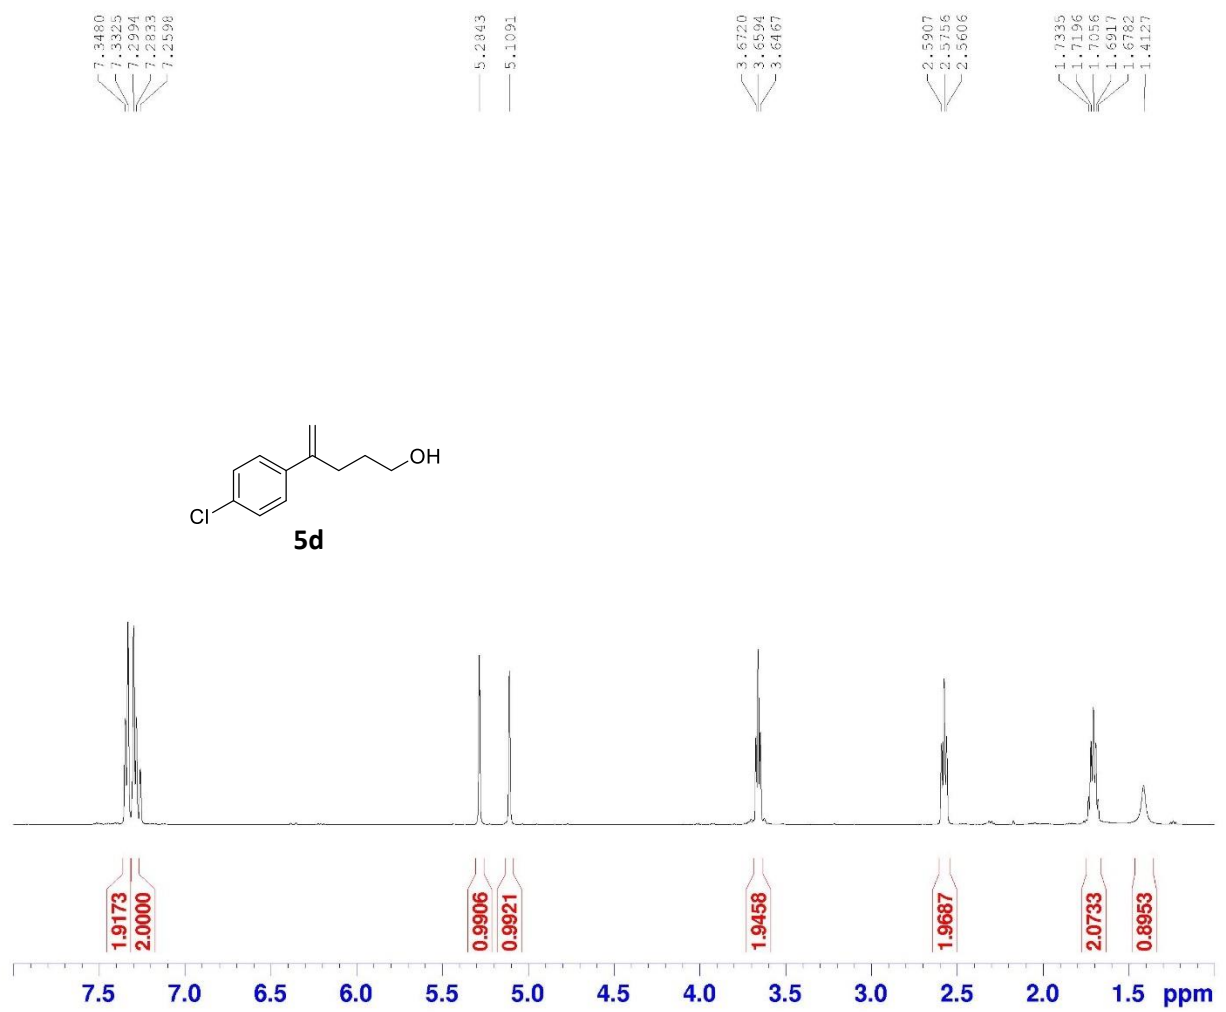

```

Current Data Parameters
NAME      JW298 data
EXPNO    1
PROCNO   1

F2 - Acquisition Parameters
Date_    20201216
Time     21.56 h
INSTRUM  spect
PROBHD   Z119470_0283
PULPROG  zg30
TD        65536
SOLVENT  CDCl3
NS        16
DS        2
SWH       10000.000 Hz
FIDRES    0.305176 Hz
AQ        3.2767999 sec
RG        71.76
DW        50.000 usec
DE        6.50 usec
TE        295.2 K
D1        1.00000000 sec
TD0       1
SFO1     500.1330883 MHz
NUC1      1H
P1        10.91 usec
PL1       25.00000000 W

F2 - Processing parameters
SI        65536
SF        500.1300114 MHz
WDW       EM
SSB       0
LB        0.30 Hz
GB        0
PC        1.00
  
```

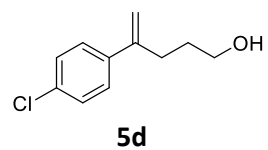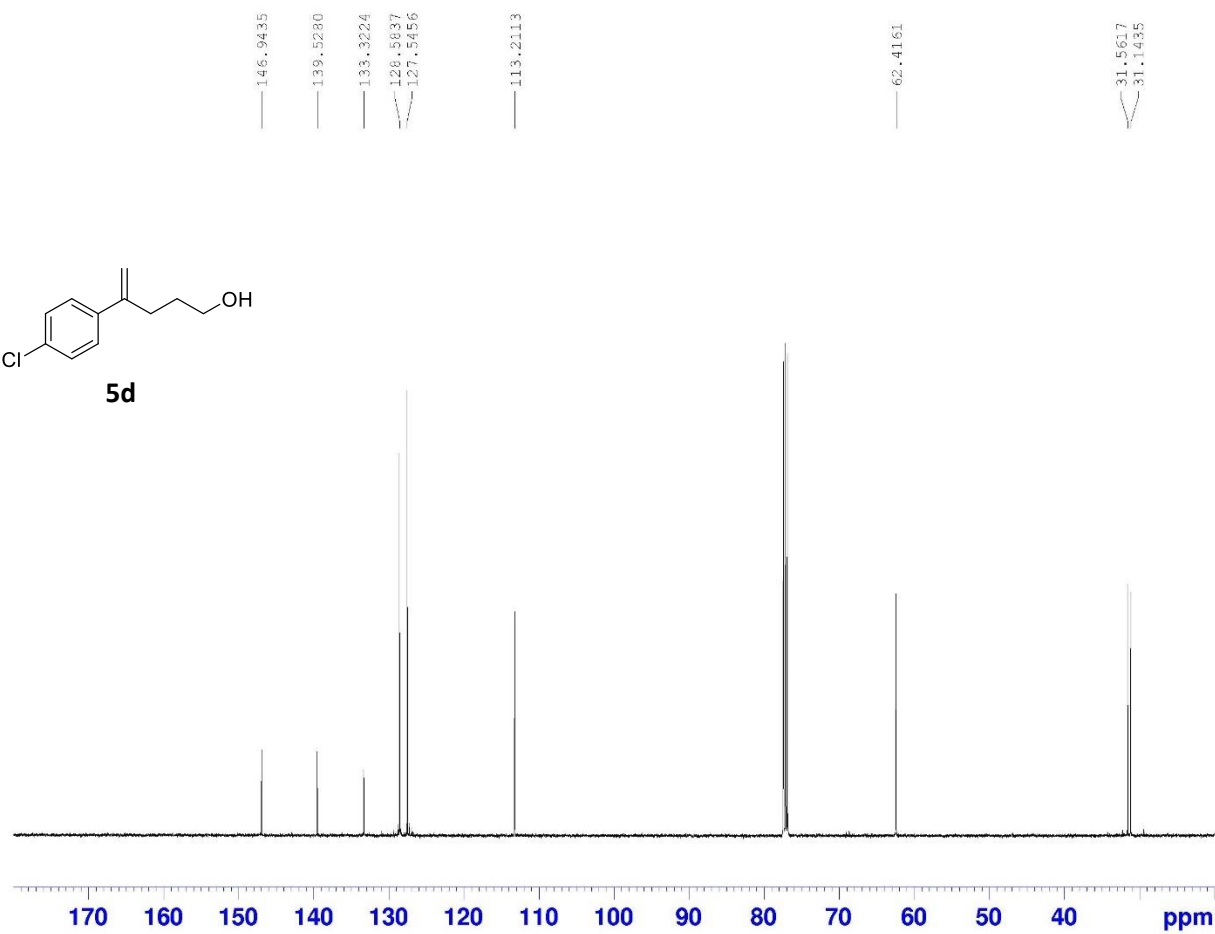

```

Current Data Parameters
NAME      JW298 data
EXPNO     2
PROCNO    1

F2 - Acquisition Parameters
Date_     20201216
Time      22.34 h
INSTRUM   spect
PROBHD    Z119470_0283
PULPROG   zgpg30
TD         55536
SOLVENT   CDCl3
NS         700
DS         4
SWH        23751.904 Hz
FIDRES     0.308261 Hz
AQ         1.1010048 sec
RG         205.72
DW         16.800 usec
DE         6.50 usec
TE         295.1 K
D1         2.0000000 sec
D11        0.0300000 sec
TD0        1
SFO1       125.7703643 MHz
NUC1       13C
P1         9.75 usec
PLW1       94.0000000 W
SFO2       500.1320005 MHz
NUC2       1H
CFDPRG[2] waltz16
PCPD2     80.00 usec
PLW2       25.0000000 W
PLW12     0.46495000 W
ELW13     0.23387000 W

F2 - Processing parameters
SI         32768
SF         125.7577753 MHz
AQW        BM
SSE        0
LA         1.00 Hz
GB         0
PC         1.40
  
```

7.3805  
7.3681  
7.3553  
7.2600  
7.0199  
7.0039  
6.9877

5.2389  
5.0722

3.6555  
3.6429  
3.6302

2.5800  
2.5650  
2.5499

1.7988  
1.7261  
1.7122  
1.6982  
1.6844  
1.6708

```
Current Data Parameters
NAME          JW235 data
EXPNO         1
PROCNO        1

F2 - Acquisition Parameters
Data_         20201216
Time_         20.33 h
INSTRUM       spect
PROBHD        W119470_0283
PULPROG       zg30
TD            65536
SOLVENT       CDCl3
NS            16
DS            2
SWH           10000.000 Hz
FIDRES        0.305176 Hz
AQ            3.2767999 sec
RG            30.85
DW            50.000 usec
DE            6.50 usec
TE            295.1 K
D1            1.00000000 sec
TDO           1
SFO1          500.1330683 MHz
NUC1           1H
P1            10.91 usec
PLW1          25.00000000 W

F2 - Processing parameters
SI            65536
SF            500.1300120 MHz
WDW           EM
SSB           0
LB            0.30 Hz
GB            0
PC            1.00
```

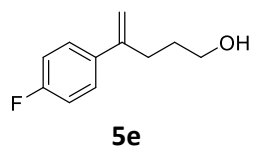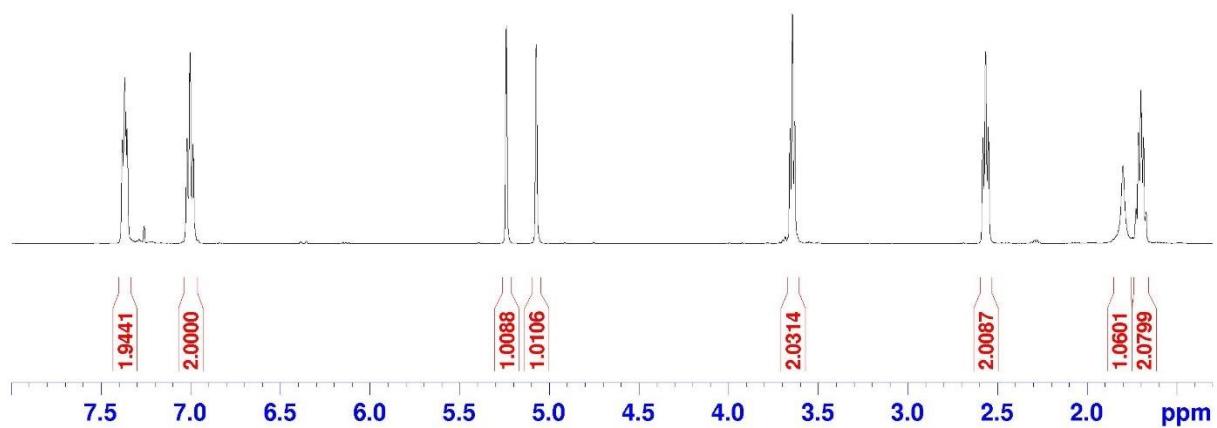

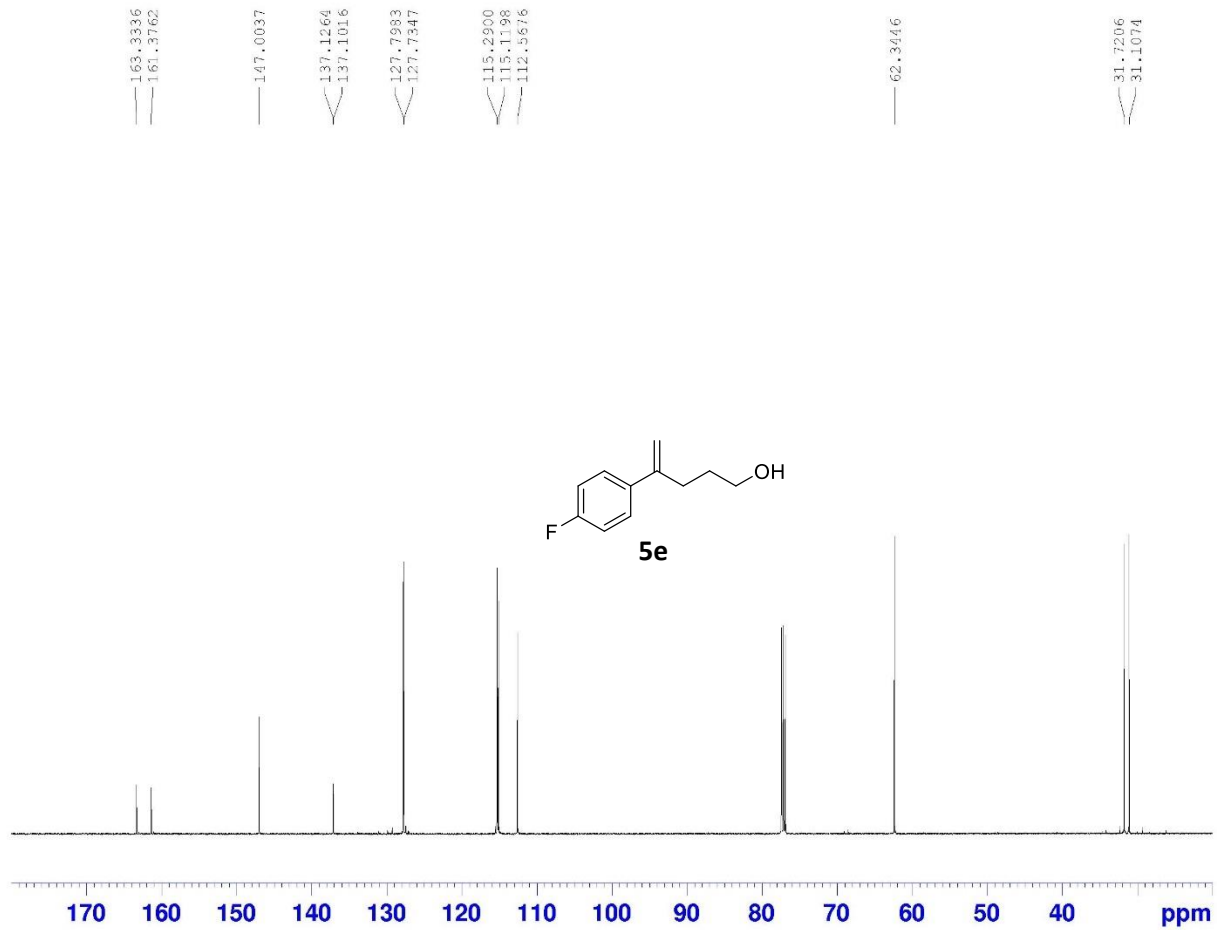

```

Current Data Parameters
NAME      JW235 data
EXPNO     2
PROCNO    1

F2 - Acquisition Parameters
Data_     20201216
Time_     21.11 h
INSTRUM   spect
PROBHD    Z119470_0283
PULPROG   zgpg30
TD         55536
SOLVENT   CDC13
NS         700
DS         4
SWH        23751.904 Hz
FIDRES     0.308261 Hz
AQ         1.1010048 sec
RG         205.72
DW         16.800 usec
DE         6.50 usec
TK         295.2 K
D1         2.0000000 sec
D11        0.0300000 sec
TD0        1
SFO1       125.7703643 MHz
NUC1       13C
P1         9.75 usec
PLW1       94.0000000 W
SFO2       500.1320005 MHz
NUC2       1H
CFDPRG[2] waltz16
PCPD2      80.00 usec
PLW2       25.0000000 W
PLW12      0.46495000 W
ELW13      0.23387000 W

F2 - Processing parameters
SI         32768
SF         125.7577798 MHz
AQ         0
SSE        0
LA         1.00 Hz
GB         0
PC         1.40

```

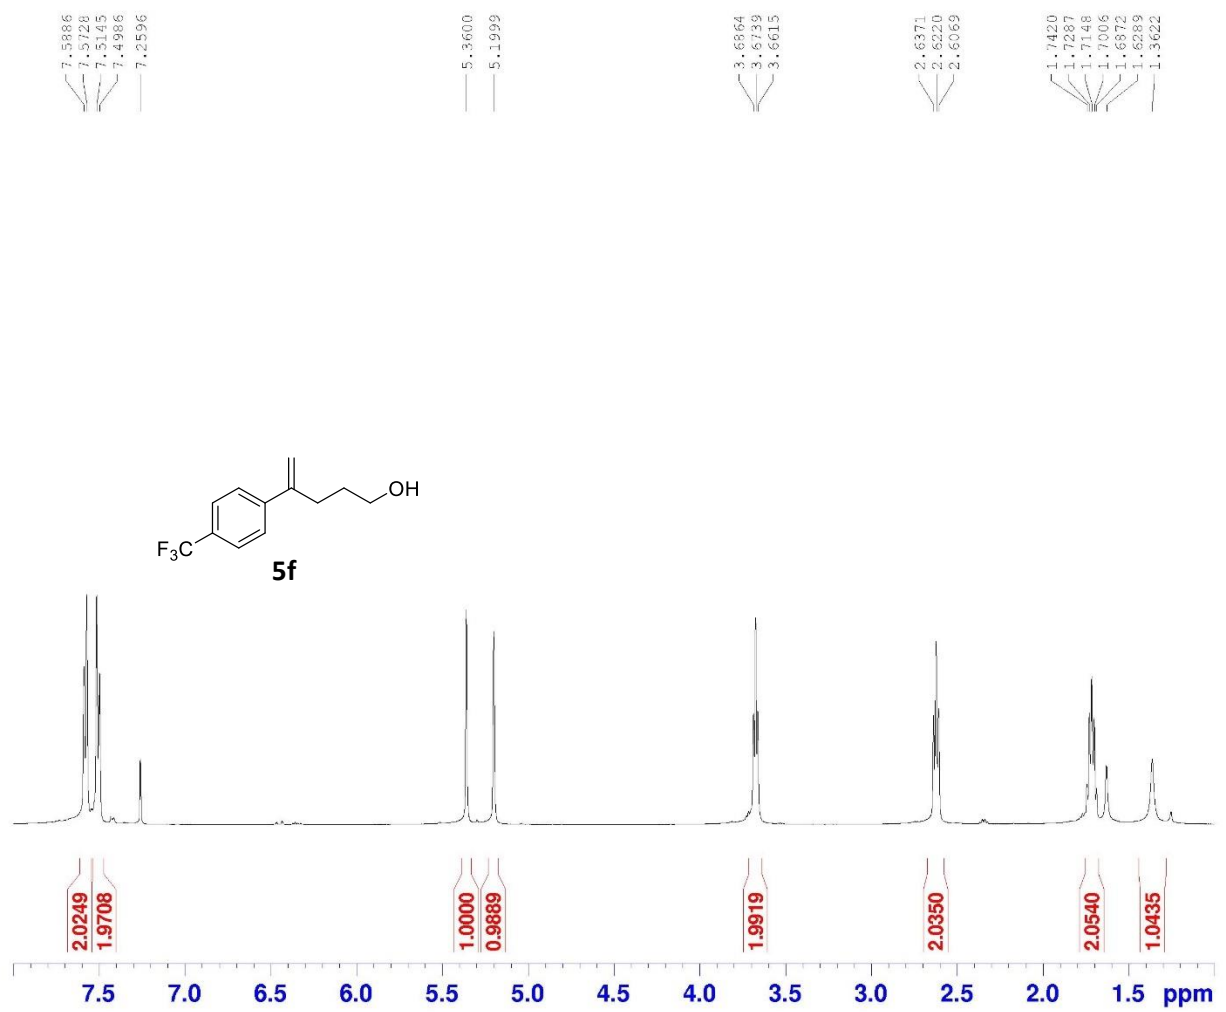

```

Current Data Parameters
NAME      JWS01A ptlc data
EXPNO    1
PROCNO   1

F2 - Acquisition Parameters
Date_    20201224
Time     2.39 h
INSTRUM  spect
PROBHD   M119470_0283
PULPROG  zg30
TD        65536
SOLVENT  CDCl3
NS        16
DS        2
SWH       10000.000 Hz
FIDRES    0.305176 Hz
AQ        3.2767999 sec
RG        93.28
DW        50.000 usec
DE        6.50 usec
TE        295.2 K
D1        1.00000000 sec
TDO       1
SFO1     500.1330883 MHz
NUC1      1H
P1        10.91 usec
PLW1     25.00000000 W

F2 - Processing parameters
SI        65536
SF        500.1300126 MHz
WDW       EM
SSB       0
LB        0.30 Hz
GB        0
PC        1.00
  
```

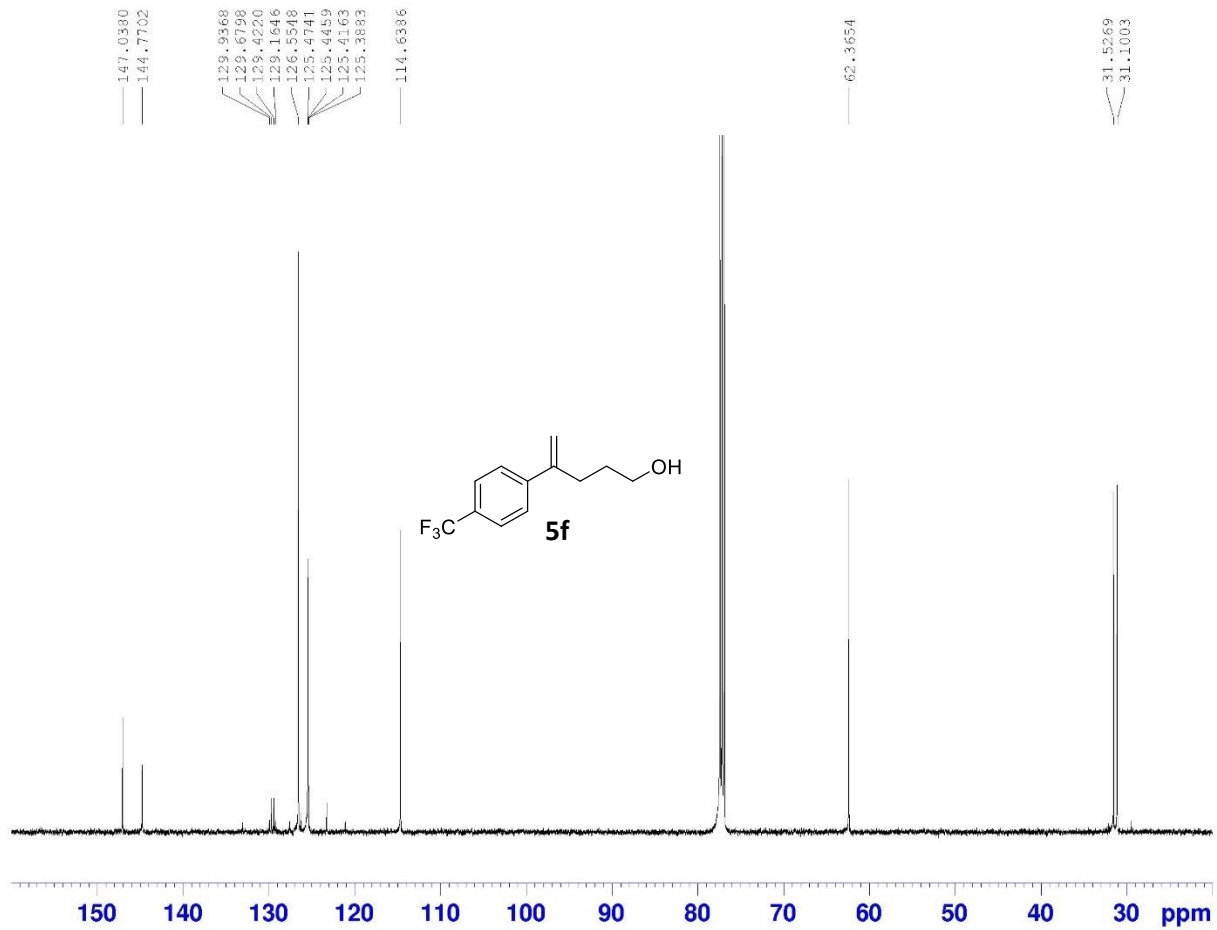

Current Data Parameters  
 NAME JWS01A ptlc data2  
 EXPNO 1  
 PROCNO 1

F2 - Acquisition Parameters  
 Date\_ 20201225  
 Time 17.19 h  
 INSTRUM spect  
 PROBRD M119470\_0283  
 EULPROG zgpg30  
 TD 5536  
 SOLVENT cdc13  
 NS 2000  
 DS 1  
 SWH 29751.904 Hz  
 FIDRES 0.308261 Hz  
 AQ 1.1010048 sec  
 RG 205.72  
 DW 16.800 usec  
 DE 6.50 usec  
 TQ 295.2 K  
 D1 2.0000000 sec  
 D11 0.0300000 sec  
 TD0 1  
 SFO1 125.7703643 MHz  
 NUC1 13C  
 P1 9.75 usec  
 PLW1 94.0000000 W  
 SFO2 500.1320005 MHz  
 NUC2 1H  
 CYPRG[2] waltz16  
 PCPD2 80.00 usec  
 PLW2 25.0000000 W  
 PLW12 0.46495000 W  
 PLW13 0.23387000 W

F2 - Processing parameters  
 SI 32768  
 SF 125.7577735 MHz  
 NUW 1H  
 SSB 0  
 LA 1.00 Hz  
 GB 0  
 PC 1.40

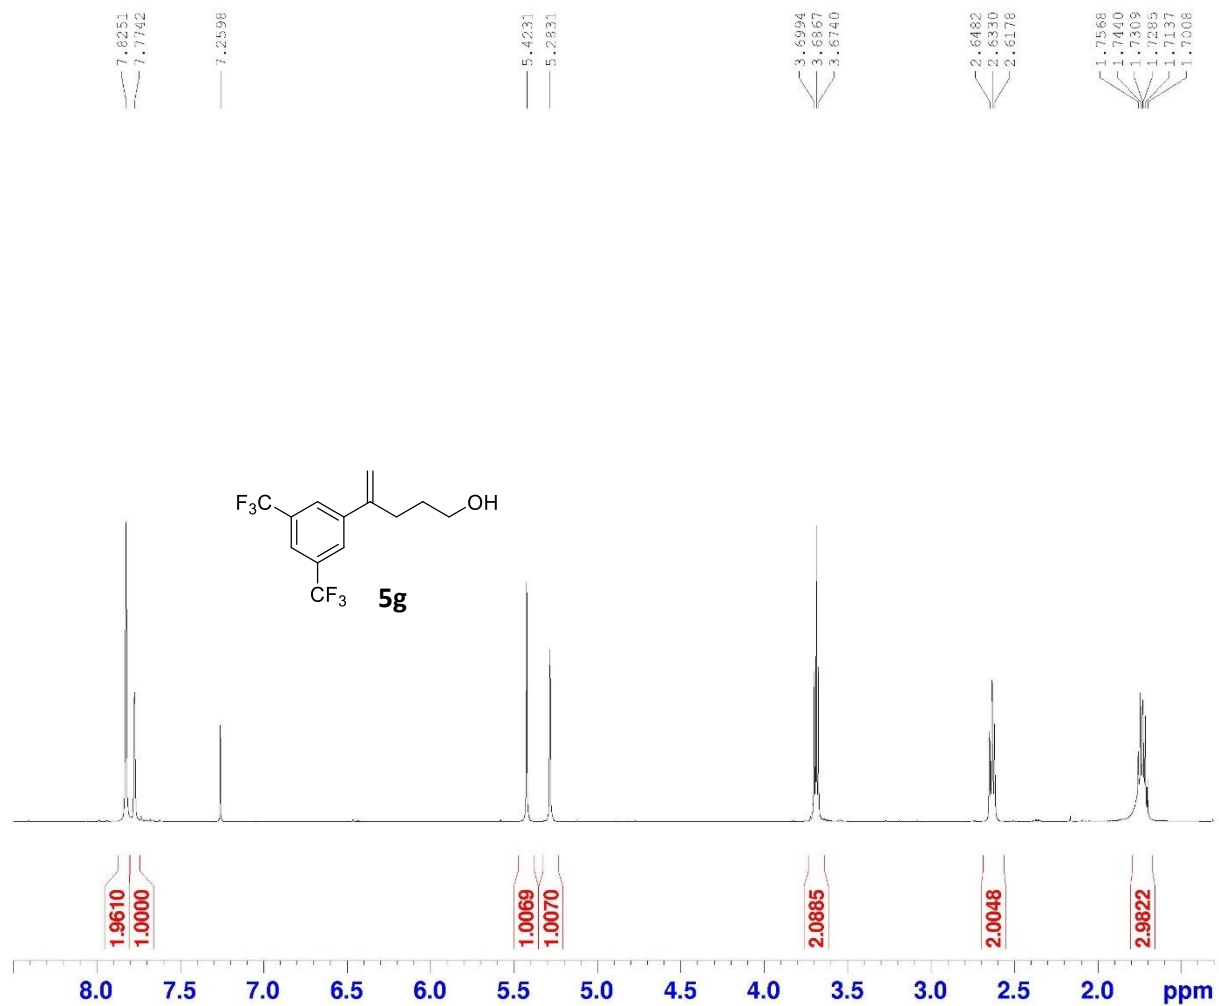

```

Current Data Parameters
NAME          SW301 c datax
EXPNO        1
PROCNO       1

F2 - Acquisition Parameters
Data_        20201207
Time_        21.14 h
INSTRUM      spect
PROBHD       M119470_0283
PULPROG      zg30
TD           65536
SOLVENT      CDCl3
NS           16
DS           2
SWH          10000.000 Hz
FIDRES       0.305176 Hz
AQ           3.2767999 sec
RG           30.85
DW           50.000 usec
DE           6.50 usec
TE           295.1 K
D1           1.00000000 sec
TDO          1
SFO1         500.1330683 MHz
NUC1          1H
P1           10.91 usec
PLW1         25.00000000 W

F2 - Processing parameters
SI           65536
SF           500.1300123 MHz
WDW          EM
SSB          0
LB           0.30 Hz
GB           0
PC           1.00
  
```



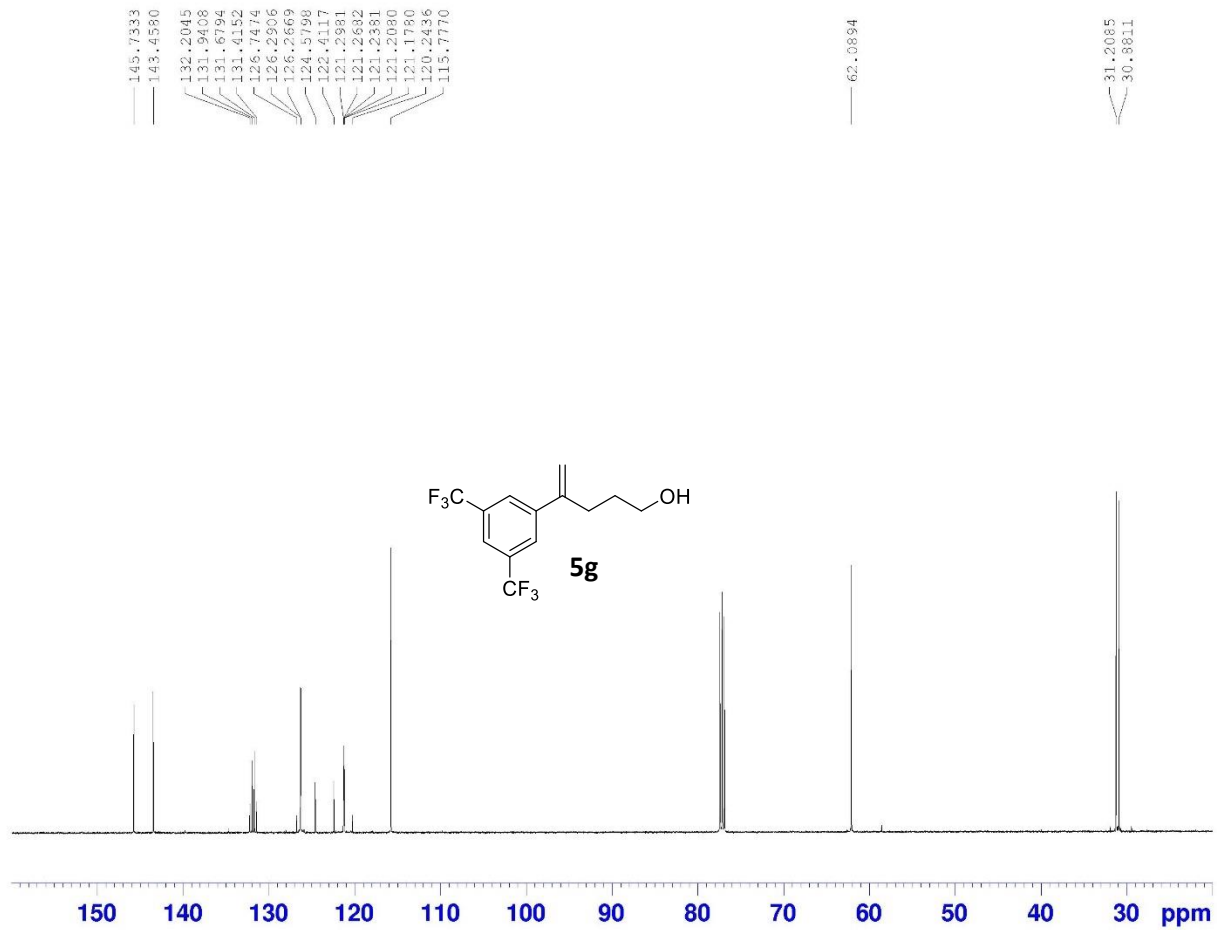

```

Current Data Parameters
NAME      LW301 C datax
EXPNO     2
PROCNO    1

F2 - Acquisition Parameters
Data_     20201207
Time      21.57 h
INSTRUM   spect
PROBHD    W119470_0283
PULPROG   zgpg30
TD         55336
SOLVENT   CDC13
NS         700
DS         4
SWH        31250.000 Hz
FIDRES     0.383674 Hz
AQ         1.0485760 sec
RG         206.72
DW         16.000 usec
DE         6.50 usec
TK         295.1 K
D1         2.0000000 sec
D11        0.0300000 sec
TD0        1
SFO1       125.7703643 MHz
NUC1       13C
P1         9.75 usec
PLW1       94.0000000 W
SFO2       500.1320005 MHz
NUC2       1H
CFDRPG[2] waltz16
PCPD2      80.00 usec
PLW2       25.0000000 W
PLW12      0.46495000 W
ELW13      0.23387000 W

F2 - Processing parameters
SI         32768
SF         125.7577712 MHz
AQW        BM
SSE        0
LA         1.00 Hz
GB         0
PC         1.40

```
